# Supplementary material for: Synthesis and Study of Dibenzo[b, f]oxepine Combined with Fluoroazobenzenes—New Photoswitches for Application in Biological Systems
Source: MDPI journal article supplement (doi:10.3390/molecules27185836), 2022-09-08
Supplement: s1 [file s1]

# Synthesis and study of dibenzo[*b, f*]oxepine combined with fluoroazobenzenes - new photoswitches for application in biological systems

Filip Borys<sup>a,b</sup>, Piotr Tobiasz<sup>a</sup>, Jakub Sobel<sup>a</sup> and Hanna Krawczyk<sup>\*a</sup>

Department of Organic Chemistry, Faculty of Chemistry, Warsaw University of Technology, Noakowskiego 3, 00-664 Warsaw, Poland.

<sup>a</sup>Department of Organic Chemistry, Faculty of Chemistry, Warsaw University of Technology, Noakowskiego 3, 00-664 Warsaw, Poland.

hkraw@ch.pw.edu.pl or hanna.krawczyk@pw.edu.pl

<sup>b</sup> Laboratory of Cytoskeleton and Cilia Biology Nencki Institute of Experimental Biology of Polish Academy of Sciences, 3 Pasteur Street, 02-093 Warsaw, Poland. fborys@ch.pw.edu.pl

## Supporting Information

## Table of Contents:

|                                                                                                                                                                  |     |
|------------------------------------------------------------------------------------------------------------------------------------------------------------------|-----|
| 1. Computational aspects and molecular docking .....                                                                                                             | 3   |
| 2. Experimental section.....                                                                                                                                     | 85  |
| 3. NMR spectra of obtained compounds, yield, time of reaction, melting point and high resolution mass data .....                                                 | 87  |
| 4. Scope of methyl proton NMR spectrum (DMSO-D <sub>6</sub> ) of ( <i>5h anti</i> ) and ( <i>5h syn</i> ) reaction products measured at different temperatures.. | 135 |
| 5. References.....                                                                                                                                               | 137 |

## 1. Computational aspects and molecular docking

The optimum ground-state geometry for (**4a-4h**, *E / Z* and **5a-5h**, *E / Z*) compounds was calculated using the density functional theory (DFT). In calculation, the B3LYP functional and 6-31G\* for basis set was employed and the continuum model (PCM; Gaussian 03W) [1,2] was used to simulate the effects of the solvent. HOMO and LUMO molecular orbitals for all compounds (**4a-4h**, *E / Z* and **5a-5h**, *E / Z*) were computed. All the calculations were performed on a server equipped with a 16 quad-core XEON (R) CPU E7310 processor operating at 1.60 GHz. The operating system was Open SUSE 10.3, in DMSO as a solvent. The Avogadro program (version:1.2.0; <http://avogadro.cc/>) was used to obtain corresponding difference densities and molecular orbitals.

### 1.1 Calculated Structures

#### 1.1.1 Optimized Geometries:

- The calculated coordinates of (**4aE**) (the part of calculated log file) -

Standard orientation:

| Center<br>Number | Atomic<br>Number | Atomic<br>Type | Coordinates (Angstroms) |           |           |
|------------------|------------------|----------------|-------------------------|-----------|-----------|
|                  |                  |                | X                       | Y         | Z         |
| 1                | 6                | 0              | 1.664929                | 1.331860  | -0.502191 |
| 2                | 6                | 0              | 2.008510                | 2.691329  | -0.404910 |
| 3                | 6                | 0              | 3.340504                | 3.078516  | -0.407153 |
| 4                | 6                | 0              | 4.387573                | 2.142717  | -0.497953 |
| 5                | 6                | 0              | 4.011416                | 0.792232  | -0.615783 |
| 6                | 6                | 0              | 2.685724                | 0.374841  | -0.609635 |
| 7                | 6                | 0              | 5.778772                | 2.586703  | -0.460520 |
| 8                | 6                | 0              | 6.853106                | 1.882549  | -0.041442 |
| 9                | 6                | 0              | 6.865533                | 0.517745  | 0.488450  |
| 10               | 6                | 0              | 5.895252                | -0.436978 | 0.134860  |
| 11               | 8                | 0              | 4.972315                | -0.181488 | -0.871074 |
| 12               | 6                | 0              | 7.860240                | 0.137071  | 1.409219  |
| 13               | 6                | 0              | 7.868837                | -1.133717 | 1.977193  |
| 14               | 6                | 0              | 6.887426                | -2.062875 | 1.627776  |
| 15               | 6                | 0              | 5.895643                | -1.717749 | 0.706518  |
| 16               | 7                | 0              | 0.295874                | 1.005222  | -0.479209 |
| 17               | 6                | 0              | -0.300565               | -0.219795 | -0.685126 |
| 18               | 8                | 0              | 0.322260                | -1.239974 | -0.972180 |
| 19               | 6                | 0              | -1.795871               | -0.232817 | -0.547308 |

|    |   |   |            |           |           |
|----|---|---|------------|-----------|-----------|
| 20 | 6 | 0 | -2.500341  | -1.212623 | -1.260235 |
| 21 | 6 | 0 | -3.884922  | -1.289720 | -1.166232 |
| 22 | 6 | 0 | -4.589604  | -0.400445 | -0.341945 |
| 23 | 6 | 0 | -3.887651  | 0.569730  | 0.393753  |
| 24 | 6 | 0 | -2.505518  | 0.649694  | 0.287925  |
| 25 | 7 | 0 | -5.997586  | -0.574611 | -0.318239 |
| 26 | 7 | 0 | -6.613269  | 0.230740  | 0.433396  |
| 27 | 6 | 0 | -8.019752  | 0.066683  | 0.464843  |
| 28 | 6 | 0 | -8.706201  | 0.949308  | 1.311383  |
| 29 | 6 | 0 | -10.093913 | 0.877590  | 1.422090  |
| 30 | 6 | 0 | -10.800448 | -0.075638 | 0.685876  |
| 31 | 6 | 0 | -10.116493 | -0.958160 | -0.161886 |
| 32 | 6 | 0 | -8.733095  | -0.893082 | -0.276558 |
| 33 | 1 | 0 | 1.226838   | 3.443903  | -0.330384 |
| 34 | 1 | 0 | 3.586453   | 4.134516  | -0.328824 |
| 35 | 1 | 0 | 2.456712   | -0.675410 | -0.709819 |
| 36 | 1 | 0 | 5.938592   | 3.630072  | -0.727767 |
| 37 | 1 | 0 | 7.807895   | 2.403440  | 0.001648  |
| 38 | 1 | 0 | 8.621821   | 0.862240  | 1.684507  |
| 39 | 1 | 0 | 8.642199   | -1.405245 | 2.690130  |
| 40 | 1 | 0 | 6.873475   | -3.061607 | 2.054309  |
| 41 | 1 | 0 | -0.327537  | 1.797915  | -0.392892 |
| 42 | 1 | 0 | -1.945873  | -1.904874 | -1.884886 |
| 43 | 1 | 0 | -4.445339  | -2.035472 | -1.722223 |
| 44 | 1 | 0 | -4.438040  | 1.240614  | 1.043669  |
| 45 | 1 | 0 | -1.977519  | 1.384352  | 0.890887  |
| 46 | 1 | 0 | -8.130704  | 1.680638  | 1.871486  |
| 47 | 1 | 0 | -10.622083 | 1.562472  | 2.079511  |
| 48 | 1 | 0 | -11.882407 | -0.134347 | 0.768974  |
| 49 | 1 | 0 | -10.670942 | -1.698047 | -0.733143 |
| 50 | 1 | 0 | -8.188132  | -1.568337 | -0.927051 |
| 51 | 8 | 0 | 4.911632   | -2.628306 | 0.398519  |
| 52 | 6 | 0 | 5.060728   | -3.272174 | -0.872906 |
| 53 | 1 | 0 | 4.225413   | -3.970718 | -0.959907 |
| 54 | 1 | 0 | 5.019052   | -2.546424 | -1.691248 |
| 55 | 1 | 0 | 6.006428   | -3.827751 | -0.919347 |

---

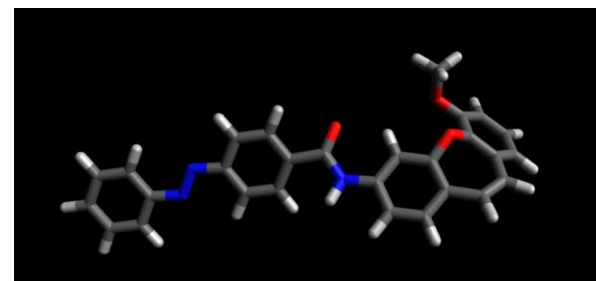

Visualization of calculated geometry of (**4aE**):

- The calculated coordinates of (**4aZ**) ( the part of calculated log file) -

Standard orientation:

| Center<br>Number | Atomic<br>Number | Atomic<br>Type | Coordinates (Angstroms) |           |           |
|------------------|------------------|----------------|-------------------------|-----------|-----------|
|                  |                  |                | X                       | Y         | Z         |
| 1                | 6                | 0              | 1.015002                | 1.079552  | -0.134309 |
| 2                | 6                | 0              | 1.159127                | 2.439330  | 0.191474  |
| 3                | 6                | 0              | 2.406972                | 3.043185  | 0.141489  |
| 4                | 6                | 0              | 3.563718                | 2.330532  | -0.223903 |
| 5                | 6                | 0              | 3.385279                | 0.976491  | -0.563590 |
| 6                | 6                | 0              | 2.147890                | 0.344170  | -0.515388 |
| 7                | 6                | 0              | 4.865663                | 2.993038  | -0.239720 |
| 8                | 6                | 0              | 6.078862                | 2.421470  | -0.074333 |
| 9                | 6                | 0              | 6.364887                | 1.008862  | 0.185159  |
| 10               | 6                | 0              | 5.509749                | -0.017291 | -0.239537 |
| 11               | 8                | 0              | 4.443208                | 0.245414  | -1.090413 |
| 12               | 6                | 0              | 7.519851                | 0.655620  | 0.912346  |
| 13               | 6                | 0              | 7.783978                | -0.672490 | 1.218764  |
| 14               | 6                | 0              | 6.912673                | -1.687959 | 0.811356  |
| 15               | 6                | 0              | 5.764522                | -1.365820 | 0.078009  |
| 16               | 7                | 0              | -0.278354               | 0.529039  | -0.051878 |
| 17               | 6                | 0              | -0.704299               | -0.732224 | -0.406614 |
| 18               | 8                | 0              | 0.030625                | -1.578334 | -0.912071 |
| 19               | 6                | 0              | -2.155014               | -1.019867 | -0.144995 |
| 20               | 6                | 0              | -2.922511               | -0.360808 | 0.828346  |
| 21               | 6                | 0              | -4.258705               | -0.694825 | 1.029205  |
| 22               | 6                | 0              | -4.844229               | -1.712958 | 0.262637  |
| 23               | 6                | 0              | -4.069939               | -2.413872 | -0.673411 |
| 24               | 6                | 0              | -2.745665               | -2.054679 | -0.886281 |
| 25               | 7                | 0              | -6.149531               | -2.232766 | 0.550174  |
| 26               | 6                | 0              | -7.246742               | -0.144207 | 0.303074  |
| 27               | 6                | 0              | -8.009448               | 0.672630  | 1.149647  |
| 28               | 6                | 0              | -8.211740               | 2.012063  | 0.824878  |
| 29               | 6                | 0              | -7.708356               | 2.525422  | -0.373693 |
| 30               | 6                | 0              | -6.993747               | 1.695263  | -1.242127 |
| 31               | 6                | 0              | -6.750288               | 0.364710  | -0.906981 |
| 32               | 7                | 0              | -7.179742               | -1.531857 | 0.658326  |
| 33               | 1                | 0              | 0.288022                | 3.022919  | 0.480891  |
| 34               | 1                | 0              | 2.498032                | 4.095626  | 0.398338  |
| 35               | 1                | 0              | 2.072076                | -0.695990 | -0.794337 |
| 36               | 1                | 0              | 4.831074                | 4.078630  | -0.317739 |
| 37               | 1                | 0              | 6.942249                | 3.082888  | -0.030185 |
| 38               | 1                | 0              | 8.195843                | 1.440320  | 1.241194  |
| 39               | 1                | 0              | 8.676116                | -0.933463 | 1.781273  |

|    |   |   |           |           |           |
|----|---|---|-----------|-----------|-----------|
| 40 | 1 | 0 | 7.138974  | -2.719223 | 1.056240  |
| 41 | 1 | 0 | -0.996597 | 1.182907  | 0.230691  |
| 42 | 1 | 0 | -2.480506 | 0.398305  | 1.468715  |
| 43 | 1 | 0 | -4.836496 | -0.188413 | 1.795403  |
| 44 | 1 | 0 | -4.520662 | -3.231765 | -1.228305 |
| 45 | 1 | 0 | -2.140179 | -2.582738 | -1.615127 |
| 46 | 1 | 0 | -8.424726 | 0.246716  | 2.058726  |
| 47 | 1 | 0 | -8.779856 | 2.649548  | 1.496624  |
| 48 | 1 | 0 | -7.887051 | 3.563716  | -0.638904 |
| 49 | 1 | 0 | -6.622257 | 2.085370  | -2.185784 |
| 50 | 1 | 0 | -6.203725 | -0.279709 | -1.587497 |
| 51 | 8 | 0 | 4.857485  | -2.269407 | -0.385506 |
| 52 | 6 | 0 | 5.066925  | -3.642461 | -0.075389 |
| 53 | 1 | 0 | 4.228022  | -4.178086 | -0.522760 |
| 54 | 1 | 0 | 6.006123  | -4.013452 | -0.505110 |
| 55 | 1 | 0 | 5.071894  | -3.813643 | 1.008546  |

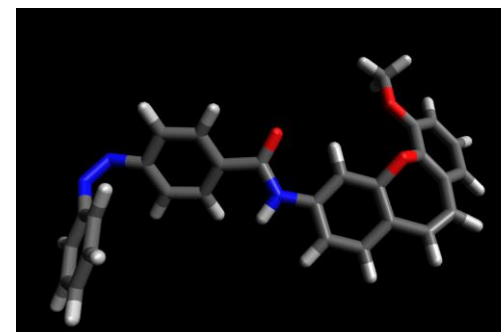

Visualization of calculated geometry of (**4aZ**):

- The calculated coordinates of (**4bE**) ( the part of calculated log file) -

Standard orientation:

| Center<br>Number | Atomic<br>Number | Atomic<br>Type | Coordinates (Angstroms) |           |           |
|------------------|------------------|----------------|-------------------------|-----------|-----------|
|                  |                  |                | X                       | Y         | Z         |
| 1                | 6                | 0              | -2.072991               | -1.414567 | -0.411623 |
| 2                | 6                | 0              | -2.409635               | -2.751376 | -0.136256 |
| 3                | 6                | 0              | -3.739375               | -3.144141 | -0.092769 |
| 4                | 6                | 0              | -4.790524               | -2.234660 | -0.311507 |
| 5                | 6                | 0              | -4.421816               | -0.909145 | -0.607044 |
| 6                | 6                | 0              | -3.098120               | -0.486242 | -0.649689 |
| 7                | 6                | 0              | -6.180556               | -2.675956 | -0.226226 |
| 8                | 6                | 0              | -7.260827               | -1.926537 | 0.086304  |
| 9                | 6                | 0              | -7.281703               | -0.504527 | 0.435930  |
| 10               | 6                | 0              | -6.310583               | 0.393044  | -0.029005 |
| 11               | 8                | 0              | -5.388153               | 0.011228  | -0.995309 |

|    |   |   |           |           |           |
|----|---|---|-----------|-----------|-----------|
| 12 | 6 | 0 | -8.287560 | -0.012980 | 1.292790  |
| 13 | 6 | 0 | -8.294641 | 1.319338  | 1.683220  |
| 14 | 6 | 0 | -7.307184 | 2.202351  | 1.234038  |
| 15 | 6 | 0 | -6.303391 | 1.742980  | 0.373192  |
| 16 | 7 | 0 | -0.704847 | -1.082735 | -0.428929 |
| 17 | 6 | 0 | -0.111789 | 0.116904  | -0.755418 |
| 18 | 8 | 0 | -0.737252 | 1.103379  | -1.138834 |
| 19 | 6 | 0 | 1.384366  | 0.146424  | -0.624052 |
| 20 | 6 | 0 | 2.082067  | 1.068107  | -1.416742 |
| 21 | 6 | 0 | 3.466644  | 1.158587  | -1.335659 |
| 22 | 6 | 0 | 4.179226  | 0.340539  | -0.446850 |
| 23 | 6 | 0 | 3.484445  | -0.570142 | 0.367603  |
| 24 | 6 | 0 | 2.102213  | -0.662958 | 0.275867  |
| 25 | 7 | 0 | 5.585908  | 0.521233  | -0.443558 |
| 26 | 7 | 0 | 6.209479  | -0.226408 | 0.360223  |
| 27 | 6 | 0 | 7.612263  | -0.053549 | 0.373731  |
| 28 | 6 | 0 | 8.312130  | -0.881391 | 1.264872  |
| 29 | 6 | 0 | 9.698246  | -0.801547 | 1.367921  |
| 30 | 6 | 0 | 10.365451 | 0.117801  | 0.565932  |
| 31 | 6 | 0 | 9.698373  | 0.954972  | -0.330336 |
| 32 | 6 | 0 | 8.316622  | 0.867493  | -0.425429 |
| 33 | 9 | 0 | 11.707315 | 0.206757  | 0.654694  |
| 34 | 1 | 0 | -1.624089 | -3.482484 | 0.041224  |
| 35 | 1 | 0 | -3.979544 | -4.181975 | 0.124201  |
| 36 | 1 | 0 | -2.876700 | 0.543581  | -0.886196 |
| 37 | 1 | 0 | -6.335013 | -3.746160 | -0.355061 |
| 38 | 1 | 0 | -8.214653 | -2.441045 | 0.187996  |
| 39 | 1 | 0 | -9.051783 | -0.695750 | 1.654250  |
| 40 | 1 | 0 | -9.073355 | 1.687456  | 2.345436  |
| 41 | 1 | 0 | -7.332946 | 3.239698  | 1.546969  |
| 42 | 1 | 0 | -0.079647 | -1.860639 | -0.261205 |
| 43 | 1 | 0 | 1.521812  | 1.705622  | -2.092367 |
| 44 | 1 | 0 | 4.020817  | 1.859960  | -1.952366 |
| 45 | 1 | 0 | 4.040027  | -1.184918 | 1.066713  |
| 46 | 1 | 0 | 1.581562  | -1.348534 | 0.939821  |
| 47 | 1 | 0 | 7.748570  | -1.584076 | 1.871137  |
| 48 | 1 | 0 | 10.258978 | -1.431968 | 2.050349  |
| 49 | 1 | 0 | 10.268163 | 1.655347  | -0.933162 |
| 50 | 1 | 0 | 7.764795  | 1.501828  | -1.110069 |
| 51 | 8 | 0 | -5.304136 | 2.513435  | -0.139031 |
| 52 | 6 | 0 | -5.253589 | 3.881652  | 0.249132  |
| 53 | 1 | 0 | -4.383068 | 4.301208  | -0.257770 |
| 54 | 1 | 0 | -6.154569 | 4.422777  | -0.066744 |
| 55 | 1 | 0 | -5.129207 | 3.987454  | 1.334289  |

---

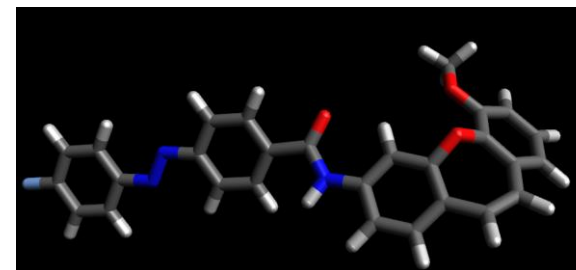

Visualization of calculated geometry of (**4bE**):

- The calculated coordinates of (**4bZ**) ( the part of calculated log file) -

| Standard orientation: |                  |                |                         |           |           |
|-----------------------|------------------|----------------|-------------------------|-----------|-----------|
| Center<br>Number      | Atomic<br>Number | Atomic<br>Type | Coordinates (Angstroms) |           |           |
|                       |                  |                | X                       | Y         | Z         |
| 1                     | 6                | 0              | 1.474593                | -1.260341 | -0.561295 |
| 2                     | 6                | 0              | 1.842704                | -2.511758 | -1.085257 |
| 3                     | 6                | 0              | 3.124288                | -3.004533 | -0.887145 |
| 4                     | 6                | 0              | 4.096272                | -2.281753 | -0.171082 |
| 5                     | 6                | 0              | 3.692465                | -1.041696 | 0.357809  |
| 6                     | 6                | 0              | 2.417560                | -0.520547 | 0.168591  |
| 7                     | 6                | 0              | 5.443842                | -2.820393 | -0.003315 |
| 8                     | 6                | 0              | 6.586973                | -2.126069 | 0.189917  |
| 9                     | 6                | 0              | 6.740788                | -0.670716 | 0.245532  |
| 10                    | 6                | 0              | 5.700718                | 0.174993  | 0.654838  |
| 11                    | 8                | 0              | 4.536406                | -0.340745 | 1.210784  |
| 12                    | 6                | 0              | 7.958620                | -0.083843 | -0.154530 |
| 13                    | 6                | 0              | 8.107635                | 1.296480  | -0.167060 |
| 14                    | 6                | 0              | 7.055192                | 2.133700  | 0.217408  |
| 15                    | 6                | 0              | 5.839083                | 1.576519  | 0.630297  |
| 16                    | 7                | 0              | 0.161630                | -0.815711 | -0.808181 |
| 17                    | 6                | 0              | -0.478077               | 0.299995  | -0.313849 |
| 18                    | 8                | 0              | 0.033946                | 1.079447  | 0.487135  |
| 19                    | 6                | 0              | -1.878775               | 0.505175  | -0.813150 |
| 20                    | 6                | 0              | -2.331432               | 0.060480  | -2.064785 |
| 21                    | 6                | 0              | -3.631766               | 0.329295  | -2.481896 |
| 22                    | 6                | 0              | -4.516812               | 0.999368  | -1.627685 |
| 23                    | 6                | 0              | -4.065358               | 1.473386  | -0.385034 |
| 24                    | 6                | 0              | -2.753075               | 1.238450  | 0.003827  |
| 25                    | 7                | 0              | -5.796460               | 1.363082  | -2.161354 |
| 26                    | 6                | 0              | -7.024210               | 0.450840  | -0.348024 |
| 27                    | 6                | 0              | -6.433737               | -0.805619 | -0.133232 |
| 28                    | 6                | 0              | -6.742847               | -1.531989 | 1.013037  |

|    |   |   |           |           |           |
|----|---|---|-----------|-----------|-----------|
| 29 | 6 | 0 | -7.625036 | -0.983250 | 1.939698  |
| 30 | 6 | 0 | -8.236976 | 0.250926  | 1.743387  |
| 31 | 6 | 0 | -7.954489 | 0.952008  | 0.574938  |
| 32 | 7 | 0 | -6.881601 | 1.204131  | -1.558467 |
| 33 | 9 | 0 | -7.910947 | -1.682106 | 3.056724  |
| 34 | 8 | 0 | 4.754700  | 2.290779  | 1.040473  |
| 35 | 6 | 0 | 4.846690  | 3.710772  | 1.020573  |
| 36 | 1 | 0 | 1.118630  | -3.098800 | -1.645782 |
| 37 | 1 | 0 | 3.390248  | -3.974016 | -1.300979 |
| 38 | 1 | 0 | 2.164055  | 0.433840  | 0.604891  |
| 39 | 1 | 0 | 5.529222  | -3.899067 | -0.125803 |
| 40 | 1 | 0 | 7.517895  | -2.689803 | 0.210836  |
| 41 | 1 | 0 | 8.776659  | -0.727876 | -0.465827 |
| 42 | 1 | 0 | 9.049838  | 1.738615  | -0.478855 |
| 43 | 1 | 0 | 7.192669  | 3.208708  | 0.204113  |
| 44 | 1 | 0 | -0.408158 | -1.457788 | -1.344183 |
| 45 | 1 | 0 | -1.661588 | -0.454621 | -2.748506 |
| 46 | 1 | 0 | -3.972266 | 0.022494  | -3.466501 |
| 47 | 1 | 0 | -4.735415 | 2.033879  | 0.259101  |
| 48 | 1 | 0 | -2.384941 | 1.616010  | 0.952098  |
| 49 | 1 | 0 | -5.755995 | -1.226752 | -0.867353 |
| 50 | 1 | 0 | -6.311919 | -2.511511 | 1.194406  |
| 51 | 1 | 0 | -8.933250 | 0.633535  | 2.482671  |
| 52 | 1 | 0 | -8.439825 | 1.901732  | 0.370227  |
| 53 | 1 | 0 | 3.878814  | 4.075047  | 1.368835  |
| 54 | 1 | 0 | 5.635074  | 4.072426  | 1.692891  |
| 55 | 1 | 0 | 5.034380  | 4.087274  | 0.006997  |

---

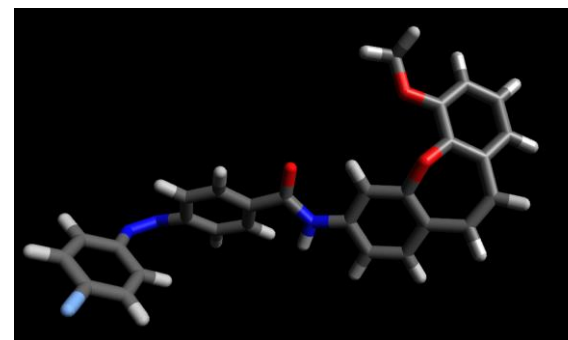

Visualization of calculated geometry of (**4bZ**):

- The calculated coordinates of (**4cE**) ( the part of calculated log file) -

Standard orientation:

---

| Center<br>Number | Atomic<br>Number | Atomic<br>Type | Coordinates (Angstroms) |           |           |
|------------------|------------------|----------------|-------------------------|-----------|-----------|
|                  |                  |                | X                       | Y         | Z         |
| 1                | 6                | 0              | 2.326308                | 1.322534  | -0.562815 |
| 2                | 6                | 0              | 2.671489                | 2.684634  | -0.525721 |
| 3                | 6                | 0              | 4.004067                | 3.069444  | -0.536867 |
| 4                | 6                | 0              | 5.050231                | 2.129117  | -0.578109 |
| 5                | 6                | 0              | 4.672684                | 0.775206  | -0.637460 |
| 6                | 6                | 0              | 3.346288                | 0.360253  | -0.620482 |
| 7                | 6                | 0              | 6.441631                | 2.572876  | -0.551125 |
| 8                | 6                | 0              | 7.512937                | 1.886443  | -0.096443 |
| 9                | 6                | 0              | 7.522540                | 0.544628  | 0.489237  |
| 10               | 6                | 0              | 6.553383                | -0.423963 | 0.171994  |
| 11               | 8                | 0              | 5.632912                | -0.210256 | -0.845820 |
| 12               | 6                | 0              | 8.515134                | 0.201476  | 1.426921  |
| 13               | 6                | 0              | 8.523529                | -1.045875 | 2.044646  |
| 14               | 6                | 0              | 7.543879                | -1.989055 | 1.729766  |
| 15               | 6                | 0              | 6.553847                | -1.681408 | 0.793429  |
| 16               | 7                | 0              | 0.956329                | 1.000314  | -0.537083 |
| 17               | 6                | 0              | 0.359197                | -0.236758 | -0.643130 |
| 18               | 8                | 0              | 0.983124                | -1.278856 | -0.833057 |
| 19               | 6                | 0              | -1.137944               | -0.236830 | -0.523086 |
| 20               | 6                | 0              | -1.832106               | -1.287778 | -1.138122 |
| 21               | 6                | 0              | -3.217746               | -1.357558 | -1.055284 |
| 22               | 6                | 0              | -3.934284               | -0.386987 | -0.340152 |
| 23               | 6                | 0              | -3.243172               | 0.657125  | 0.298387  |
| 24               | 6                | 0              | -1.859754               | 0.727618  | 0.204468  |
| 25               | 7                | 0              | -5.342731               | -0.564369 | -0.320489 |
| 26               | 7                | 0              | -5.961557               | 0.323439  | 0.332809  |
| 27               | 6                | 0              | -7.362070               | 0.210326  | 0.394997  |
| 28               | 6                | 0              | -7.995305               | 1.219113  | 1.146508  |
| 29               | 6                | 0              | -9.372662               | 1.265208  | 1.316597  |
| 30               | 6                | 0              | -10.136572              | 0.270254  | 0.713730  |
| 31               | 6                | 0              | -9.569584               | -0.751570 | -0.041729 |
| 32               | 6                | 0              | -8.190696               | -0.772362 | -0.193872 |
| 33               | 9                | 0              | -11.472456              | 0.289249  | 0.860643  |
| 34               | 9                | 0              | -7.669974               | -1.765112 | -0.926246 |
| 35               | 8                | 0              | 5.571641                | -2.604696 | 0.519587  |
| 36               | 6                | 0              | 5.720885                | -3.295214 | -0.727149 |
| 37               | 1                | 0              | 1.890730                | 3.440997  | -0.490108 |
| 38               | 1                | 0              | 4.251286                | 4.127568  | -0.504797 |
| 39               | 1                | 0              | 3.115515                | -0.693059 | -0.673395 |
| 40               | 1                | 0              | 6.604127                | 3.603893  | -0.861251 |
| 41               | 1                | 0              | 8.467680                | 2.408509  | -0.069504 |
| 42               | 1                | 0              | 9.275889                | 0.937328  | 1.674726  |

|    |   |   |            |           |           |
|----|---|---|------------|-----------|-----------|
| 43 | 1 | 0 | 9.295532   | -1.288335 | 2.769435  |
| 44 | 1 | 0 | 7.529883   | -2.970351 | 2.194983  |
| 45 | 1 | 0 | 0.334287   | 1.798407  | -0.520283 |
| 46 | 1 | 0 | -1.268218  | -2.040706 | -1.678362 |
| 47 | 1 | 0 | -3.770580  | -2.158740 | -1.536524 |
| 48 | 1 | 0 | -3.802538  | 1.392407  | 0.865695  |
| 49 | 1 | 0 | -1.341146  | 1.522799  | 0.734550  |
| 50 | 1 | 0 | -7.356732  | 1.972408  | 1.596966  |
| 51 | 1 | 0 | -9.853653  | 2.044757  | 1.897275  |
| 52 | 1 | 0 | -10.184144 | -1.516500 | -0.503518 |
| 53 | 1 | 0 | 4.887899   | -3.999437 | -0.786227 |
| 54 | 1 | 0 | 5.675174   | -2.600782 | -1.571927 |
| 55 | 1 | 0 | 6.668375   | -3.848996 | -0.754465 |

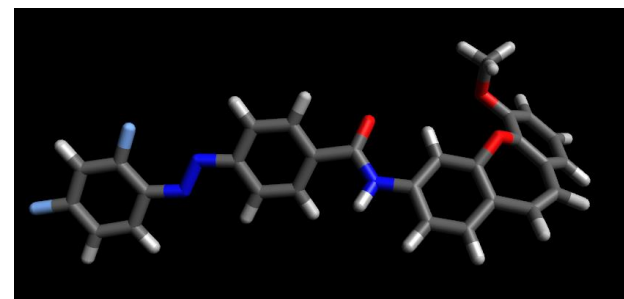

Visualization of calculated geometry of (**4cE**):

- The calculated coordinates of (**4cZ**) ( the part of calculated log file) -

Standard orientation:

| Center<br>Number | Atomic<br>Number | Atomic<br>Type | Coordinates (Angstroms) |           |           |
|------------------|------------------|----------------|-------------------------|-----------|-----------|
|                  |                  |                | X                       | Y         | Z         |
| 1                | 6                | 0              | 1.424415                | 0.965766  | -0.067314 |
| 2                | 6                | 0              | 1.530210                | 2.346319  | 0.174307  |
| 3                | 6                | 0              | 2.760297                | 2.980906  | 0.083719  |
| 4                | 6                | 0              | 3.936717                | 2.280921  | -0.242013 |
| 5                | 6                | 0              | 3.795037                | 0.905206  | -0.499685 |
| 6                | 6                | 0              | 2.577016                | 0.241633  | -0.408783 |
| 7                | 6                | 0              | 5.219282                | 2.978211  | -0.293702 |
| 8                | 6                | 0              | 6.447377                | 2.452387  | -0.091669 |
| 9                | 6                | 0              | 6.773192                | 1.064389  | 0.241429  |
| 10               | 6                | 0              | 5.951531                | -0.014045 | -0.133130 |
| 11               | 8                | 0              | 4.871598                | 0.170220  | -0.986669 |
| 12               | 6                | 0              | 7.933353                | 0.781095  | 0.986956  |
| 13               | 6                | 0              | 8.246094                | -0.520668 | 1.367933  |
| 14               | 6                | 0              | 7.410473                | -1.576879 | 1.001113  |
| 15               | 6                | 0              | 6.258962                | -1.327600 | 0.250582  |

|    |   |   |           |           |           |
|----|---|---|-----------|-----------|-----------|
| 16 | 7 | 0 | 0.147986  | 0.383821  | 0.051638  |
| 17 | 6 | 0 | -0.236104 | -0.912760 | -0.209879 |
| 18 | 8 | 0 | 0.526923  | -1.770727 | -0.649198 |
| 19 | 6 | 0 | -1.679217 | -1.225637 | 0.066251  |
| 20 | 6 | 0 | -2.467513 | -0.528622 | 0.994073  |
| 21 | 6 | 0 | -3.794651 | -0.889278 | 1.214519  |
| 22 | 6 | 0 | -4.345622 | -1.970984 | 0.512876  |
| 23 | 6 | 0 | -3.548248 | -2.707889 | -0.374820 |
| 24 | 6 | 0 | -2.235188 | -2.324918 | -0.607235 |
| 25 | 7 | 0 | -5.638961 | -2.497601 | 0.813397  |
| 26 | 6 | 0 | -6.754618 | -0.430049 | 0.502189  |
| 27 | 6 | 0 | -7.482330 | 0.433808  | 1.335097  |
| 28 | 6 | 0 | -7.710673 | 1.759148  | 0.980685  |
| 29 | 6 | 0 | -7.254312 | 2.199896  | -0.258698 |
| 30 | 6 | 0 | -6.579872 | 1.365839  | -1.143567 |
| 31 | 6 | 0 | -6.340583 | 0.058396  | -0.745750 |
| 32 | 9 | 0 | -7.485595 | 3.473079  | -0.627356 |
| 33 | 7 | 0 | -6.679197 | -1.806698 | 0.895189  |
| 34 | 9 | 0 | -5.720512 | -0.769088 | -1.607831 |
| 35 | 8 | 0 | 5.423055  | -2.371324 | -0.071605 |
| 36 | 6 | 0 | 5.511012  | -2.819870 | -1.429718 |
| 37 | 1 | 0 | 0.643686  | 2.921437  | 0.431946  |
| 38 | 1 | 0 | 2.821972  | 4.048921  | 0.276847  |
| 39 | 1 | 0 | 2.528026  | -0.815415 | -0.622610 |
| 40 | 1 | 0 | 5.154016  | 4.056242  | -0.432093 |
| 41 | 1 | 0 | 7.291004  | 3.140060  | -0.081010 |
| 42 | 1 | 0 | 8.582204  | 1.603894  | 1.276177  |
| 43 | 1 | 0 | 9.143720  | -0.716400 | 1.947647  |
| 44 | 1 | 0 | 7.633418  | -2.601804 | 1.282822  |
| 45 | 1 | 0 | -0.591191 | 1.033458  | 0.286401  |
| 46 | 1 | 0 | -2.048650 | 0.279784  | 1.587817  |
| 47 | 1 | 0 | -4.384467 | -0.358710 | 1.954538  |
| 48 | 1 | 0 | -3.975872 | -3.569180 | -0.879367 |
| 49 | 1 | 0 | -1.610723 | -2.881031 | -1.298133 |
| 50 | 1 | 0 | -7.851796 | 0.046078  | 2.279849  |
| 51 | 1 | 0 | -8.248079 | 2.438309  | 1.633708  |
| 52 | 1 | 0 | -6.255320 | 1.717380  | -2.116745 |
| 53 | 1 | 0 | 4.813220  | -3.655503 | -1.519789 |
| 54 | 1 | 0 | 5.225567  | -2.026545 | -2.127725 |
| 55 | 1 | 0 | 6.526613  | -3.167231 | -1.659992 |

---

Visualization of calculated geometry of (**4cZ**):

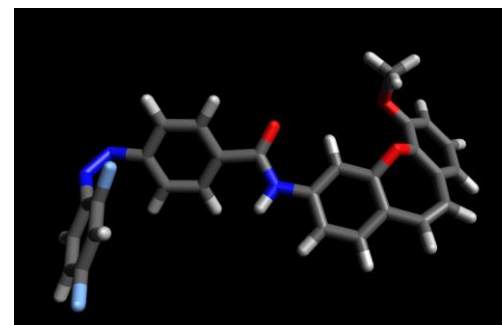

- The calculated coordinates of (**4dE**) ( the part of calculated log file) -

| Standard orientation: |                  |                |                         |           |           |
|-----------------------|------------------|----------------|-------------------------|-----------|-----------|
| Center<br>Number      | Atomic<br>Number | Atomic<br>Type | Coordinates (Angstroms) |           |           |
|                       |                  |                | X                       | Y         | Z         |
| 1                     | 6                | 0              | -2.181533               | -1.348633 | -0.574970 |
| 2                     | 6                | 0              | -2.508206               | -2.709137 | -0.439627 |
| 3                     | 6                | 0              | -3.835318               | -3.113146 | -0.433014 |
| 4                     | 6                | 0              | -4.893186               | -2.192917 | -0.551523 |
| 5                     | 6                | 0              | -4.534313               | -0.841002 | -0.706770 |
| 6                     | 6                | 0              | -3.213495               | -0.407371 | -0.710148 |
| 7                     | 6                | 0              | -6.279916               | -2.650615 | -0.509721 |
| 8                     | 6                | 0              | -7.364437               | -1.946135 | -0.117581 |
| 9                     | 6                | 0              | -7.393701               | -0.569607 | 0.381388  |
| 10                    | 6                | 0              | -6.429234               | 0.378488  | 0.013604  |
| 11                    | 8                | 0              | -5.508074               | 0.108956  | -0.991035 |
| 12                    | 6                | 0              | -8.400572               | -0.179032 | 1.287673  |
| 13                    | 6                | 0              | -8.414303               | 1.103474  | 1.819323  |
| 14                    | 6                | 0              | -7.432647               | 2.035293  | 1.466267  |
| 15                    | 6                | 0              | -6.428511               | 1.677160  | 0.559062  |
| 16                    | 7                | 0              | -0.815821               | -1.006107 | -0.561190 |
| 17                    | 6                | 0              | -0.232793               | 0.221182  | -0.787406 |
| 18                    | 8                | 0              | -0.865833               | 1.231254  | -1.087489 |
| 19                    | 6                | 0              | 1.263390                | 0.251347  | -0.654754 |
| 20                    | 6                | 0              | 1.954072                | 1.233484  | -1.377849 |
| 21                    | 6                | 0              | 3.338115                | 1.326971  | -1.289802 |
| 22                    | 6                | 0              | 4.055328                | 0.450302  | -0.462879 |
| 23                    | 6                | 0              | 3.367439                | -0.522327 | 0.283210  |
| 24                    | 6                | 0              | 1.985979                | -0.617263 | 0.184310  |
| 25                    | 7                | 0              | 5.461704                | 0.642190  | -0.448012 |
| 26                    | 7                | 0              | 6.076355                | -0.172692 | 0.298606  |
| 27                    | 6                | 0              | 7.471024                | -0.038793 | 0.367330  |
| 28                    | 6                | 0              | 8.130533                | -0.988384 | 1.178855  |
| 29                    | 6                | 0              | 9.503674                | -1.006543 | 1.367696  |
| 30                    | 6                | 0              | 10.277259               | -0.037868 | 0.727796  |
| 31                    | 6                | 0              | 9.680840                | 0.928367  | -0.084884 |
| 32                    | 6                | 0              | 8.304052                | 0.919697  | -0.256217 |
| 33                    | 9                | 0              | 7.767124                | 1.864293  | -1.039955 |
| 34                    | 9                | 0              | 7.386605                | -1.919807 | 1.795285  |
| 35                    | 8                | 0              | -5.434924               | 2.503749  | 0.130232  |
| 36                    | 6                | 0              | -5.389542               | 3.822636  | 0.663040  |
| 37                    | 1                | 0              | -1.717194               | -3.449405 | -0.342928 |

|    |   |   |           |           |           |
|----|---|---|-----------|-----------|-----------|
| 38 | 1 | 0 | -4.068045 | -4.169633 | -0.325639 |
| 39 | 1 | 0 | -2.999712 | 0.642964  | -0.838977 |
| 40 | 1 | 0 | -6.427547 | -3.702251 | -0.750705 |
| 41 | 1 | 0 | -8.314461 | -2.475217 | -0.068455 |
| 42 | 1 | 0 | -9.159964 | -0.901443 | 1.574586  |
| 43 | 1 | 0 | -9.193517 | 1.393742  | 2.518591  |
| 44 | 1 | 0 | -7.463143 | 3.032957  | 1.888622  |
| 45 | 1 | 0 | -0.184032 | -1.790556 | -0.462075 |
| 46 | 1 | 0 | 1.389123  | 1.914854  | -2.005011 |
| 47 | 1 | 0 | 3.888583  | 2.074763  | -1.852743 |
| 48 | 1 | 0 | 3.928369  | -1.182449 | 0.935090  |
| 49 | 1 | 0 | 1.468635  | -1.352522 | 0.795625  |
| 50 | 1 | 0 | 9.943375  | -1.766811 | 2.004148  |
| 51 | 1 | 0 | 11.354518 | -0.033945 | 0.862806  |
| 52 | 1 | 0 | 10.265396 | 1.690802  | -0.589165 |
| 53 | 1 | 0 | -4.522455 | 4.298489  | 0.202049  |
| 54 | 1 | 0 | -6.293943 | 4.390095  | 0.409249  |
| 55 | 1 | 0 | -5.262573 | 3.812023  | 1.753030  |

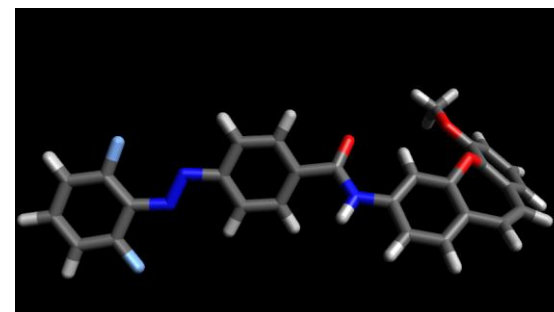

Visualization of calculated geometry of (**4dE**) :

- The calculated coordinates of (**4dZ**) ( the part of calculated log file) -

Standard orientation:

| Center<br>Number | Atomic<br>Number | Atomic<br>Type | Coordinates (Angstroms) |          |           |
|------------------|------------------|----------------|-------------------------|----------|-----------|
|                  |                  |                | X                       | Y        | Z         |
| 1                | 6                | 0              | 1.492913                | 1.031530 | -0.144554 |
| 2                | 6                | 0              | 1.642529                | 2.387549 | 0.193058  |
| 3                | 6                | 0              | 2.893492                | 2.985253 | 0.149676  |
| 4                | 6                | 0              | 4.048770                | 2.270928 | -0.217236 |
| 5                | 6                | 0              | 3.865847                | 0.919783 | -0.564764 |
| 6                | 6                | 0              | 2.624177                | 0.295134 | -0.528368 |
| 7                | 6                | 0              | 5.350487                | 2.933233 | -0.229459 |
| 8                | 6                | 0              | 6.564808                | 2.361724 | -0.075617 |
| 9                | 6                | 0              | 6.856254                | 0.947359 | 0.164316  |

|    |   |   |           |           |           |
|----|---|---|-----------|-----------|-----------|
| 10 | 6 | 0 | 5.996427  | -0.084679 | -0.257737 |
| 11 | 8 | 0 | 4.916879  | 0.177207  | -1.089335 |
| 12 | 6 | 0 | 8.021166  | 0.590268  | 0.867679  |
| 13 | 6 | 0 | 8.311494  | -0.740703 | 1.156198  |
| 14 | 6 | 0 | 7.442053  | -1.750287 | 0.744000  |
| 15 | 6 | 0 | 6.280399  | -1.425810 | 0.036204  |
| 16 | 7 | 0 | 0.196986  | 0.484846  | -0.079268 |
| 17 | 6 | 0 | -0.220624 | -0.786384 | -0.406533 |
| 18 | 8 | 0 | 0.523706  | -1.649270 | -0.866996 |
| 19 | 6 | 0 | -1.679901 | -1.062518 | -0.177665 |
| 20 | 6 | 0 | -2.457406 | -0.399333 | 0.783784  |
| 21 | 6 | 0 | -3.801156 | -0.723239 | 0.958361  |
| 22 | 6 | 0 | -4.378616 | -1.731091 | 0.173152  |
| 23 | 6 | 0 | -3.594621 | -2.436442 | -0.750881 |
| 24 | 6 | 0 | -2.263630 | -2.090560 | -0.934556 |
| 25 | 7 | 0 | -5.701087 | -2.217767 | 0.405963  |
| 26 | 6 | 0 | -6.696372 | -0.081804 | 0.221482  |
| 27 | 6 | 0 | -7.356844 | 0.788355  | 1.100408  |
| 28 | 6 | 0 | -7.565473 | 2.128371  | 0.814626  |
| 29 | 6 | 0 | -7.143525 | 2.621497  | -0.422584 |
| 30 | 6 | 0 | -6.517430 | 1.784839  | -1.347841 |
| 31 | 6 | 0 | -6.306516 | 0.454304  | -1.014282 |
| 32 | 7 | 0 | -6.706522 | -1.483571 | 0.523242  |
| 33 | 9 | 0 | -5.733422 | -0.365591 | -1.916876 |
| 34 | 9 | 0 | -7.758635 | 0.290193  | 2.284708  |
| 35 | 8 | 0 | 5.448191  | -2.412385 | -0.441160 |
| 36 | 6 | 0 | 4.618405  | -3.024775 | 0.550592  |
| 37 | 1 | 0 | 0.774147  | 2.973368  | 0.485689  |
| 38 | 1 | 0 | 2.988666  | 4.035757  | 0.412631  |
| 39 | 1 | 0 | 2.537865  | -0.738703 | -0.827176 |
| 40 | 1 | 0 | 5.314826  | 4.019419  | -0.296253 |
| 41 | 1 | 0 | 7.426997  | 3.024377  | -0.028394 |
| 42 | 1 | 0 | 8.697669  | 1.377229  | 1.191145  |
| 43 | 1 | 0 | 9.219593  | -0.994564 | 1.695586  |
| 44 | 1 | 0 | 7.662535  | -2.796064 | 0.938940  |
| 45 | 1 | 0 | -0.527274 | 1.144054  | 0.174851  |
| 46 | 1 | 0 | -2.017806 | 0.350288  | 1.436777  |
| 47 | 1 | 0 | -4.383759 | -0.225620 | 1.726610  |
| 48 | 1 | 0 | -4.046235 | -3.241806 | -1.322386 |
| 49 | 1 | 0 | -1.648044 | -2.622794 | -1.651811 |
| 50 | 1 | 0 | -8.055148 | 2.759935  | 1.548286  |
| 51 | 1 | 0 | -7.306788 | 3.666074  | -0.668358 |
| 52 | 1 | 0 | -6.198441 | 2.142799  | -2.321150 |
| 53 | 1 | 0 | 4.059957  | -3.812262 | 0.039773  |
| 54 | 1 | 0 | 5.216012  | -3.467612 | 1.357408  |

|    |   |   |          |           |          |
|----|---|---|----------|-----------|----------|
| 55 | 1 | 0 | 3.915255 | -2.299283 | 0.978950 |
|----|---|---|----------|-----------|----------|

---

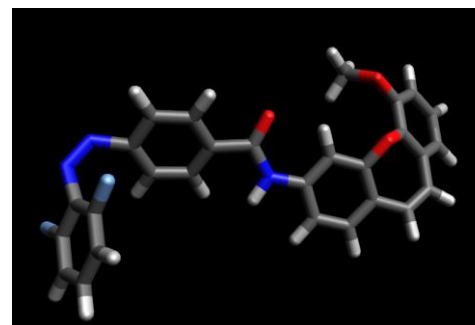

Visualization of calculated geometry of (**4dZ**) :

- The calculated coordinates of (**4eE**) ( the part of calculated log file) -

| Standard orientation: |                  |                |                         |           |           |
|-----------------------|------------------|----------------|-------------------------|-----------|-----------|
| Center<br>Number      | Atomic<br>Number | Atomic<br>Type | Coordinates (Angstroms) |           |           |
|                       |                  |                | X                       | Y         | Z         |
| 1                     | 6                | 0              | -1.399821               | -1.562378 | -0.248220 |
| 2                     | 6                | 0              | -1.702936               | -2.843196 | 0.242808  |
| 3                     | 6                | 0              | -3.021339               | -3.268014 | 0.316838  |
| 4                     | 6                | 0              | -4.095852               | -2.450640 | -0.081551 |
| 5                     | 6                | 0              | -3.760035               | -1.180992 | -0.587798 |
| 6                     | 6                | 0              | -2.447364               | -0.728251 | -0.667130 |
| 7                     | 6                | 0              | -5.467419               | -2.935060 | 0.049312  |
| 8                     | 6                | 0              | -6.588798               | -2.194309 | 0.187044  |
| 9                     | 6                | 0              | -6.694794               | -0.738343 | 0.229912  |
| 10                    | 6                | 0              | -5.747537               | 0.129656  | -0.355144 |
| 11                    | 8                | 0              | -4.722946               | -0.355767 | -1.160166 |
| 12                    | 6                | 0              | -7.780000               | -0.131863 | 0.882801  |
| 13                    | 6                | 0              | -7.923569               | 1.251110  | 0.983925  |
| 14                    | 6                | 0              | -6.953806               | 2.081378  | 0.407707  |
| 15                    | 6                | 0              | -5.863693               | 1.507601  | -0.265352 |
| 16                    | 8                | 0              | -6.979597               | 3.442270  | 0.430299  |
| 17                    | 7                | 0              | -0.043319               | -1.187170 | -0.291844 |
| 18                    | 6                | 0              | 0.515488                | -0.024132 | -0.772272 |
| 19                    | 8                | 0              | -0.135039               | 0.875893  | -1.301133 |
| 20                    | 6                | 0              | 2.006322                | 0.079545  | -0.622222 |
| 21                    | 6                | 0              | -8.069747               | 4.085095  | 1.084325  |
| 22                    | 6                | 0              | 2.685786                | 0.913086  | -1.521236 |
| 23                    | 6                | 0              | 4.064399                | 1.065874  | -1.432971 |

|    |   |   |           |           |           |
|----|---|---|-----------|-----------|-----------|
| 24 | 6 | 0 | 4.788133  | 0.400631  | -0.432860 |
| 25 | 6 | 0 | 4.110822  | -0.418828 | 0.486468  |
| 26 | 6 | 0 | 2.734678  | -0.574910 | 0.388526  |
| 27 | 7 | 0 | 6.187784  | 0.633068  | -0.434542 |
| 28 | 7 | 0 | 6.822765  | 0.020138  | 0.467546  |
| 29 | 6 | 0 | 8.220864  | 0.246919  | 0.476783  |
| 30 | 6 | 0 | 8.931641  | -0.438683 | 1.472572  |
| 31 | 6 | 0 | 10.313825 | -0.289852 | 1.575509  |
| 32 | 6 | 0 | 10.990116 | 0.545265  | 0.683865  |
| 33 | 6 | 0 | 10.281625 | 1.231903  | -0.312113 |
| 34 | 6 | 0 | 8.903747  | 1.087924  | -0.421066 |
| 35 | 1 | 0 | -0.902207 | -3.505667 | 0.563706  |
| 36 | 1 | 0 | -3.236836 | -4.262044 | 0.700712  |
| 37 | 1 | 0 | -2.243458 | 0.248679  | -1.078864 |
| 38 | 1 | 0 | -5.569455 | -4.016331 | 0.123964  |
| 39 | 1 | 0 | -7.520705 | -2.728898 | 0.363711  |
| 40 | 1 | 0 | -8.535922 | -0.770737 | 1.333305  |
| 41 | 1 | 0 | -8.782686 | 1.661995  | 1.500971  |
| 42 | 1 | 0 | -5.125874 | 2.145195  | -0.740454 |
| 43 | 1 | 0 | 0.603591  | -1.907966 | 0.001479  |
| 44 | 1 | 0 | -7.887238 | 5.156177  | 0.983471  |
| 45 | 1 | 0 | -9.026205 | 3.831965  | 0.610314  |
| 46 | 1 | 0 | -8.110209 | 3.820851  | 2.148324  |
| 47 | 1 | 0 | 2.116036  | 1.432352  | -2.284391 |
| 48 | 1 | 0 | 4.605481  | 1.699123  | -2.129792 |
| 49 | 1 | 0 | 4.675056  | -0.913115 | 1.269220  |
| 50 | 1 | 0 | 2.225792  | -1.185023 | 1.130871  |
| 51 | 1 | 0 | 8.379249  | -1.080941 | 2.152376  |
| 52 | 1 | 0 | 10.861139 | -0.822580 | 2.348085  |
| 53 | 1 | 0 | 12.067554 | 0.664259  | 0.761112  |
| 54 | 1 | 0 | 10.812619 | 1.880940  | -1.003467 |
| 55 | 1 | 0 | 8.339917  | 1.611121  | -1.185540 |

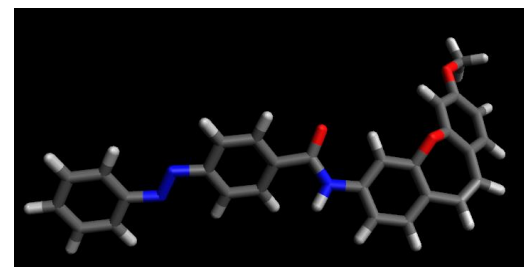

Visualization of calculated geometry of (**4eE**) :

- The calculated coordinates of (**4eZ**) ( the part of calculated log file) -  
Standard orientation:

-----

| Center | Atomic | Atomic | Coordinates (Angstroms) |
|--------|--------|--------|-------------------------|
|--------|--------|--------|-------------------------|

| Number | Number | Type | X         | Y         | Z         |
|--------|--------|------|-----------|-----------|-----------|
| 1      | 6      | 0    | -0.745372 | 1.100202  | 0.065066  |
| 2      | 6      | 0    | -0.853788 | 2.425042  | -0.388979 |
| 3      | 6      | 0    | -2.078956 | 3.074782  | -0.360116 |
| 4      | 6      | 0    | -3.248688 | 2.448327  | 0.109466  |
| 5      | 6      | 0    | -3.106155 | 1.126665  | 0.572270  |
| 6      | 6      | 0    | -1.890558 | 0.450996  | 0.550399  |
| 7      | 6      | 0    | -4.518890 | 3.169032  | 0.090196  |
| 8      | 6      | 0    | -5.760910 | 2.640907  | 0.030981  |
| 9      | 6      | 0    | -6.126280 | 1.227969  | -0.023042 |
| 10     | 6      | 0    | -5.305786 | 0.191344  | 0.471977  |
| 11     | 8      | 0    | -4.156077 | 0.467716  | 1.203958  |
| 12     | 6      | 0    | -7.346937 | 0.839734  | -0.598290 |
| 13     | 6      | 0    | -7.739453 | -0.493319 | -0.708551 |
| 14     | 6      | 0    | -6.890573 | -1.496654 | -0.224250 |
| 15     | 6      | 0    | -5.669207 | -1.142015 | 0.370184  |
| 16     | 8      | 0    | -7.158447 | -2.830803 | -0.265891 |
| 17     | 7      | 0    | 0.526702  | 0.498474  | 0.013961  |
| 18     | 6      | 0    | 0.903926  | -0.761352 | 0.421398  |
| 19     | 8      | 0    | 0.135701  | -1.562438 | 0.951582  |
| 20     | 6      | 0    | 2.348136  | -1.103292 | 0.194051  |
| 21     | 6      | 0    | -8.391188 | -3.252644 | -0.842042 |
| 22     | 6      | 0    | 3.137582  | -0.533024 | -0.817017 |
| 23     | 6      | 0    | 4.469316  | -0.904415 | -0.976086 |
| 24     | 6      | 0    | 5.029274  | -1.868771 | -0.124925 |
| 25     | 6      | 0    | 4.231592  | -2.485096 | 0.850348  |
| 26     | 6      | 0    | 2.911600  | -2.088394 | 1.019372  |
| 27     | 7      | 0    | 6.329477  | -2.428581 | -0.352161 |
| 28     | 6      | 0    | 7.452181  | -0.340721 | -0.289488 |
| 29     | 6      | 0    | 8.228374  | 0.391988  | -1.198516 |
| 30     | 6      | 0    | 8.444866  | 1.751902  | -0.987904 |
| 31     | 6      | 0    | 7.943697  | 2.371095  | 0.160527  |
| 32     | 6      | 0    | 7.216726  | 1.626019  | 1.093520  |
| 33     | 6      | 0    | 6.958863  | 0.274763  | 0.871483  |
| 34     | 7      | 0    | 7.368171  | -1.752726 | -0.523406 |

|    |   |   |           |           |           |
|----|---|---|-----------|-----------|-----------|
| 35 | 1 | 0 | 0.025275  | 2.945418  | -0.762601 |
| 36 | 1 | 0 | -2.143332 | 4.099688  | -0.716834 |
| 37 | 1 | 0 | -1.831780 | -0.556519 | 0.933701  |
| 38 | 1 | 0 | -4.432916 | 4.253046  | 0.038447  |
| 39 | 1 | 0 | -6.593865 | 3.335561  | -0.064763 |
| 40 | 1 | 0 | -8.009388 | 1.613690  | -0.978692 |
| 41 | 1 | 0 | -8.693471 | -0.732799 | -1.163182 |
| 42 | 1 | 0 | -5.021587 | -1.912056 | 0.775465  |
| 43 | 1 | 0 | 1.268347  | 1.107801  | -0.305400 |
| 44 | 1 | 0 | -8.393878 | -4.341743 | -0.774415 |
| 45 | 1 | 0 | -9.249152 | -2.850674 | -0.288938 |
| 46 | 1 | 0 | -8.464224 | -2.952455 | -1.894695 |
| 47 | 1 | 0 | 2.714839  | 0.181959  | -1.518564 |
| 48 | 1 | 0 | 5.064133  | -0.467533 | -1.771500 |
| 49 | 1 | 0 | 4.661586  | -3.266406 | 1.470556  |
| 50 | 1 | 0 | 2.288962  | -2.549655 | 1.778587  |
| 51 | 1 | 0 | 8.641364  | -0.114321 | -2.066476 |
| 52 | 1 | 0 | 9.023842  | 2.323164  | -1.708236 |
| 53 | 1 | 0 | 8.133071  | 3.426274  | 0.336876  |
| 54 | 1 | 0 | 6.848229  | 2.098729  | 1.999859  |
| 55 | 1 | 0 | 6.403710  | -0.303557 | 1.602667  |

Visualization of calculated geometry of (**4eZ**) :

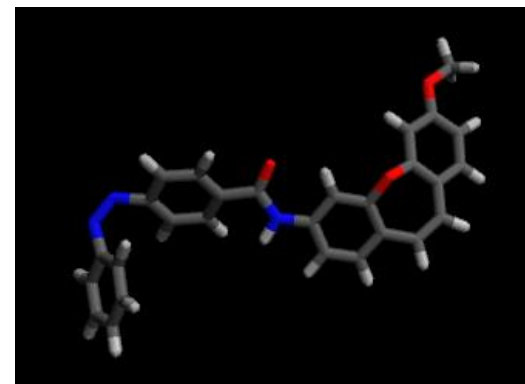

- The calculated coordinates of (**4fE**) ( the part of calculated log file) -

Standard orientation:

| Center<br>Number | Atomic<br>Number | Atomic<br>Type | Coordinates (Angstroms) |           |           |
|------------------|------------------|----------------|-------------------------|-----------|-----------|
|                  |                  |                | X                       | Y         | Z         |
| 1                | 6                | 0              | 1.821267                | -1.577878 | 0.248300  |
| 2                | 6                | 0              | 2.131184                | -2.850997 | -0.258309 |
| 3                | 6                | 0              | 3.452445                | -3.263989 | -0.346851 |
| 4                | 6                | 0              | 4.523238                | -2.441632 | 0.051283  |

|    |   |   |            |           |           |
|----|---|---|------------|-----------|-----------|
| 5  | 6 | 0 | 4.180887   | -1.179888 | 0.572707  |
| 6  | 6 | 0 | 2.865129   | -0.739212 | 0.667322  |
| 7  | 6 | 0 | 5.897724   | -2.913288 | -0.094911 |
| 8  | 6 | 0 | 7.011664   | -2.161810 | -0.234750 |
| 9  | 6 | 0 | 7.104782   | -0.704653 | -0.265107 |
| 10 | 6 | 0 | 6.155046   | 0.149696  | 0.335743  |
| 11 | 8 | 0 | 5.141581   | -0.351969 | 1.144927  |
| 12 | 6 | 0 | 8.178949   | -0.082878 | -0.921858 |
| 13 | 6 | 0 | 8.309381   | 1.302143  | -1.012086 |
| 14 | 6 | 0 | 7.337337   | 2.118658  | -0.420294 |
| 15 | 6 | 0 | 6.258277   | 1.529354  | 0.257157  |
| 16 | 8 | 0 | 7.350776   | 3.479877  | -0.431370 |
| 17 | 7 | 0 | 0.462067   | -1.214531 | 0.306564  |
| 18 | 6 | 0 | -0.102439  | -0.061500 | 0.804191  |
| 19 | 8 | 0 | 0.544695   | 0.837637  | 1.338697  |
| 20 | 6 | 0 | -1.595007  | 0.032227  | 0.665670  |
| 21 | 6 | 0 | 8.428072   | 4.138076  | -1.091407 |
| 22 | 6 | 0 | -2.274795  | 0.849546  | 1.579270  |
| 23 | 6 | 0 | -3.654989  | 0.993111  | 1.501837  |
| 24 | 6 | 0 | -4.380298  | 0.335297  | 0.497798  |
| 25 | 6 | 0 | -3.702918  | -0.467951 | -0.435803 |
| 26 | 6 | 0 | -2.325121  | -0.615194 | -0.348304 |
| 27 | 7 | 0 | -5.780891  | 0.557561  | 0.511124  |
| 28 | 7 | 0 | -6.417223  | -0.043438 | -0.398656 |
| 29 | 6 | 0 | -7.814104  | 0.172917  | -0.395203 |
| 30 | 6 | 0 | -8.528856  | -0.492792 | -1.402769 |
| 31 | 6 | 0 | -9.910860  | -0.355806 | -1.500911 |
| 32 | 6 | 0 | -10.558477 | 0.455855  | -0.576026 |
| 33 | 6 | 0 | -9.876229  | 1.131108  | 0.437752  |
| 34 | 6 | 0 | -8.498779  | 0.987785  | 0.526984  |
| 35 | 9 | 0 | -11.896133 | 0.598385  | -0.658541 |
| 36 | 1 | 0 | 1.333493   | -3.516902 | -0.579668 |
| 37 | 1 | 0 | 3.673135   | -4.252301 | -0.742366 |
| 38 | 1 | 0 | 2.656417   | 0.231663  | 1.090810  |
| 39 | 1 | 0 | 6.008176   | -3.992930 | -0.180400 |
| 40 | 1 | 0 | 7.946642   | -2.686747 | -0.423754 |
| 41 | 1 | 0 | 8.936496   | -0.711070 | -1.384486 |
| 42 | 1 | 0 | 9.160183   | 1.725190  | -1.533029 |
| 43 | 1 | 0 | 5.518882   | 2.156165  | 0.744009  |
| 44 | 1 | 0 | -0.181193  | -1.937430 | 0.010365  |
| 45 | 1 | 0 | 8.236315   | 5.206559  | -0.980614 |
| 46 | 1 | 0 | 9.391692   | 3.890744  | -0.628974 |
| 47 | 1 | 0 | 8.460280   | 3.882196  | -2.157726 |
| 48 | 1 | 0 | -1.703962  | 1.363704  | 2.345070  |
| 49 | 1 | 0 | -4.196128  | 1.613558  | 2.210024  |

|    |   |   |            |           |           |
|----|---|---|------------|-----------|-----------|
| 50 | 1 | 0 | -4.268086  | -0.956860 | -1.221255 |
| 51 | 1 | 0 | -1.816603  | -1.212502 | -1.101226 |
| 52 | 1 | 0 | -7.980008  | -1.115628 | -2.102589 |
| 53 | 1 | 0 | -10.483246 | -0.861090 | -2.272020 |
| 54 | 1 | 0 | -10.431273 | 1.752317  | 1.133896  |
| 55 | 1 | 0 | -7.935161  | 1.496555  | 1.300982  |

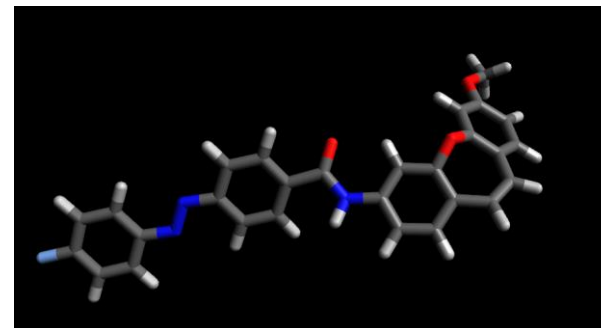

Visualization of calculated geometry of (**4fE**) :

- The calculated coordinates of (**4fZ**) ( the part of calculated log file) -

Standard orientation:

| Center<br>Number | Atomic<br>Number | Atomic<br>Type | Coordinates (Angstroms) |           |           |
|------------------|------------------|----------------|-------------------------|-----------|-----------|
|                  |                  |                | X                       | Y         | Z         |
| 1                | 6                | 0              | 0.995386                | 1.038660  | -0.034195 |
| 2                | 6                | 0              | 1.068717                | 2.355041  | 0.450824  |
| 3                | 6                | 0              | 2.275446                | 3.038805  | 0.434916  |
| 4                | 6                | 0              | 3.460925                | 2.455919  | -0.050920 |
| 5                | 6                | 0              | 3.353017                | 1.142848  | -0.546354 |
| 6                | 6                | 0              | 2.156663                | 0.433461  | -0.537651 |
| 7                | 6                | 0              | 4.711124                | 3.210229  | -0.016509 |
| 8                | 6                | 0              | 5.967062                | 2.714458  | 0.027815  |
| 9                | 6                | 0              | 6.370105                | 1.310924  | 0.047078  |
| 10               | 6                | 0              | 5.577115                | 0.265084  | -0.472716 |
| 11               | 8                | 0              | 4.418668                | 0.527940  | -1.195798 |
| 12               | 6                | 0              | 7.602196                | 0.941729  | 0.610350  |
| 13               | 6                | 0              | 8.030273                | -0.382670 | 0.688181  |
| 14               | 6                | 0              | 7.207648                | -1.396318 | 0.180649  |
| 15               | 6                | 0              | 5.976109                | -1.060126 | -0.403351 |
| 16               | 8                | 0              | 7.510206                | -2.723603 | 0.190592  |
| 17               | 7                | 0              | -0.257804               | 0.398007  | 0.012520  |
| 18               | 6                | 0              | -0.607144               | -0.850025 | -0.452120 |
| 19               | 8                | 0              | 0.171979                | -1.597322 | -1.041697 |
| 20               | 6                | 0              | -2.032200               | -1.253527 | -0.205365 |
| 21               | 6                | 0              | 8.753452                | -3.127219 | 0.757143  |

|    |   |   |           |           |           |
|----|---|---|-----------|-----------|-----------|
| 22 | 6 | 0 | -2.824356 | -0.739461 | 0.833211  |
| 23 | 6 | 0 | -4.135265 | -1.171920 | 1.010667  |
| 24 | 6 | 0 | -4.670153 | -2.143735 | 0.152076  |
| 25 | 6 | 0 | -3.867054 | -2.705480 | -0.851138 |
| 26 | 6 | 0 | -2.568963 | -2.248425 | -1.037083 |
| 27 | 7 | 0 | -5.940288 | -2.760156 | 0.399535  |
| 28 | 6 | 0 | -7.162275 | -0.728591 | 0.328158  |
| 29 | 6 | 0 | -8.018067 | -0.048151 | 1.207496  |
| 30 | 6 | 0 | -8.313121 | 1.296549  | 1.004912  |
| 31 | 6 | 0 | -7.793469 | 1.926373  | -0.121797 |
| 32 | 6 | 0 | -6.989400 | 1.260100  | -1.042405 |
| 33 | 6 | 0 | -6.663871 | -0.072932 | -0.809941 |
| 34 | 9 | 0 | -8.094787 | 3.222158  | -0.340950 |
| 35 | 7 | 0 | -7.008812 | -2.131980 | 0.570397  |
| 36 | 1 | 0 | 0.176412  | 2.842456  | 0.837287  |
| 37 | 1 | 0 | 2.312234  | 4.056763  | 0.814654  |
| 38 | 1 | 0 | 2.125324  | -0.564876 | -0.947054 |
| 39 | 1 | 0 | 4.596187  | 4.289879  | 0.062583  |
| 40 | 1 | 0 | 6.781245  | 3.428645  | 0.139623  |
| 41 | 1 | 0 | 8.244786  | 1.723696  | 1.007997  |
| 42 | 1 | 0 | 8.991610  | -0.607245 | 1.134880  |
| 43 | 1 | 0 | 5.348969  | -1.837133 | -0.827019 |
| 44 | 1 | 0 | -1.010363 | 0.971375  | 0.370635  |
| 45 | 1 | 0 | 8.784665  | -4.213848 | 0.662440  |
| 46 | 1 | 0 | 9.600905  | -2.689477 | 0.215158  |
| 47 | 1 | 0 | 8.818244  | -2.851554 | 1.817009  |
| 48 | 1 | 0 | -2.419944 | -0.020969 | 1.541729  |
| 49 | 1 | 0 | -4.732088 | -0.777225 | 1.826612  |
| 50 | 1 | 0 | -4.275501 | -3.491740 | -1.479571 |
| 51 | 1 | 0 | -1.942338 | -2.667902 | -1.816887 |
| 52 | 1 | 0 | -8.435196 | -0.583102 | 2.055560  |
| 53 | 1 | 0 | -8.951832 | 1.848319  | 1.687052  |
| 54 | 1 | 0 | -6.630806 | 1.783959  | -1.922747 |
| 55 | 1 | 0 | -6.047323 | -0.606255 | -1.524923 |

---

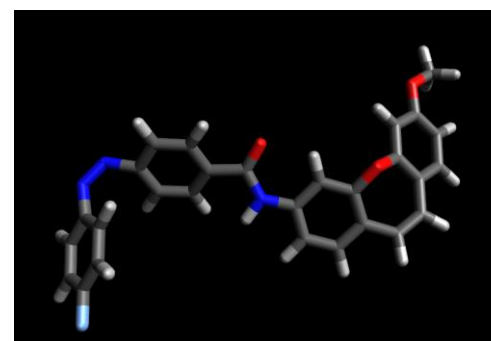

Visualization of calculated geometry of (**4fZ**) :

- The calculated coordinates of (**4gE**) ( the part of calculated log file) -

| Standard orientation: |                  |                |                         |           |           |
|-----------------------|------------------|----------------|-------------------------|-----------|-----------|
| Center<br>Number      | Atomic<br>Number | Atomic<br>Type | Coordinates (Angstroms) |           |           |
|                       |                  |                | X                       | Y         | Z         |
| 1                     | 6                | 0              | -2.088998               | -1.588439 | -0.297994 |
| 2                     | 6                | 0              | -2.404304               | -2.875484 | 0.168516  |
| 3                     | 6                | 0              | -3.727385               | -3.284846 | 0.246026  |
| 4                     | 6                | 0              | -4.794739               | -2.445104 | -0.124095 |
| 5                     | 6                | 0              | -4.447055               | -1.169100 | -0.605718 |
| 6                     | 6                | 0              | -3.129318               | -0.731961 | -0.688775 |
| 7                     | 6                | 0              | -6.171374               | -2.914408 | 0.009035  |
| 8                     | 6                | 0              | -7.281239               | -2.162247 | 0.175343  |
| 9                     | 6                | 0              | -7.366294               | -0.706416 | 0.254393  |
| 10                    | 6                | 0              | -6.412943               | 0.161950  | -0.320037 |
| 11                    | 8                | 0              | -5.405076               | -0.318787 | -1.148834 |
| 12                    | 6                | 0              | -8.434987               | -0.100713 | 0.934664  |
| 13                    | 6                | 0              | -8.556319               | 1.281252  | 1.072250  |
| 14                    | 6                | 0              | -7.580376               | 2.111341  | 0.506247  |
| 15                    | 6                | 0              | -6.506973               | 1.538739  | -0.194116 |
| 16                    | 8                | 0              | -7.584859               | 3.471406  | 0.564292  |
| 17                    | 7                | 0              | -0.728225               | -1.229582 | -0.345837 |
| 18                    | 6                | 0              | -0.158240               | -0.065746 | -0.811012 |
| 19                    | 8                | 0              | -0.800631               | 0.850587  | -1.321409 |
| 20                    | 6                | 0              | 1.334537                | 0.017417  | -0.667297 |
| 21                    | 6                | 0              | -8.656147               | 4.113256  | 1.249683  |
| 22                    | 6                | 0              | 2.021078                | 0.852281  | -1.559659 |
| 23                    | 6                | 0              | 3.401916                | 0.986326  | -1.475136 |
| 24                    | 6                | 0              | 4.120669                | 0.302261  | -0.484009 |
| 25                    | 6                | 0              | 3.436402                | -0.519207 | 0.428423  |
| 26                    | 6                | 0              | 2.058221                | -0.657599 | 0.333225  |
| 27                    | 7                | 0              | 5.523571                | 0.520137  | -0.491764 |
| 28                    | 7                | 0              | 6.142567                | -0.098639 | 0.420375  |
| 29                    | 6                | 0              | 7.537810                | 0.070269  | 0.473648  |
| 30                    | 6                | 0              | 8.170533                | -0.636129 | 1.514815  |
| 31                    | 6                | 0              | 9.543000                | -0.586165 | 1.719786  |
| 32                    | 6                | 0              | 10.302327               | 0.195158  | 0.853849  |
| 33                    | 6                | 0              | 9.735584                | 0.915138  | -0.193416 |
| 34                    | 6                | 0              | 8.361641                | 0.846411  | -0.373659 |
| 35                    | 9                | 0              | 11.633434               | 0.262725  | 1.027737  |
| 36                    | 9                | 0              | 7.840966                | 1.547797  | -1.388552 |
| 37                    | 1                | 0              | -1.609314               | -3.554993 | 0.467306  |

|    |   |   |           |           |           |
|----|---|---|-----------|-----------|-----------|
| 38 | 1 | 0 | -3.952255 | -4.284154 | 0.610316  |
| 39 | 1 | 0 | -2.916458 | 0.250734  | -1.081858 |
| 40 | 1 | 0 | -6.287181 | -3.995701 | 0.059286  |
| 41 | 1 | 0 | -8.218618 | -2.688303 | 0.348672  |
| 42 | 1 | 0 | -9.195311 | -0.739492 | 1.377831  |
| 43 | 1 | 0 | -9.403275 | 1.691733  | 1.609337  |
| 44 | 1 | 0 | -5.764821 | 2.177074  | -0.661405 |
| 45 | 1 | 0 | -0.088185 | -1.963435 | -0.070338 |
| 46 | 1 | 0 | -8.457599 | 5.183673  | 1.175683  |
| 47 | 1 | 0 | -9.622493 | 3.888429  | 0.781473  |
| 48 | 1 | 0 | -8.687494 | 3.820489  | 2.306499  |
| 49 | 1 | 0 | 1.455219  | 1.387207  | -2.314883 |
| 50 | 1 | 0 | 3.949043  | 1.619624  | -2.167023 |
| 51 | 1 | 0 | 3.996119  | -1.029487 | 1.204095  |
| 52 | 1 | 0 | 1.544182  | -1.270163 | 1.069964  |
| 53 | 1 | 0 | 7.535577  | -1.231373 | 2.163390  |
| 54 | 1 | 0 | 10.023664 | -1.132521 | 2.523952  |
| 55 | 1 | 0 | 10.346582 | 1.517487  | -0.856658 |

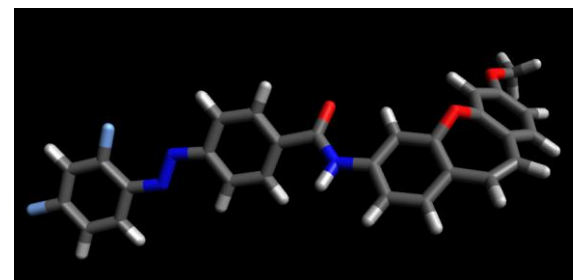

Visualization of calculated geometry of (**4gE**) :

- The calculated coordinates of (**4gZ**) ( the part of calculated log file) -

| Standard orientation: |                  |                |                         |          |           |
|-----------------------|------------------|----------------|-------------------------|----------|-----------|
| Center<br>Number      | Atomic<br>Number | Atomic<br>Type | Coordinates (Angstroms) |          |           |
|                       |                  |                | X                       | Y        | Z         |
| 1                     | 6                | 0              | -1.172407               | 1.047038 | 0.015728  |
| 2                     | 6                | 0              | -1.251608               | 2.373178 | -0.440692 |
| 3                     | 6                | 0              | -2.459615               | 3.053744 | -0.401276 |
| 4                     | 6                | 0              | -3.640198               | 2.458273 | 0.081297  |
| 5                     | 6                | 0              | -3.525882               | 1.135670 | 0.549301  |
| 6                     | 6                | 0              | -2.328356               | 0.428930 | 0.515714  |
| 7                     | 6                | 0              | -4.892183               | 3.210208 | 0.070131  |
| 8                     | 6                | 0              | -6.147517               | 2.712794 | 0.026849  |

|    |   |   |           |           |           |
|----|---|---|-----------|-----------|-----------|
| 9  | 6 | 0 | -6.549151 | 1.309319  | -0.012025 |
| 10 | 6 | 0 | -5.750373 | 0.255461  | 0.482274  |
| 11 | 8 | 0 | -4.583989 | 0.505962  | 1.196725  |
| 12 | 6 | 0 | -7.787309 | 0.948695  | -0.567579 |
| 13 | 6 | 0 | -8.216513 | -0.374300 | -0.661199 |
| 14 | 6 | 0 | -7.388584 | -1.395676 | -0.178378 |
| 15 | 6 | 0 | -6.150437 | -1.068499 | 0.396706  |
| 16 | 8 | 0 | -7.691936 | -2.722512 | -0.204579 |
| 17 | 7 | 0 | 0.082305  | 0.410887  | -0.052152 |
| 18 | 6 | 0 | 0.429810  | -0.858240 | 0.351318  |
| 19 | 8 | 0 | -0.350970 | -1.634492 | 0.899732  |
| 20 | 6 | 0 | 1.857147  | -1.249187 | 0.092047  |
| 21 | 6 | 0 | -8.942652 | -3.116888 | -0.761178 |
| 22 | 6 | 0 | 2.654979  | -0.680894 | -0.912409 |
| 23 | 6 | 0 | 3.967884  | -1.103915 | -1.104068 |
| 24 | 6 | 0 | 4.494804  | -2.120376 | -0.294666 |
| 25 | 6 | 0 | 3.685687  | -2.734452 | 0.672248  |
| 26 | 6 | 0 | 2.387569  | -2.287715 | 0.873862  |
| 27 | 7 | 0 | 5.770309  | -2.712752 | -0.545548 |
| 28 | 6 | 0 | 6.941063  | -0.654606 | -0.465318 |
| 29 | 6 | 0 | 7.676394  | 0.098462  | -1.393502 |
| 30 | 6 | 0 | 7.936787  | 1.448821  | -1.185475 |
| 31 | 6 | 0 | 7.505360  | 2.029809  | 0.004014  |
| 32 | 6 | 0 | 6.825675  | 1.310283  | 0.980616  |
| 33 | 6 | 0 | 6.553845  | -0.026444 | 0.727470  |
| 34 | 9 | 0 | 7.767764  | 3.329816  | 0.231190  |
| 35 | 7 | 0 | 6.827724  | -2.063154 | -0.707762 |
| 36 | 9 | 0 | 5.926800  | -0.743091 | 1.679107  |
| 37 | 1 | 0 | -0.363377 | 2.870199  | -0.824259 |
| 38 | 1 | 0 | -2.501548 | 4.079197  | -0.759719 |
| 39 | 1 | 0 | -2.291232 | -0.578141 | 0.902747  |
| 40 | 1 | 0 | -4.779991 | 4.291259  | 0.008241  |
| 41 | 1 | 0 | -6.963681 | 3.427432  | -0.066026 |
| 42 | 1 | 0 | -8.434337 | 1.736740  | -0.945548 |
| 43 | 1 | 0 | -9.182776 | -0.591843 | -1.100721 |
| 44 | 1 | 0 | -5.518665 | -1.851921 | 0.801266  |
| 45 | 1 | 0 | 0.835047  | 0.999978  | -0.383184 |
| 46 | 1 | 0 | -8.973477 | -4.204781 | -0.682282 |
| 47 | 1 | 0 | -9.782711 | -2.686731 | -0.201883 |
| 48 | 1 | 0 | -9.020761 | -2.825358 | -1.815878 |
| 49 | 1 | 0 | 2.254763  | 0.072544  | -1.586051 |
| 50 | 1 | 0 | 4.564605  | -0.673016 | -1.901042 |
| 51 | 1 | 0 | 4.092936  | -3.550133 | 1.262252  |
| 52 | 1 | 0 | 1.755172  | -2.746537 | 1.626234  |
| 53 | 1 | 0 | 8.025370  | -0.396064 | -2.295206 |

|    |   |   |          |          |           |
|----|---|---|----------|----------|-----------|
| 54 | 1 | 0 | 8.479847 | 2.042162 | -1.913180 |
| 55 | 1 | 0 | 6.521221 | 1.770993 | 1.913909  |

---

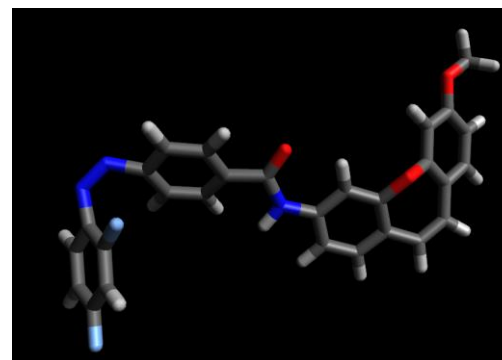

Visualization of calculated geometry of (**4gZ**) :

- The calculated coordinates of (**4hE**) ( the part of calculated log file) -

Standard orientation:

| Center<br>Number | Atomic<br>Number | Atomic<br>Type | Coordinates (Angstroms) |           |           |
|------------------|------------------|----------------|-------------------------|-----------|-----------|
|                  |                  |                | X                       | Y         | Z         |
| 1                | 6                | 0              | -1.936176               | -1.533954 | -0.413642 |
| 2                | 6                | 0              | -2.233276               | -2.851716 | -0.027994 |
| 3                | 6                | 0              | -3.550632               | -3.282950 | 0.025170  |
| 4                | 6                | 0              | -4.629846               | -2.436498 | -0.291549 |
| 5                | 6                | 0              | -4.300094               | -1.128698 | -0.693880 |
| 6                | 6                | 0              | -2.988587               | -0.669185 | -0.749951 |
| 7                | 6                | 0              | -5.999861               | -2.931506 | -0.186699 |
| 8                | 6                | 0              | -7.119765               | -2.205925 | 0.024641  |
| 9                | 6                | 0              | -7.225234               | -0.758843 | 0.191226  |
| 10               | 6                | 0              | -6.284083               | 0.155844  | -0.328999 |
| 11               | 8                | 0              | -5.269727               | -0.259939 | -1.184517 |
| 12               | 6                | 0              | -8.302629               | -0.210207 | 0.905333  |
| 13               | 6                | 0              | -8.443463               | 1.159162  | 1.125459  |
| 14               | 6                | 0              | -7.478868               | 2.035399  | 0.611931  |
| 15               | 6                | 0              | -6.397318               | 1.521105  | -0.120429 |
| 16               | 8                | 0              | -7.502537               | 3.389289  | 0.751917  |
| 17               | 7                | 0              | -0.580181               | -1.154941 | -0.441989 |
| 18               | 6                | 0              | -0.028508               | 0.048578  | -0.819104 |
| 19               | 8                | 0              | -0.686392               | 0.993727  | -1.251206 |
| 20               | 6                | 0              | 1.464724                | 0.140629  | -0.682029 |
| 21               | 6                | 0              | -8.582332               | 3.973259  | 1.474711  |
| 22               | 6                | 0              | 2.129463                | 1.057112  | -1.508300 |
| 23               | 6                | 0              | 3.509019                | 1.204658  | -1.426175 |
| 24               | 6                | 0              | 4.247746                | 0.450271  | -0.503216 |
| 25               | 6                | 0              | 3.585756                | -0.454628 | 0.344599  |
| 26               | 6                | 0              | 2.208729                | -0.604642 | 0.251795  |

|    |   |   |           |           |           |
|----|---|---|-----------|-----------|-----------|
| 27 | 7 | 0 | 5.646671  | 0.689220  | -0.505984 |
| 28 | 7 | 0 | 6.283115  | -0.007608 | 0.335862  |
| 29 | 6 | 0 | 7.671993  | 0.183049  | 0.390351  |
| 30 | 6 | 0 | 8.361021  | -0.638815 | 1.309416  |
| 31 | 6 | 0 | 9.732884  | -0.583854 | 1.500806  |
| 32 | 6 | 0 | 10.474384 | 0.330192  | 0.751741  |
| 33 | 6 | 0 | 9.847781  | 1.170732  | -0.170401 |
| 34 | 6 | 0 | 8.473266  | 1.091086  | -0.341321 |
| 35 | 9 | 0 | 7.907216  | 1.916183  | -1.232071 |
| 36 | 9 | 0 | 7.648209  | -1.518123 | 2.030375  |
| 37 | 1 | 0 | -1.428729 | -3.537616 | 0.227460  |
| 38 | 1 | 0 | -3.761427 | -4.305775 | 0.327257  |
| 39 | 1 | 0 | -2.789559 | 0.338922  | -1.080887 |
| 40 | 1 | 0 | -6.101066 | -4.015317 | -0.201748 |
| 41 | 1 | 0 | -8.049623 | -2.754426 | 0.165832  |
| 42 | 1 | 0 | -9.054196 | -0.885059 | 1.308137  |
| 43 | 1 | 0 | -9.296652 | 1.524674  | 1.684747  |
| 44 | 1 | 0 | -5.664010 | 2.196736  | -0.547518 |
| 45 | 1 | 0 | 0.070480  | -1.899046 | -0.225193 |
| 46 | 1 | 0 | -8.399502 | 5.048971  | 1.464800  |
| 47 | 1 | 0 | -9.545775 | 3.762682  | 0.994108  |
| 48 | 1 | 0 | -8.608097 | 3.617353  | 2.512107  |
| 49 | 1 | 0 | 1.547721  | 1.644863  | -2.210249 |
| 50 | 1 | 0 | 4.039487  | 1.902024  | -2.067562 |
| 51 | 1 | 0 | 4.162422  | -1.018853 | 1.068791  |
| 52 | 1 | 0 | 1.711868  | -1.283881 | 0.940182  |
| 53 | 1 | 0 | 10.196408 | -1.246937 | 2.223219  |
| 54 | 1 | 0 | 11.550001 | 0.389660  | 0.886785  |
| 55 | 1 | 0 | 10.406852 | 1.889256  | -0.760710 |

Visualization of calculated geometry of (**4hE**) :

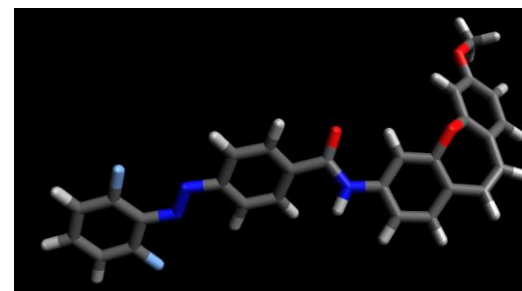

- The calculated coordinates of (**4hZ**) ( the part of calculated log file) -

Standard orientation:

| Center<br>Number | Atomic<br>Number | Atomic<br>Type | Coordinates (Angstroms) |          |           |
|------------------|------------------|----------------|-------------------------|----------|-----------|
|                  |                  |                | X                       | Y        | Z         |
| 1                | 6                | 0              | 1.222293                | 1.126777 | -0.057057 |
| 2                | 6                | 0              | 1.338397                | 2.455355 | 0.383813  |
| 3                | 6                | 0              | 2.568953                | 3.094873 | 0.354749  |

|    |   |   |           |           |           |
|----|---|---|-----------|-----------|-----------|
| 4  | 6 | 0 | 3.736107  | 2.454892  | -0.102858 |
| 5  | 6 | 0 | 3.585278  | 1.130527  | -0.555299 |
| 6  | 6 | 0 | 2.364637  | 0.464108  | -0.530431 |
| 7  | 6 | 0 | 5.011246  | 3.166618  | -0.084653 |
| 8  | 6 | 0 | 6.249504  | 2.630424  | -0.019574 |
| 9  | 6 | 0 | 6.606328  | 1.215697  | 0.041865  |
| 10 | 6 | 0 | 5.780282  | 0.180685  | -0.447385 |
| 11 | 8 | 0 | 4.630508  | 0.457169  | -1.178948 |
| 12 | 6 | 0 | 7.826514  | 0.824222  | 0.615990  |
| 13 | 6 | 0 | 8.212974  | -0.510102 | 0.732135  |
| 14 | 6 | 0 | 7.358603  | -1.511600 | 0.253816  |
| 15 | 6 | 0 | 6.137517  | -1.153851 | -0.339338 |
| 16 | 8 | 0 | 7.620282  | -2.846732 | 0.300819  |
| 17 | 7 | 0 | -0.053344 | 0.532104  | 0.001144  |
| 18 | 6 | 0 | -0.443121 | -0.715523 | -0.429049 |
| 19 | 8 | 0 | 0.315210  | -1.512004 | -0.979687 |
| 20 | 6 | 0 | -1.887084 | -1.059264 | -0.192488 |
| 21 | 6 | 0 | 8.852874  | -3.271656 | 0.875095  |
| 22 | 6 | 0 | -2.682994 | -0.464698 | 0.798344  |
| 23 | 6 | 0 | -4.011014 | -0.847770 | 0.968993  |
| 24 | 6 | 0 | -4.553784 | -1.849585 | 0.152562  |
| 25 | 6 | 0 | -3.749782 | -2.490019 | -0.800806 |
| 26 | 6 | 0 | -2.435816 | -2.082449 | -0.981783 |
| 27 | 7 | 0 | -5.853594 | -2.396033 | 0.380576  |
| 28 | 6 | 0 | -6.927700 | -0.298260 | 0.229896  |
| 29 | 6 | 0 | -7.608315 | 0.537393  | 1.126286  |
| 30 | 6 | 0 | -7.867614 | 1.872357  | 0.858475  |
| 31 | 6 | 0 | -7.477661 | 2.394200  | -0.377480 |
| 32 | 6 | 0 | -6.832007 | 1.591199  | -1.318995 |
| 33 | 6 | 0 | -6.570543 | 0.265314  | -1.003274 |
| 34 | 7 | 0 | -6.886705 | -1.704384 | 0.510910  |
| 35 | 9 | 0 | -5.980199 | -0.524210 | -1.921667 |
| 36 | 9 | 0 | -7.978061 | 0.011599  | 2.309237  |
| 37 | 1 | 0 | 0.461433  | 2.986637  | 0.746774  |
| 38 | 1 | 0 | 2.639593  | 4.123051  | 0.700638  |
| 39 | 1 | 0 | 2.300170  | -0.545736 | -0.906440 |
| 40 | 1 | 0 | 4.932716  | 4.251392  | -0.037977 |
| 41 | 1 | 0 | 7.086599  | 3.320226  | 0.074899  |
| 42 | 1 | 0 | 8.493795  | 1.596836  | 0.990580  |
| 43 | 1 | 0 | 9.167180  | -0.751772 | 1.185167  |
| 44 | 1 | 0 | 5.485996  | -1.922624 | -0.740721 |
| 45 | 1 | 0 | -0.788347 | 1.145859  | 0.327149  |
| 46 | 1 | 0 | 8.851224  | -4.360925 | 0.810505  |
| 47 | 1 | 0 | 9.710959  | -2.874497 | 0.318774  |
| 48 | 1 | 0 | 8.929643  | -2.968840 | 1.926712  |

|    |   |   |           |           |           |
|----|---|---|-----------|-----------|-----------|
| 49 | 1 | 0 | -2.270801 | 0.276452  | 1.478262  |
| 50 | 1 | 0 | -4.607145 | -0.401384 | 1.758014  |
| 51 | 1 | 0 | -4.172418 | -3.293286 | -1.396848 |
| 52 | 1 | 0 | -1.805391 | -2.560855 | -1.723436 |
| 53 | 1 | 0 | -8.370377 | 2.478019  | 1.605017  |
| 54 | 1 | 0 | -7.681469 | 3.434833  | -0.609356 |
| 55 | 1 | 0 | -6.535954 | 1.971664  | -2.291004 |

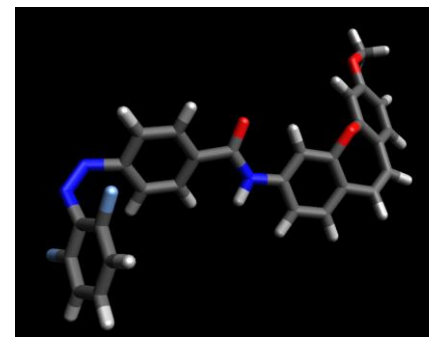

Visualization of calculated geometry of (**4hZ**) :

- The calculated coordinates of (**5aE**) ( the part of calculated log file) -

Standard orientation:

| Center<br>Number | Atomic<br>Number | Atomic<br>Type | Coordinates (Angstroms) |           |           |
|------------------|------------------|----------------|-------------------------|-----------|-----------|
|                  |                  |                | X                       | Y         | Z         |
| 1                | 6                | 0              | -1.639195               | -1.939536 | -0.387790 |
| 2                | 6                | 0              | -2.406608               | -3.085438 | -0.659453 |
| 3                | 6                | 0              | -3.740965               | -2.965269 | -1.019415 |
| 4                | 6                | 0              | -4.374222               | -1.712784 | -1.119315 |
| 5                | 6                | 0              | -3.574899               | -0.583420 | -0.862458 |
| 6                | 6                | 0              | -2.237759               | -0.674703 | -0.492595 |
| 7                | 6                | 0              | -5.788976               | -1.625980 | -1.472968 |
| 8                | 6                | 0              | -6.656297               | -0.641243 | -1.150417 |
| 9                | 6                | 0              | -6.382307               | 0.553919  | -0.349640 |
| 10               | 6                | 0              | -5.104162               | 1.123848  | -0.270884 |
| 11               | 8                | 0              | -4.075207               | 0.691494  | -1.098301 |
| 12               | 6                | 0              | -7.422137               | 1.144614  | 0.397050  |
| 13               | 6                | 0              | -7.174430               | 2.244663  | 1.207068  |
| 14               | 6                | 0              | -5.890357               | 2.791756  | 1.298559  |
| 15               | 6                | 0              | -4.842140               | 2.231374  | 0.559058  |
| 16               | 7                | 0              | -0.293997               | -2.134368 | -0.019148 |
| 17               | 6                | 0              | 0.680048                | -1.191136 | 0.221873  |

|    |   |   |           |           |           |
|----|---|---|-----------|-----------|-----------|
| 18 | 8 | 0 | 0.502789  | 0.018342  | 0.097188  |
| 19 | 6 | 0 | 2.013873  | -1.745186 | 0.644727  |
| 20 | 6 | 0 | 3.140429  | -0.970720 | 0.364036  |
| 21 | 6 | 0 | 4.414609  | -1.418157 | 0.739126  |
| 22 | 6 | 0 | 4.553829  | -2.638067 | 1.415959  |
| 23 | 6 | 0 | 3.428873  | -3.403431 | 1.716465  |
| 24 | 6 | 0 | 2.162412  | -2.962809 | 1.333279  |
| 25 | 7 | 0 | 5.624332  | -0.714879 | 0.491825  |
| 26 | 7 | 0 | 5.483107  | 0.369855  | -0.135376 |
| 27 | 6 | 0 | 6.684074  | 1.080994  | -0.382994 |
| 28 | 6 | 0 | 6.531645  | 2.287292  | -1.081263 |
| 29 | 6 | 0 | 7.645953  | 3.069780  | -1.380658 |
| 30 | 6 | 0 | 8.916531  | 2.648970  | -0.982953 |
| 31 | 6 | 0 | 9.071125  | 1.443325  | -0.284644 |
| 32 | 6 | 0 | 7.964664  | 0.658325  | 0.017296  |
| 33 | 8 | 0 | -3.559622 | 2.688735  | 0.555777  |
| 34 | 6 | 0 | -3.246425 | 3.799325  | 1.388590  |
| 35 | 1 | 0 | -1.952088 | -4.071175 | -0.589829 |
| 36 | 1 | 0 | -4.318617 | -3.863253 | -1.224013 |
| 37 | 1 | 0 | -1.673258 | 0.227904  | -0.313090 |
| 38 | 1 | 0 | -6.191187 | -2.497299 | -1.987564 |
| 39 | 1 | 0 | -7.699717 | -0.782631 | -1.426330 |
| 40 | 1 | 0 | -8.420087 | 0.718472  | 0.339042  |
| 41 | 1 | 0 | -7.982845 | 2.691120  | 1.779410  |
| 42 | 1 | 0 | -5.718228 | 3.653883  | 1.932508  |
| 43 | 1 | 0 | 0.007576  | -3.100384 | -0.017214 |
| 44 | 1 | 0 | 3.030512  | -0.021173 | -0.145322 |
| 45 | 1 | 0 | 5.550288  | -2.961749 | 1.701896  |
| 46 | 1 | 0 | 3.535279  | -4.339467 | 2.256732  |
| 47 | 1 | 0 | 1.293080  | -3.555413 | 1.606598  |
| 48 | 1 | 0 | 5.531485  | 2.589586  | -1.378041 |
| 49 | 1 | 0 | 7.523579  | 4.003720  | -1.922005 |
| 50 | 1 | 0 | 9.787730  | 3.256018  | -1.214278 |
| 51 | 1 | 0 | 10.062084 | 1.119880  | 0.022990  |
| 52 | 1 | 0 | 8.066206  | -0.276937 | 0.556857  |
| 53 | 1 | 0 | -2.180869 | 3.985702  | 1.244881  |
| 54 | 1 | 0 | -3.814293 | 4.692524  | 1.098612  |
| 55 | 1 | 0 | -3.437520 | 3.576006  | 2.445913  |

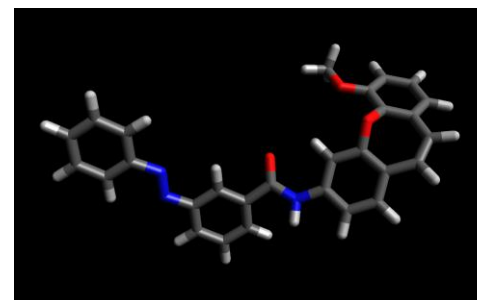

Visualization of calculated geometry of (**5aE**):

- The calculated coordinates of (**5aZ**) ( the part of calculated log file) -

Standard orientation:

| Center<br>Number | Atomic<br>Number | Atomic<br>Type | Coordinates (Angstroms) |           |           |
|------------------|------------------|----------------|-------------------------|-----------|-----------|
|                  |                  |                | X                       | Y         | Z         |
| 1                | 6                | 0              | -1.482415               | -1.894340 | 0.090300  |
| 2                | 6                | 0              | -2.114775               | -3.046928 | 0.587593  |
| 3                | 6                | 0              | -3.498589               | -3.143181 | 0.583064  |
| 4                | 6                | 0              | -4.314593               | -2.106075 | 0.094920  |
| 5                | 6                | 0              | -3.652499               | -0.973112 | -0.413587 |
| 6                | 6                | 0              | -2.267823               | -0.846288 | -0.413469 |
| 7                | 6                | 0              | -5.769473               | -2.233948 | 0.127625  |
| 8                | 6                | 0              | -6.680153               | -1.237031 | 0.177727  |
| 9                | 6                | 0              | -6.416833               | 0.202249  | 0.238628  |
| 10               | 6                | 0              | -5.249799               | 0.771903  | -0.288938 |
| 11               | 8                | 0              | -4.372867               | 0.022001  | -1.063003 |
| 12               | 6                | 0              | -7.344712               | 1.052133  | 0.874441  |
| 13               | 6                | 0              | -7.091297               | 2.411842  | 0.994871  |
| 14               | 6                | 0              | -5.912671               | 2.967821  | 0.487024  |
| 15               | 6                | 0              | -4.979551               | 2.148178  | -0.159054 |
| 16               | 7                | 0              | -0.074818               | -1.862324 | 0.128391  |
| 17               | 6                | 0              | 0.779462                | -0.908867 | -0.377521 |
| 18               | 8                | 0              | 0.403260                | 0.086666  | -0.991989 |
| 19               | 6                | 0              | 2.241939                | -1.172147 | -0.143100 |
| 20               | 6                | 0              | 3.139686                | -0.610402 | -1.057217 |
| 21               | 6                | 0              | 4.516611                | -0.775417 | -0.890527 |
| 22               | 6                | 0              | 5.007450                | -1.553222 | 0.169805  |
| 23               | 6                | 0              | 4.112726                | -2.122234 | 1.072634  |
| 24               | 6                | 0              | 2.737761                | -1.924979 | 0.931665  |
| 25               | 7                | 0              | 5.357874                | -0.294667 | -1.952685 |
| 26               | 7                | 0              | 6.426910                | 0.328647  | -1.770142 |
| 27               | 6                | 0              | 6.859550                | 0.826856  | -0.495383 |
| 28               | 6                | 0              | 6.031544                | 1.577029  | 0.353473  |
| 29               | 6                | 0              | 6.570101                | 2.156235  | 1.501013  |
| 30               | 6                | 0              | 7.919663                | 1.977688  | 1.818062  |
| 31               | 6                | 0              | 8.744464                | 1.241317  | 0.963183  |
| 32               | 6                | 0              | 8.224700                | 0.692040  | -0.207050 |
| 33               | 8                | 0              | -3.809978               | 2.580999  | -0.705856 |
| 34               | 6                | 0              | -3.486422               | 3.961075  | -0.579762 |
| 35               | 1                | 0              | -1.517086               | -3.869273 | 0.974375  |
| 36               | 1                | 0              | -3.969480               | -4.042381 | 0.972406  |

|    |   |   |           |           |           |
|----|---|---|-----------|-----------|-----------|
| 37 | 1 | 0 | -1.816021 | 0.044990  | -0.822234 |
| 38 | 1 | 0 | -6.142009 | -3.254948 | 0.194786  |
| 39 | 1 | 0 | -7.726169 | -1.519505 | 0.282208  |
| 40 | 1 | 0 | -8.257672 | 0.625157  | 1.280678  |
| 41 | 1 | 0 | -7.812482 | 3.057591  | 1.488133  |
| 42 | 1 | 0 | -5.735528 | 4.032463  | 0.586266  |
| 43 | 1 | 0 | 0.355885  | -2.702668 | 0.492256  |
| 44 | 1 | 0 | 2.759687  | -0.038164 | -1.896994 |
| 45 | 1 | 0 | 6.074604  | -1.715965 | 0.278765  |
| 46 | 1 | 0 | 4.489367  | -2.716775 | 1.899963  |
| 47 | 1 | 0 | 2.067018  | -2.344409 | 1.676709  |
| 48 | 1 | 0 | 4.985533  | 1.723765  | 0.105644  |
| 49 | 1 | 0 | 5.931577  | 2.748383  | 2.150908  |
| 50 | 1 | 0 | 8.330035  | 2.424995  | 2.719081  |
| 51 | 1 | 0 | 9.797486  | 1.111893  | 1.197398  |
| 52 | 1 | 0 | 8.858813  | 0.146808  | -0.900553 |
| 53 | 1 | 0 | -2.514715 | 4.082444  | -1.061297 |
| 54 | 1 | 0 | -4.224838 | 4.595669  | -1.086127 |
| 55 | 1 | 0 | -3.411375 | 4.261839  | 0.472916  |

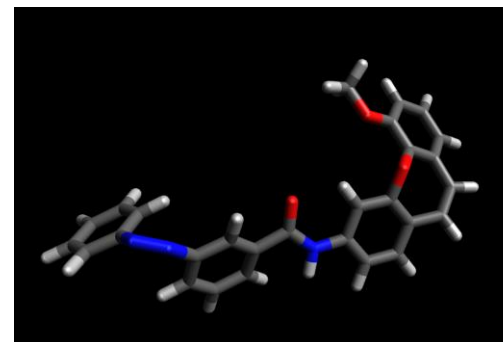

Visualization of calculated geometry of (**5aZ**):

- The calculated coordinates of (**5bE**) ( the part of calculated log file) -

Standard orientation:

| Center<br>Number | Atomic<br>Number | Atomic<br>Type | Coordinates (Angstroms) |           |           |
|------------------|------------------|----------------|-------------------------|-----------|-----------|
|                  |                  |                | X                       | Y         | Z         |
| 1                | 6                | 0              | -2.060029               | -1.956618 | -0.434540 |
| 2                | 6                | 0              | -2.878276               | -3.059052 | -0.736146 |
| 3                | 6                | 0              | -4.203344               | -2.868894 | -1.100068 |
| 4                | 6                | 0              | -4.776927               | -1.586240 | -1.174859 |
| 5                | 6                | 0              | -3.927222               | -0.501445 | -0.889395 |
| 6                | 6                | 0              | -2.598176               | -0.663118 | -0.514433 |
| 7                | 6                | 0              | -6.184165               | -1.425473 | -1.532499 |

|    |   |   |           |           |           |
|----|---|---|-----------|-----------|-----------|
| 8  | 6 | 0 | -7.006089 | -0.408329 | -1.192144 |
| 9  | 6 | 0 | -6.680893 | 0.755065  | -0.364098 |
| 10 | 6 | 0 | -5.377883 | 1.262420  | -0.267362 |
| 11 | 8 | 0 | -4.366025 | 0.800314  | -1.099733 |
| 12 | 6 | 0 | -7.695654 | 1.377241  | 0.391501  |
| 13 | 6 | 0 | -7.400562 | 2.445878  | 1.227292  |
| 14 | 6 | 0 | -6.092684 | 2.929718  | 1.336405  |
| 15 | 6 | 0 | -5.068237 | 2.337452  | 0.588493  |
| 16 | 7 | 0 | -0.728086 | -2.222861 | -0.062540 |
| 17 | 6 | 0 | 0.285689  | -1.332557 | 0.212682  |
| 18 | 8 | 0 | 0.165109  | -0.113245 | 0.119738  |
| 19 | 6 | 0 | 1.588598  | -1.958183 | 0.632497  |
| 20 | 6 | 0 | 2.751220  | -1.224437 | 0.392216  |
| 21 | 6 | 0 | 3.999770  | -1.739113 | 0.767581  |
| 22 | 6 | 0 | 4.077344  | -2.986560 | 1.403101  |
| 23 | 6 | 0 | 2.916520  | -3.711740 | 1.663587  |
| 24 | 6 | 0 | 1.675523  | -3.203413 | 1.281076  |
| 25 | 7 | 0 | 5.241556  | -1.081420 | 0.561307  |
| 26 | 7 | 0 | 5.157131  | 0.033774  | -0.022070 |
| 27 | 6 | 0 | 6.389998  | 0.697182  | -0.226059 |
| 28 | 6 | 0 | 6.305185  | 1.940842  | -0.869851 |
| 29 | 6 | 0 | 7.452318  | 2.688229  | -1.123716 |
| 30 | 6 | 0 | 8.677992  | 2.168280  | -0.723034 |
| 31 | 6 | 0 | 8.795664  | 0.934043  | -0.081450 |
| 32 | 6 | 0 | 7.646008  | 0.197283  | 0.167209  |
| 33 | 9 | 0 | 9.797463  | 2.880634  | -0.961244 |
| 34 | 8 | 0 | -3.765613 | 2.733748  | 0.600663  |
| 35 | 6 | 0 | -3.404554 | 3.808744  | 1.460399  |
| 36 | 1 | 0 | -2.470709 | -4.066284 | -0.686105 |
| 37 | 1 | 0 | -4.820972 | -3.734172 | -1.327469 |
| 38 | 1 | 0 | -1.993280 | 0.207839  | -0.311704 |
| 39 | 1 | 0 | -6.624141 | -2.265527 | -2.067774 |
| 40 | 1 | 0 | -8.053521 | -0.494671 | -1.475499 |
| 41 | 1 | 0 | -8.712190 | 0.999860  | 0.320052  |
| 42 | 1 | 0 | -8.189978 | 2.916919  | 1.806417  |
| 43 | 1 | 0 | -5.883516 | 3.768136  | 1.990725  |
| 44 | 1 | 0 | -0.471910 | -3.201649 | -0.083229 |
| 45 | 1 | 0 | 2.688523  | -0.254306 | -0.085340 |
| 46 | 1 | 0 | 5.054931  | -3.362733 | 1.689840  |
| 47 | 1 | 0 | 2.975080  | -4.669366 | 2.172400  |
| 48 | 1 | 0 | 0.778290  | -3.766537 | 1.524560  |
| 49 | 1 | 0 | 5.326150  | 2.306517  | -1.164248 |
| 50 | 1 | 0 | 7.409357  | 3.652416  | -1.619805 |
| 51 | 1 | 0 | 9.777614  | 0.574397  | 0.210169  |
| 52 | 1 | 0 | 7.698607  | -0.765081 | 0.663882  |

|    |   |   |           |          |          |
|----|---|---|-----------|----------|----------|
| 53 | 1 | 0 | -2.330841 | 3.948358 | 1.324635 |
| 54 | 1 | 0 | -3.928870 | 4.734025 | 1.189642 |
| 55 | 1 | 0 | -3.610568 | 3.569938 | 2.511516 |

---

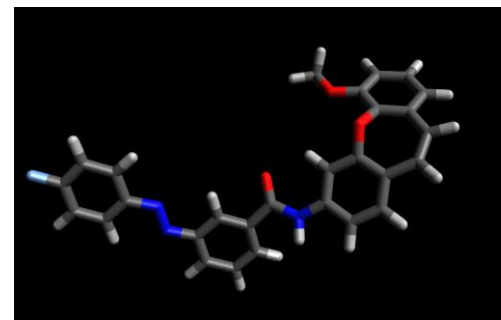

Visualization of calculated geometry of (**5bE**):

- The calculated coordinates of (**5bZ**) ( the part of calculated log file) -

| Standard orientation: |                  |                |                         |           |           |
|-----------------------|------------------|----------------|-------------------------|-----------|-----------|
| Center<br>Number      | Atomic<br>Number | Atomic<br>Type | Coordinates (Angstroms) |           |           |
|                       |                  |                | X                       | Y         | Z         |
| 1                     | 6                | 0              | -1.814962               | -1.938841 | 0.198801  |
| 2                     | 6                | 0              | -2.472338               | -3.018625 | 0.813061  |
| 3                     | 6                | 0              | -3.858048               | -3.058016 | 0.861942  |
| 4                     | 6                | 0              | -4.651138               | -2.033521 | 0.313312  |
| 5                     | 6                | 0              | -3.965477               | -0.976730 | -0.313874 |
| 6                     | 6                | 0              | -2.577760               | -0.907473 | -0.369891 |
| 7                     | 6                | 0              | -6.107500               | -2.097095 | 0.408565  |
| 8                     | 6                | 0              | -6.976084               | -1.062269 | 0.402900  |
| 9                     | 6                | 0              | -6.656328               | 0.364767  | 0.324149  |
| 10                    | 6                | 0              | -5.490723               | 0.837966  | -0.293929 |
| 11                    | 8                | 0              | -4.668555               | -0.011169 | -1.023642 |
| 12                    | 6                | 0              | -7.528327               | 1.304576  | 0.910713  |
| 13                    | 6                | 0              | -7.223236               | 2.658910  | 0.895289  |
| 14                    | 6                | 0              | -6.046821               | 3.120200  | 0.295790  |
| 15                    | 6                | 0              | -5.168838               | 2.209467  | -0.303700 |
| 16                    | 7                | 0              | -0.406616               | -1.958777 | 0.193696  |
| 17                    | 6                | 0              | 0.466081                | -1.086823 | -0.416419 |
| 18                    | 8                | 0              | 0.108423                | -0.138658 | -1.111651 |
| 19                    | 6                | 0              | 1.924288                | -1.377505 | -0.186445 |
| 20                    | 6                | 0              | 2.820149                | -0.936065 | -1.166462 |
| 21                    | 6                | 0              | 4.194118                | -1.130023 | -1.007623 |
| 22                    | 6                | 0              | 4.681412                | -1.817643 | 0.115148  |
| 23                    | 6                | 0              | 3.787995                | -2.267528 | 1.083872  |
| 24                    | 6                | 0              | 2.417198                | -2.040088 | 0.947404  |
| 25                    | 7                | 0              | 5.037105                | -0.788649 | -2.120429 |

|    |   |   |           |           |           |
|----|---|---|-----------|-----------|-----------|
| 26 | 7 | 0 | 6.114580  | -0.160461 | -2.015626 |
| 27 | 6 | 0 | 6.560367  | 0.480873  | -0.813970 |
| 28 | 6 | 0 | 5.740435  | 1.284305  | -0.004555 |
| 29 | 6 | 0 | 6.291151  | 1.987536  | 1.062804  |
| 30 | 6 | 0 | 7.653767  | 1.863077  | 1.318816  |
| 31 | 6 | 0 | 8.491846  | 1.088786  | 0.522624  |
| 32 | 6 | 0 | 7.940345  | 0.421821  | -0.567326 |
| 33 | 9 | 0 | 8.182209  | 2.532455  | 2.363415  |
| 34 | 8 | 0 | -4.007689 | 2.545272  | -0.930654 |
| 35 | 6 | 0 | -3.640613 | 3.919850  | -0.961468 |
| 36 | 1 | 0 | -1.892819 | -3.828633 | 1.250222  |
| 37 | 1 | 0 | -4.348497 | -3.900625 | 1.342913  |
| 38 | 1 | 0 | -2.108143 | -0.073205 | -0.868984 |
| 39 | 1 | 0 | -6.516376 | -3.091659 | 0.580032  |
| 40 | 1 | 0 | -8.027369 | -1.290236 | 0.569211  |
| 41 | 1 | 0 | -8.439524 | 0.951774  | 1.386189  |
| 42 | 1 | 0 | -7.901569 | 3.374335  | 1.351821  |
| 43 | 1 | 0 | -5.828543 | 4.181835  | 0.288901  |
| 44 | 1 | 0 | 0.004767  | -2.778410 | 0.621580  |
| 45 | 1 | 0 | 2.440645  | -0.434196 | -2.050327 |
| 46 | 1 | 0 | 5.745369  | -2.003960 | 0.220578  |
| 47 | 1 | 0 | 4.162712  | -2.791538 | 1.958412  |
| 48 | 1 | 0 | 1.748187  | -2.363884 | 1.740064  |
| 49 | 1 | 0 | 4.681955  | 1.379691  | -0.219268 |
| 50 | 1 | 0 | 5.680764  | 2.626317  | 1.693246  |
| 51 | 1 | 0 | 9.552544  | 1.034892  | 0.745687  |
| 52 | 1 | 0 | 8.569201  | -0.163232 | -1.231951 |
| 53 | 1 | 0 | -2.689736 | 3.960310  | -1.495344 |
| 54 | 1 | 0 | -4.384655 | 4.523095  | -1.497066 |
| 55 | 1 | 0 | -3.507482 | 4.323544  | 0.050283  |

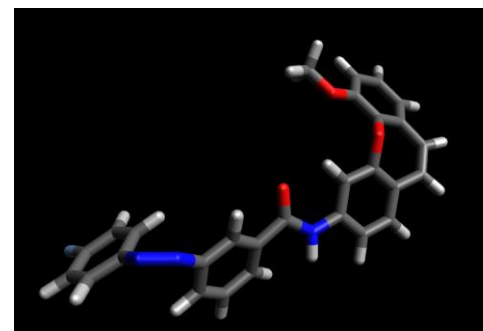

Visualization of calculated geometry of (**5bZ**):

- The calculated coordinates of (**5cE**) ( the part of calculated log file) -

Standard orientation:

-----  
Center      Atomic      Atomic      Coordinates (Angstroms)  
-----

| Number | Number | Type | X         | Y         | Z         |
|--------|--------|------|-----------|-----------|-----------|
| 1      | 6      | 0    | -2.438257 | -1.848761 | -0.372983 |
| 2      | 6      | 0    | -3.173319 | -3.034142 | -0.547009 |
| 3      | 6      | 0    | -4.523678 | -2.981040 | -0.860619 |
| 4      | 6      | 0    | -5.205129 | -1.758967 | -1.008481 |
| 5      | 6      | 0    | -4.437925 | -0.589943 | -0.850198 |
| 6      | 6      | 0    | -3.085507 | -0.613530 | -0.528666 |
| 7      | 6      | 0    | -6.634852 | -1.740891 | -1.308454 |
| 8      | 6      | 0    | -7.523711 | -0.768888 | -1.006300 |
| 9      | 6      | 0    | -7.261359 | 0.478966  | -0.286066 |
| 10     | 6      | 0    | -6.002563 | 1.095473  | -0.293684 |
| 11     | 8      | 0    | -4.993389 | 0.650847  | -1.138889 |
| 12     | 6      | 0    | -8.290833 | 1.075837  | 0.469950  |
| 13     | 6      | 0    | -8.050308 | 2.227999  | 1.206346  |
| 14     | 6      | 0    | -6.784144 | 2.822431  | 1.212780  |
| 15     | 6      | 0    | -5.747248 | 2.256875  | 0.461345  |
| 16     | 7      | 0    | -1.074527 | -1.975048 | -0.044153 |
| 17     | 6      | 0    | -0.125901 | -0.986423 | 0.091329  |
| 18     | 8      | 0    | -0.347590 | 0.204482  | -0.115446 |
| 19     | 6      | 0    | 1.238793  | -1.462463 | 0.506625  |
| 20     | 6      | 0    | 2.332063  | -0.671353 | 0.135446  |
| 21     | 6      | 0    | 3.631819  | -1.036313 | 0.495735  |
| 22     | 6      | 0    | 3.848180  | -2.200341 | 1.256128  |
| 23     | 6      | 0    | 2.762298  | -2.974928 | 1.644443  |
| 24     | 6      | 0    | 1.461576  | -2.613683 | 1.274426  |
| 25     | 7      | 0    | 4.654266  | -0.160354 | 0.047679  |
| 26     | 7      | 0    | 5.821751  | -0.506690 | 0.380016  |
| 27     | 6      | 0    | 6.840142  | 0.361650  | -0.062581 |
| 28     | 6      | 0    | 8.157672  | 0.020591  | 0.289568  |
| 29     | 6      | 0    | 9.250315  | 0.791699  | -0.084719 |
| 30     | 6      | 0    | 9.001657  | 1.934861  | -0.833853 |
| 31     | 6      | 0    | 7.714762  | 2.321897  | -1.212113 |
| 32     | 6      | 0    | 6.643996  | 1.530858  | -0.822553 |
| 33     | 9      | 0    | 8.379731  | -1.086899 | 1.013464  |
| 34     | 9      | 0    | 10.044894 | 2.696394  | -1.207724 |
| 35     | 8      | 0    | -4.483375 | 2.756685  | 0.377878  |
| 36     | 6      | 0    | -4.176736 | 3.921825  | 1.135127  |
| 37     | 1      | 0    | -2.681366 | -3.998048 | -0.437843 |
| 38     | 1      | 0    | -5.075554 | -3.908857 | -0.988885 |
| 39     | 1      | 0    | -2.548074 | 0.316992  | -0.424831 |
| 40     | 1      | 0    | -7.025218 | -2.653666 | -1.755938 |
| 41     | 1      | 0    | -8.571466 | -0.961049 | -1.230219 |
| 42     | 1      | 0    | -9.274284 | 0.613645  | 0.478195  |
| 43     | 1      | 0    | -8.850357 | 2.678729  | 1.787034  |

|    |   |   |           |           |           |
|----|---|---|-----------|-----------|-----------|
| 44 | 1 | 0 | -6.617846 | 3.724081  | 1.790832  |
| 45 | 1 | 0 | -0.740312 | -2.928563 | 0.014766  |
| 46 | 1 | 0 | 2.174021  | 0.235079  | -0.438785 |
| 47 | 1 | 0 | 4.861444  | -2.469195 | 1.533049  |
| 48 | 1 | 0 | 2.919476  | -3.865314 | 2.246691  |
| 49 | 1 | 0 | 0.629363  | -3.220461 | 1.621735  |
| 50 | 1 | 0 | 10.257352 | 0.508153  | 0.199447  |
| 51 | 1 | 0 | 7.575370  | 3.224467  | -1.797944 |
| 52 | 1 | 0 | 5.628939  | 1.796351  | -1.095975 |
| 53 | 1 | 0 | -3.125425 | 4.135980  | 0.935920  |
| 54 | 1 | 0 | -4.788022 | 4.777748  | 0.821937  |
| 55 | 1 | 0 | -4.316070 | 3.751213  | 2.210203  |

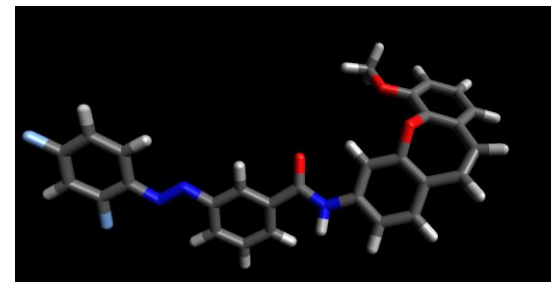

Visualization of calculated geometry of (**5cE**):

- The calculated coordinates of (**5cZ**) ( the part of calculated log file) -

Standard orientation:

| Center<br>Number | Atomic<br>Number | Atomic<br>Type | Coordinates (Angstroms) |           |           |
|------------------|------------------|----------------|-------------------------|-----------|-----------|
|                  |                  |                | X                       | Y         | Z         |
| 1                | 6                | 0              | 0.786076                | -0.343098 | -1.215296 |
| 2                | 6                | 0              | 0.987384                | -1.370603 | -2.152842 |
| 3                | 6                | 0              | 2.149985                | -2.127561 | -2.121639 |
| 4                | 6                | 0              | 3.160440                | -1.900699 | -1.168946 |
| 5                | 6                | 0              | 2.921237                | -0.878204 | -0.232194 |
| 6                | 6                | 0              | 1.770910                | -0.097559 | -0.246336 |
| 7                | 6                | 0              | 4.384267                | -2.698621 | -1.184505 |
| 8                | 6                | 0              | 5.604864                | -2.335487 | -0.732598 |
| 9                | 6                | 0              | 5.985632                | -1.049082 | -0.145220 |
| 10               | 6                | 0              | 5.066544                | -0.235058 | 0.531005  |
| 11               | 8                | 0              | 3.791390                | -0.695186 | 0.835510  |
| 12               | 6                | 0              | 7.310838                | -0.587203 | -0.280342 |
| 13               | 6                | 0              | 7.682038                | 0.653217  | 0.220815  |
| 14               | 6                | 0              | 6.751712                | 1.469841  | 0.872150  |
| 15               | 6                | 0              | 5.432083                | 1.030329  | 1.030179  |

|    |   |   |           |           |           |
|----|---|---|-----------|-----------|-----------|
| 16 | 7 | 0 | -0.431604 | 0.363229  | -1.278976 |
| 17 | 6 | 0 | -0.839268 | 1.440635  | -0.525563 |
| 18 | 8 | 0 | -0.127687 | 2.010683  | 0.297416  |
| 19 | 6 | 0 | -2.252210 | 1.892650  | -0.772756 |
| 20 | 6 | 0 | -3.276995 | 1.009591  | -1.129075 |
| 21 | 6 | 0 | -4.577757 | 1.495302  | -1.310677 |
| 22 | 6 | 0 | -4.850929 | 2.861463  | -1.187332 |
| 23 | 6 | 0 | -3.835446 | 3.730095  | -0.788507 |
| 24 | 6 | 0 | -2.545337 | 3.249398  | -0.572632 |
| 25 | 7 | 0 | -5.625737 | 0.643257  | -1.796974 |
| 26 | 7 | 0 | -5.935894 | -0.424338 | -1.230588 |
| 27 | 6 | 0 | -5.406458 | -0.784317 | 0.066678  |
| 28 | 6 | 0 | -4.601573 | -1.916354 | 0.195126  |
| 29 | 6 | 0 | -4.216510 | -2.421403 | 1.427145  |
| 30 | 6 | 0 | -4.693606 | -1.770805 | 2.561542  |
| 31 | 6 | 0 | -5.506091 | -0.645100 | 2.487584  |
| 32 | 6 | 0 | -5.861667 | -0.155428 | 1.230783  |
| 33 | 9 | 0 | -4.127352 | -2.488179 | -0.933840 |
| 34 | 9 | 0 | -4.342489 | -2.249521 | 3.770925  |
| 35 | 8 | 0 | 4.448732  | 1.729477  | 1.661372  |
| 36 | 6 | 0 | 4.770027  | 3.018387  | 2.171666  |
| 37 | 1 | 0 | 0.227607  | -1.577646 | -2.903020 |
| 38 | 1 | 0 | 2.288731  | -2.917078 | -2.855992 |
| 39 | 1 | 0 | 1.648323  | 0.678318  | 0.494389  |
| 40 | 1 | 0 | 4.304046  | -3.659413 | -1.690540 |
| 41 | 1 | 0 | 6.428127  | -3.026860 | -0.902928 |
| 42 | 1 | 0 | 8.036553  | -1.212146 | -0.793734 |
| 43 | 1 | 0 | 8.705447  | 1.000278  | 0.108934  |
| 44 | 1 | 0 | 7.061853  | 2.433047  | 1.260145  |
| 45 | 1 | 0 | -1.043544 | 0.089180  | -2.038195 |
| 46 | 1 | 0 | -3.086506 | -0.050273 | -1.265511 |
| 47 | 1 | 0 | -5.856663 | 3.223844  | -1.379849 |
| 48 | 1 | 0 | -4.050417 | 4.786564  | -0.657483 |
| 49 | 1 | 0 | -1.745954 | 3.915038  | -0.265044 |
| 50 | 1 | 0 | -3.566168 | -3.286095 | 1.499912  |
| 51 | 1 | 0 | -5.855085 | -0.168717 | 3.397523  |
| 52 | 1 | 0 | -6.510728 | 0.711050  | 1.148607  |
| 53 | 1 | 0 | 3.847346  | 3.400933  | 2.611051  |
| 54 | 1 | 0 | 5.546017  | 2.962881  | 2.945763  |
| 55 | 1 | 0 | 5.101622  | 3.695597  | 1.374310  |

Visualization of calculated geometry of (**5cZ**) :

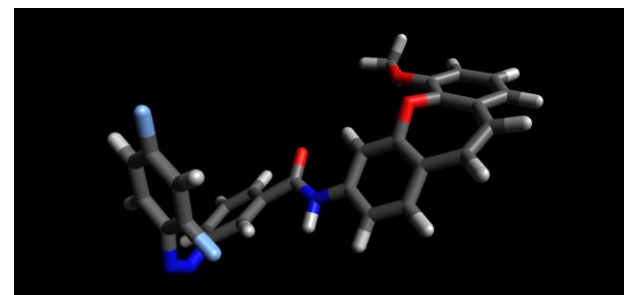

- The calculated coordinates of (**5dE**) ( the part of calculated log file) -

Standard orientation:

| Center<br>Number | Atomic<br>Number | Atomic<br>Type | Coordinates (Angstroms) |           |           |
|------------------|------------------|----------------|-------------------------|-----------|-----------|
|                  |                  |                | X                       | Y         | Z         |
| 1                | 6                | 0              | 1.583502                | -0.802477 | -0.191246 |
| 2                | 6                | 0              | 1.606251                | -2.132160 | -0.646508 |
| 3                | 6                | 0              | 2.772000                | -2.879953 | -0.567728 |
| 4                | 6                | 0              | 3.962486                | -2.347164 | -0.040032 |
| 5                | 6                | 0              | 3.902147                | -1.022315 | 0.430591  |
| 6                | 6                | 0              | 2.751232                | -0.246124 | 0.353078  |
| 7                | 6                | 0              | 5.180311                | -3.153191 | -0.001697 |
| 8                | 6                | 0              | 6.457301                | -2.711146 | -0.013881 |
| 9                | 6                | 0              | 6.913811                | -1.321935 | -0.093237 |
| 10               | 6                | 0              | 6.139808                | -0.253115 | 0.379237  |
| 11               | 8                | 0              | 4.982575                | -0.477804 | 1.114507  |
| 12               | 6                | 0              | 8.157954                | -1.030969 | -0.689297 |
| 13               | 6                | 0              | 8.586617                | 0.282474  | -0.825810 |
| 14               | 6                | 0              | 7.796312                | 1.344301  | -0.373564 |
| 15               | 6                | 0              | 6.562185                | 1.082689  | 0.233115  |
| 16               | 7                | 0              | 0.362298                | -0.107319 | -0.285644 |
| 17               | 6                | 0              | 0.086249                | 1.199555  | 0.047608  |
| 18               | 8                | 0              | 0.933422                | 1.995741  | 0.445879  |
| 19               | 6                | 0              | -1.349974               | 1.612196  | -0.119562 |
| 20               | 6                | 0              | -2.426492               | 0.725582  | -0.003682 |
| 21               | 6                | 0              | -3.743048               | 1.183776  | -0.137333 |
| 22               | 6                | 0              | -3.990239               | 2.543081  | -0.394076 |
| 23               | 6                | 0              | -2.920523               | 3.426090  | -0.498872 |
| 24               | 6                | 0              | -1.608423               | 2.969886  | -0.352783 |
| 25               | 7                | 0              | -4.743236               | 0.187335  | 0.018023  |
| 26               | 7                | 0              | -5.921235               | 0.625163  | -0.115949 |
| 27               | 6                | 0              | -6.961702               | -0.306401 | 0.025702  |
| 28               | 6                | 0              | -6.882536               | -1.694831 | 0.283900  |
| 29               | 6                | 0              | -8.011392               | -2.493719 | 0.396449  |
| 30               | 6                | 0              | -9.275752               | -1.919180 | 0.252676  |
| 31               | 6                | 0              | -9.412452               | -0.554617 | -0.003145 |
| 32               | 6                | 0              | -8.266011               | 0.217317  | -0.111412 |
| 33               | 9                | 0              | -5.686699               | -2.282087 | 0.426748  |

|    |   |   |            |           |           |
|----|---|---|------------|-----------|-----------|
| 34 | 9 | 0 | -8.398701  | 1.530020  | -0.357896 |
| 35 | 8 | 0 | 5.719790   | 2.031938  | 0.726416  |
| 36 | 6 | 0 | 6.101209   | 3.396157  | 0.590715  |
| 37 | 1 | 0 | 0.705151   | -2.578953 | -1.060614 |
| 38 | 1 | 0 | 2.770122   | -3.905490 | -0.928476 |
| 39 | 1 | 0 | 2.769009   | 0.768699  | 0.721179  |
| 40 | 1 | 0 | 5.023984   | -4.229890 | -0.047198 |
| 41 | 1 | 0 | 7.245713   | -3.459705 | -0.067622 |
| 42 | 1 | 0 | 8.772755   | -1.850188 | -1.052309 |
| 43 | 1 | 0 | 9.546263   | 0.495603  | -1.288512 |
| 44 | 1 | 0 | 8.150868   | 2.362402  | -0.485479 |
| 45 | 1 | 0 | -0.386436  | -0.624116 | -0.729298 |
| 46 | 1 | 0 | -2.286525  | -0.327009 | 0.225820  |
| 47 | 1 | 0 | -5.015538  | 2.880655  | -0.497243 |
| 48 | 1 | 0 | -3.105780  | 4.479197  | -0.691671 |
| 49 | 1 | 0 | -0.770316  | 3.655936  | -0.417230 |
| 50 | 1 | 0 | -7.884087  | -3.552856 | 0.594847  |
| 51 | 1 | 0 | -10.160862 | -2.541678 | 0.340946  |
| 52 | 1 | 0 | -10.383083 | -0.084612 | -0.119056 |
| 53 | 1 | 0 | 5.289894   | 3.975654  | 1.034250  |
| 54 | 1 | 0 | 7.035123   | 3.608076  | 1.126716  |
| 55 | 1 | 0 | 6.216277   | 3.678798  | -0.463398 |

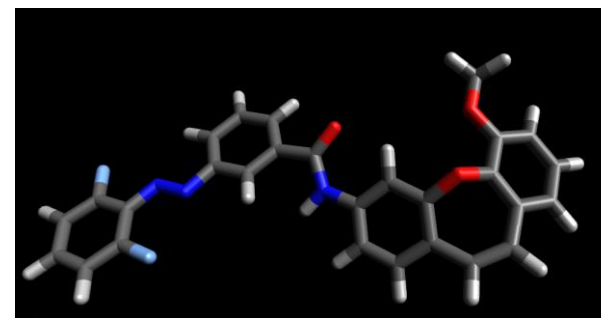

Visualization of calculated geometry of (**5dE**) :

- The calculated coordinates of (**5dZ**) ( the part of calculated log file) -  
Standard orientation:

| Center<br>Number | Atomic<br>Number | Atomic<br>Type | Coordinates (Angstroms) |           |           |
|------------------|------------------|----------------|-------------------------|-----------|-----------|
|                  |                  |                | X                       | Y         | Z         |
| 1                | 6                | 0              | -1.236362               | -2.159776 | 0.176027  |
| 2                | 6                | 0              | -1.821121               | -3.110252 | 1.030498  |
| 3                | 6                | 0              | -3.193825               | -3.120736 | 1.230471  |
| 4                | 6                | 0              | -4.043919               | -2.193976 | 0.599463  |
| 5                | 6                | 0              | -3.431576               | -1.268855 | -0.266267 |

|    |   |   |           |           |           |
|----|---|---|-----------|-----------|-----------|
| 6  | 6 | 0 | -2.057704 | -1.228426 | -0.476896 |
| 7  | 6 | 0 | -5.482543 | -2.219267 | 0.852737  |
| 8  | 6 | 0 | -6.349682 | -1.186677 | 0.763981  |
| 9  | 6 | 0 | -6.040821 | 0.202883  | 0.419689  |
| 10 | 6 | 0 | -4.945647 | 0.547198  | -0.384408 |
| 11 | 8 | 0 | -4.211477 | -0.426980 | -1.049680 |
| 12 | 6 | 0 | -6.843397 | 1.242013  | 0.933186  |
| 13 | 6 | 0 | -6.535817 | 2.569730  | 0.668051  |
| 14 | 6 | 0 | -5.425912 | 2.904959  | -0.114362 |
| 15 | 6 | 0 | -4.619097 | 1.892154  | -0.646355 |
| 16 | 7 | 0 | 0.161843  | -2.213338 | 0.011249  |
| 17 | 6 | 0 | 0.968165  | -1.428428 | -0.780193 |
| 18 | 8 | 0 | 0.559216  | -0.487560 | -1.455842 |
| 19 | 6 | 0 | 2.429519  | -1.788389 | -0.754935 |
| 20 | 6 | 0 | 3.336815  | -0.755323 | -1.015366 |
| 21 | 6 | 0 | 4.708559  | -1.020285 | -1.037361 |
| 22 | 6 | 0 | 5.179664  | -2.327767 | -0.854679 |
| 23 | 6 | 0 | 4.277441  | -3.351910 | -0.584640 |
| 24 | 6 | 0 | 2.906527  | -3.088426 | -0.534905 |
| 25 | 7 | 0 | 5.665809  | -0.029331 | -1.423958 |
| 26 | 7 | 0 | 5.706147  | 1.118531  | -0.930740 |
| 27 | 6 | 0 | 4.941761  | 1.499907  | 0.223694  |
| 28 | 6 | 0 | 4.273029  | 2.730843  | 0.206294  |
| 29 | 6 | 0 | 3.667321  | 3.271755  | 1.329760  |
| 30 | 6 | 0 | 3.768457  | 2.583105  | 2.541140  |
| 31 | 6 | 0 | 4.457119  | 1.371405  | 2.616630  |
| 32 | 6 | 0 | 5.031544  | 0.853654  | 1.464245  |
| 33 | 9 | 0 | 4.189407  | 3.377223  | -0.972236 |
| 34 | 9 | 0 | 5.726412  | -0.298783 | 1.536908  |
| 35 | 8 | 0 | -3.527520 | 2.098896  | -1.433474 |
| 36 | 6 | 0 | -3.145829 | 3.443023  | -1.702815 |
| 37 | 1 | 0 | -1.196270 | -3.844489 | 1.534001  |
| 38 | 1 | 0 | -3.627682 | -3.862360 | 1.896512  |
| 39 | 1 | 0 | -1.643958 | -0.490159 | -1.147351 |
| 40 | 1 | 0 | -5.869274 | -3.165662 | 1.227656  |
| 41 | 1 | 0 | -7.377600 | -1.368262 | 1.072613  |

|    |   |   |           |           |           |
|----|---|---|-----------|-----------|-----------|
| 42 | 1 | 0 | -7.700710 | 0.989239  | 1.551202  |
| 43 | 1 | 0 | -7.159902 | 3.362985  | 1.070157  |
| 44 | 1 | 0 | -5.205031 | 3.947204  | -0.313610 |
| 45 | 1 | 0 | 0.631534  | -2.885193 | 0.604666  |
| 46 | 1 | 0 | 2.953888  | 0.236412  | -1.226881 |
| 47 | 1 | 0 | 6.246281  | -2.521362 | -0.918376 |
| 48 | 1 | 0 | 4.637973  | -4.365371 | -0.435557 |
| 49 | 1 | 0 | 2.217685  | -3.913627 | -0.375361 |
| 50 | 1 | 0 | 3.136334  | 4.214188  | 1.247283  |
| 51 | 1 | 0 | 3.308551  | 2.995619  | 3.433595  |
| 52 | 1 | 0 | 4.561839  | 0.827965  | 3.549872  |
| 53 | 1 | 0 | -2.248525 | 3.377711  | -2.320299 |
| 54 | 1 | 0 | -3.928163 | 3.980911  | -2.253374 |
| 55 | 1 | 0 | -2.913712 | 3.987606  | -0.778789 |

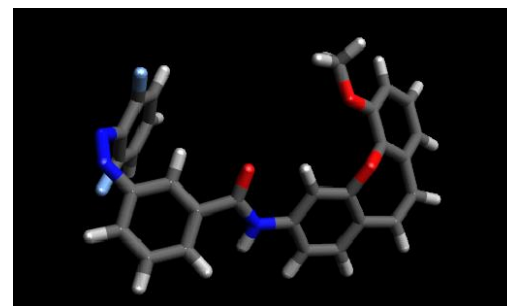

Visualization of calculated geometry of (**5dZ**) :

- The calculated coordinates of (**5eE**) ( the part of calculated log file) -

Standard orientation:

| Center<br>Number | Atomic<br>Number | Atomic<br>Type | Coordinates (Angstroms) |           |           |
|------------------|------------------|----------------|-------------------------|-----------|-----------|
|                  |                  |                | X                       | Y         | Z         |
| 1                | 6                | 0              | 1.417253                | -2.376617 | -0.165443 |
| 2                | 6                | 0              | 2.156665                | -3.387892 | -0.800760 |
| 3                | 6                | 0              | 3.542024                | -3.323528 | -0.833195 |
| 4                | 6                | 0              | 4.257298                | -2.262979 | -0.245966 |
| 5                | 6                | 0              | 3.490641                | -1.276694 | 0.402429  |
| 6                | 6                | 0              | 2.100786                | -1.312354 | 0.441535  |
| 7                | 6                | 0              | 5.714463                | -2.227505 | -0.338541 |
| 8                | 6                | 0              | 6.513435                | -1.139370 | -0.286701 |
| 9                | 6                | 0              | 6.111356                | 0.254430  | -0.118274 |
| 10               | 6                | 0              | 4.908142                | 0.648893  | 0.506184  |
| 11               | 8                | 0              | 4.093468                | -0.273003 | 1.154041  |

|    |   |   |           |           |           |
|----|---|---|-----------|-----------|-----------|
| 12 | 6 | 0 | 6.937926  | 1.285740  | -0.592498 |
| 13 | 6 | 0 | 6.599223  | 2.633945  | -0.487472 |
| 14 | 6 | 0 | 5.388396  | 2.987265  | 0.121461  |
| 15 | 6 | 0 | 4.545233  | 1.981486  | 0.619513  |
| 16 | 7 | 0 | 0.014838  | -2.506788 | -0.151564 |
| 17 | 6 | 0 | -0.926821 | -1.635098 | 0.346987  |
| 18 | 8 | 0 | -0.651325 | -0.542475 | 0.838250  |
| 19 | 6 | 0 | -2.352233 | -2.104555 | 0.239246  |
| 20 | 6 | 0 | -3.340888 | -1.122063 | 0.168052  |
| 21 | 6 | 0 | -4.691349 | -1.486500 | 0.079350  |
| 22 | 6 | 0 | -5.049334 | -2.842058 | 0.084713  |
| 23 | 6 | 0 | -4.065823 | -3.824800 | 0.176785  |
| 24 | 6 | 0 | -2.721434 | -3.461771 | 0.252657  |
| 25 | 7 | 0 | -5.772892 | -0.569256 | -0.009506 |
| 26 | 7 | 0 | -5.431725 | 0.644080  | -0.047817 |
| 27 | 6 | 0 | -6.504538 | 1.566852  | -0.130969 |
| 28 | 6 | 0 | -6.130002 | 2.917311  | -0.174919 |
| 29 | 6 | 0 | -7.102964 | 3.912397  | -0.257166 |
| 30 | 6 | 0 | -8.453751 | 3.560983  | -0.296028 |
| 31 | 6 | 0 | -8.830349 | 2.211422  | -0.252411 |
| 32 | 6 | 0 | -7.865754 | 1.214225  | -0.170204 |
| 33 | 8 | 0 | 4.944841  | 4.262964  | 0.292305  |
| 34 | 6 | 0 | 5.762192  | 5.329811  | -0.180045 |
| 35 | 1 | 0 | 1.642943  | -4.226211 | -1.265849 |
| 36 | 1 | 0 | 4.097431  | -4.113986 | -1.331733 |
| 37 | 1 | 0 | 1.561011  | -0.531196 | 0.955332  |
| 38 | 1 | 0 | 6.185984  | -3.184631 | -0.554686 |
| 39 | 1 | 0 | 7.576605  | -1.292970 | -0.464278 |
| 40 | 1 | 0 | 7.879135  | 1.017919  | -1.066821 |
| 41 | 1 | 0 | 7.277237  | 3.386177  | -0.873058 |
| 42 | 1 | 0 | 3.621542  | 2.250503  | 1.120499  |
| 43 | 1 | 0 | -0.339750 | -3.313417 | -0.649552 |
| 44 | 1 | 0 | -3.064757 | -0.074793 | 0.181048  |
| 45 | 1 | 0 | -6.102291 | -3.100607 | 0.022281  |
| 46 | 1 | 0 | -4.344645 | -4.874176 | 0.198458  |
| 47 | 1 | 0 | -1.970024 | -4.239884 | 0.359234  |
| 48 | 1 | 0 | -5.072074 | 3.161375  | -0.143088 |
| 49 | 1 | 0 | -6.808568 | 4.957624  | -0.290817 |
| 50 | 1 | 0 | -9.215177 | 4.333724  | -0.359992 |
| 51 | 1 | 0 | -9.882950 | 1.942423  | -0.282905 |
| 52 | 1 | 0 | -8.139747 | 0.165488  | -0.135393 |
| 53 | 1 | 0 | 5.221646  | 6.247013  | 0.059223  |
| 54 | 1 | 0 | 6.737293  | 5.339535  | 0.322583  |
| 55 | 1 | 0 | 5.912969  | 5.268071  | -1.264962 |

---

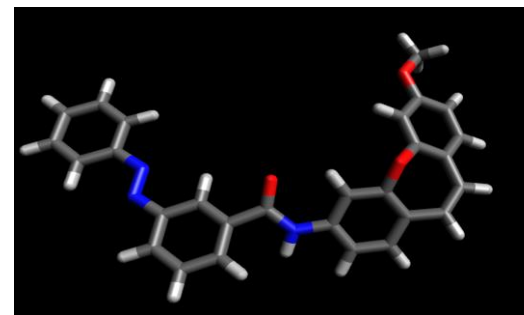

Visualization of calculated geometry of ((**5eE**) :

- The calculated coordinates of (**5eZ**) ( the part of calculated log file) -

Standard orientation:

| Center<br>Number | Atomic<br>Number | Atomic<br>Type | Coordinates (Angstroms) |           |           |
|------------------|------------------|----------------|-------------------------|-----------|-----------|
|                  |                  |                | X                       | Y         | Z         |
| 1                | 6                | 0              | 1.179330                | -2.076518 | -0.158693 |
| 2                | 6                | 0              | 1.754735                | -3.209391 | -0.757565 |
| 3                | 6                | 0              | 3.132650                | -3.369557 | -0.767276 |
| 4                | 6                | 0              | 4.001862                | -2.421592 | -0.195024 |
| 5                | 6                | 0              | 3.395525                | -1.307265 | 0.414219  |
| 6                | 6                | 0              | 2.017517                | -1.119968 | 0.433156  |
| 7                | 6                | 0              | 5.446761                | -2.624163 | -0.261704 |
| 8                | 6                | 0              | 6.409990                | -1.677623 | -0.222864 |
| 9                | 6                | 0              | 6.235278                | -0.233213 | -0.097588 |
| 10               | 6                | 0              | 5.102632                | 0.367390  | 0.493386  |
| 11               | 8                | 0              | 4.140975                | -0.392078 | 1.150140  |
| 12               | 6                | 0              | 7.223565                | 0.637953  | -0.583423 |
| 13               | 6                | 0              | 7.104425                | 2.025470  | -0.520753 |
| 14               | 6                | 0              | 5.956962                | 2.586407  | 0.054183  |
| 15               | 6                | 0              | 4.956150                | 1.743657  | 0.563336  |
| 16               | 7                | 0              | -0.225223               | -1.970607 | -0.184540 |
| 17               | 6                | 0              | -1.027096               | -0.993649 | 0.359305  |
| 18               | 8                | 0              | -0.600287               | -0.050390 | 1.022397  |
| 19               | 6                | 0              | -2.500456               | -1.162360 | 0.109120  |
| 20               | 6                | 0              | -3.371277               | -0.603104 | 1.050027  |
| 21               | 6                | 0              | -4.754109               | -0.676220 | 0.867284  |
| 22               | 6                | 0              | -5.280674               | -1.361606 | -0.238791 |
| 23               | 6                | 0              | -4.413247               | -1.931541 | -1.167223 |
| 24               | 6                | 0              | -3.030206               | -1.823807 | -1.008545 |
| 25               | 7                | 0              | -5.573294               | -0.208412 | 1.951858  |
| 26               | 7                | 0              | -6.607646               | 0.478492  | 1.800861  |
| 27               | 6                | 0              | -7.002067               | 1.076356  | 0.557077  |

|    |   |   |           |           |           |
|----|---|---|-----------|-----------|-----------|
| 28 | 6 | 0 | -6.126044 | 1.828651  | -0.241028 |
| 29 | 6 | 0 | -6.621476 | 2.505543  | -1.353628 |
| 30 | 6 | 0 | -7.976249 | 2.422170  | -1.687886 |
| 31 | 6 | 0 | -8.848062 | 1.682840  | -0.883796 |
| 32 | 6 | 0 | -8.369952 | 1.036516  | 0.254300  |
| 33 | 8 | 0 | 5.722099  | 3.921482  | 0.180692  |
| 34 | 6 | 0 | 6.710625  | 4.827833  | -0.299804 |
| 35 | 1 | 0 | 1.119073  | -3.964574 | -1.214408 |
| 36 | 1 | 0 | 3.559770  | -4.252925 | -1.235322 |
| 37 | 1 | 0 | 1.605742  | -0.253832 | 0.928730  |
| 38 | 1 | 0 | 5.760491  | -3.650427 | -0.444842 |
| 39 | 1 | 0 | 7.436918  | -2.004983 | -0.377027 |
| 40 | 1 | 0 | 8.116453  | 0.209257  | -1.032368 |
| 41 | 1 | 0 | 7.900445  | 2.647465  | -0.912728 |
| 42 | 1 | 0 | 4.079671  | 2.171003  | 1.038535  |
| 43 | 1 | 0 | -0.701102 | -2.763770 | -0.595241 |
| 44 | 1 | 0 | -2.966539 | -0.102571 | 1.923456  |
| 45 | 1 | 0 | -6.354541 | -1.454420 | -0.363260 |
| 46 | 1 | 0 | -4.817232 | -2.454661 | -2.029221 |
| 47 | 1 | 0 | -2.378167 | -2.240751 | -1.771421 |
| 48 | 1 | 0 | -5.075669 | 1.901463  | 0.020701  |
| 49 | 1 | 0 | -5.945643 | 3.099282  | -1.963146 |
| 50 | 1 | 0 | -8.353247 | 2.943831  | -2.563212 |
| 51 | 1 | 0 | -9.904817 | 1.628248  | -1.130422 |
| 52 | 1 | 0 | -9.039626 | 0.487206  | 0.910205  |
| 53 | 1 | 0 | 6.320795  | 5.826924  | -0.098492 |
| 54 | 1 | 0 | 7.664101  | 4.695495  | 0.226223  |
| 55 | 1 | 0 | 6.871413  | 4.709075  | -1.378648 |

---

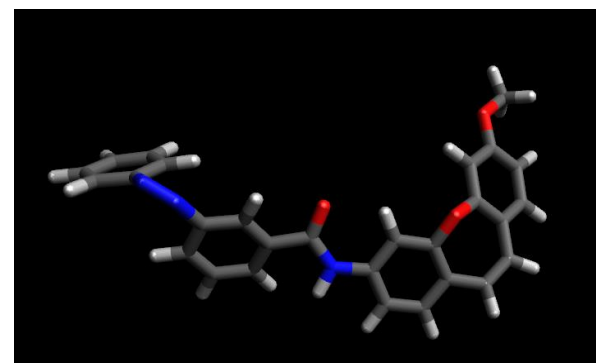

Visualization of calculated geometry of (**5eZ**) :

- The calculated coordinates of (**5fE**) ( the part of calculated log file) -

Standard orientation:

---

| Center | Atomic | Atomic | Coordinates (Angstroms) |
|--------|--------|--------|-------------------------|
|--------|--------|--------|-------------------------|

| Number | Number | Type | X         | Y         | Z         |
|--------|--------|------|-----------|-----------|-----------|
| 1      | 6      | 0    | -1.738954 | -2.179846 | -0.330990 |
| 2      | 6      | 0    | -2.492453 | -3.340949 | -0.569983 |
| 3      | 6      | 0    | -3.813018 | -3.242478 | -0.983194 |
| 4      | 6      | 0    | -4.449336 | -2.001255 | -1.172194 |
| 5      | 6      | 0    | -3.663986 | -0.855978 | -0.942316 |
| 6      | 6      | 0    | -2.340062 | -0.926706 | -0.521809 |
| 7      | 6      | 0    | -5.851020 | -1.956179 | -1.580140 |
| 8      | 6      | 0    | -6.737836 | -0.961122 | -1.360056 |
| 9      | 6      | 0    | -6.504158 | 0.304112  | -0.669303 |
| 10     | 6      | 0    | -5.233817 | 0.910076  | -0.559483 |
| 11     | 8      | 0    | -4.134300 | 0.416045  | -1.252635 |
| 12     | 6      | 0    | -7.575295 | 0.981776  | -0.065075 |
| 13     | 6      | 0    | -7.414905 | 2.177372  | 0.633579  |
| 14     | 6      | 0    | -6.136331 | 2.739412  | 0.738882  |
| 15     | 6      | 0    | -5.045684 | 2.095118  | 0.133829  |
| 16     | 7      | 0    | -0.404662 | -2.345182 | 0.089117  |
| 17     | 6      | 0    | 0.549005  | -1.382648 | 0.331995  |
| 18     | 8      | 0    | 0.360658  | -0.179132 | 0.166766  |
| 19     | 6      | 0    | 1.876935  | -1.906155 | 0.807917  |
| 20     | 6      | 0    | 3.002699  | -1.131834 | 0.523824  |
| 21     | 6      | 0    | 4.272032  | -1.553732 | 0.942675  |
| 22     | 6      | 0    | 4.406229  | -2.746278 | 1.667682  |
| 23     | 6      | 0    | 3.281217  | -3.510068 | 1.971959  |
| 24     | 6      | 0    | 2.019983  | -3.095966 | 1.544478  |
| 25     | 7      | 0    | 5.480748  | -0.850366 | 0.693843  |
| 26     | 7      | 0    | 5.344730  | 0.207700  | 0.020782  |
| 27     | 6      | 0    | 6.542845  | 0.916710  | -0.230320 |
| 28     | 6      | 0    | 6.398706  | 2.095410  | -0.977426 |
| 29     | 6      | 0    | 7.507312  | 2.878089  | -1.289274 |
| 30     | 6      | 0    | 8.754974  | 2.459135  | -0.840957 |
| 31     | 6      | 0    | 8.931382  | 1.291822  | -0.095968 |
| 32     | 6      | 0    | 7.819696  | 0.518970  | 0.209708  |
| 33     | 9      | 0    | 9.837788  | 3.206417  | -1.134900 |
| 34     | 8      | 0    | -5.846799 | 3.901508  | 1.386184  |
| 35     | 6      | 0    | -6.915682 | 4.613739  | 2.002512  |
| 36     | 1      | 0    | -2.039400 | -4.320440 | -0.434626 |
| 37     | 1      | 0    | -4.380798 | -4.151968 | -1.163038 |
| 38     | 1      | 0    | -1.776560 | -0.017304 | -0.376915 |
| 39     | 1      | 0    | -6.226292 | -2.868240 | -2.041023 |
| 40     | 1      | 0    | -7.769718 | -1.138280 | -1.658863 |
| 41     | 1      | 0    | -8.570355 | 0.549982  | -0.141950 |
| 42     | 1      | 0    | -8.279327 | 2.654707  | 1.079753  |
| 43     | 1      | 0    | -4.058353 | 2.541434  | 0.184741  |

|    |   |   |           |           |           |
|----|---|---|-----------|-----------|-----------|
| 44 | 1 | 0 | -0.092767 | -3.306853 | 0.135775  |
| 45 | 1 | 0 | 2.896019  | -0.203160 | -0.023296 |
| 46 | 1 | 0 | 5.398718  | -3.050375 | 1.986947  |
| 47 | 1 | 0 | 3.383411  | -4.424307 | 2.549090  |
| 48 | 1 | 0 | 1.149586  | -3.686241 | 1.819524  |
| 49 | 1 | 0 | 5.404504  | 2.382380  | -1.306230 |
| 50 | 1 | 0 | 7.418312  | 3.793110  | -1.865808 |
| 51 | 1 | 0 | 9.928226  | 1.010653  | 0.229431  |
| 52 | 1 | 0 | 7.918034  | -0.393979 | 0.786367  |
| 53 | 1 | 0 | -6.462649 | 5.497760  | 2.454123  |
| 54 | 1 | 0 | -7.666384 | 4.924705  | 1.265415  |
| 55 | 1 | 0 | -7.399345 | 4.012940  | 2.782658  |

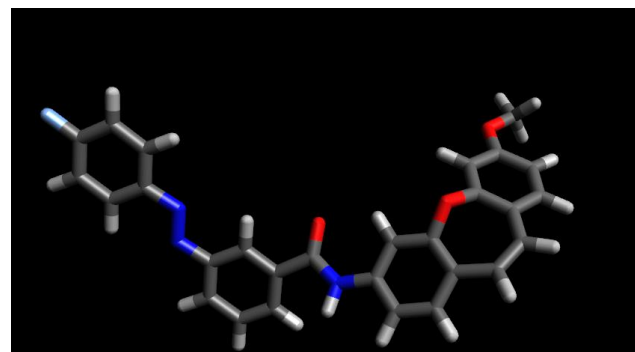

Visualization of calculated geometry of (**5fE**) :

- The calculated coordinates of (**5fZ**) ( the part of calculated log file) -

Standard orientation:

| Center<br>Number | Atomic<br>Number | Atomic<br>Type | Coordinates (Angstroms) |           |           |
|------------------|------------------|----------------|-------------------------|-----------|-----------|
|                  |                  |                | X                       | Y         | Z         |
| 1                | 6                | 0              | 1.521284                | -2.156806 | -0.250756 |
| 2                | 6                | 0              | 2.127713                | -3.207458 | -0.958784 |
| 3                | 6                | 0              | 3.510443                | -3.296776 | -1.025206 |
| 4                | 6                | 0              | 4.353119                | -2.355627 | -0.404500 |
| 5                | 6                | 0              | 3.716846                | -1.327395 | 0.316049  |
| 6                | 6                | 0              | 2.333043                | -1.211202 | 0.393350  |
| 7                | 6                | 0              | 5.802750                | -2.476350 | -0.536279 |
| 8                | 6                | 0              | 6.718319                | -1.486405 | -0.452637 |
| 9                | 6                | 0              | 6.476938                | -0.067962 | -0.202483 |
| 10               | 6                | 0              | 5.341174                | 0.421103  | 0.478302  |
| 11               | 8                | 0              | 4.445946                | -0.440658 | 1.102092  |
| 12               | 6                | 0              | 7.400088                | 0.891228  | -0.649451 |
| 13               | 6                | 0              | 7.215401                | 2.260594  | -0.464992 |
| 14               | 6                | 0              | 6.067049                | 2.710435  | 0.199168  |
| 15               | 6                | 0              | 5.130699                | 1.777183  | 0.671113  |
| 16               | 7                | 0              | 0.113538                | -2.114827 | -0.228208 |
| 17               | 6                | 0              | -0.710990               | -1.222558 | 0.416935  |
| 18               | 8                | 0              | -0.302759               | -0.322767 | 1.148871  |
| 19               | 6                | 0              | -2.182939               | -1.422848 | 0.179416  |
| 20               | 6                | 0              | -3.053014               | -0.961802 | 1.173399  |

|    |   |   |           |           |           |
|----|---|---|-----------|-----------|-----------|
| 21 | 6 | 0 | -4.435684 | -1.066070 | 1.006755  |
| 22 | 6 | 0 | -4.960975 | -1.686178 | -0.137811 |
| 23 | 6 | 0 | -4.093712 | -2.157402 | -1.120162 |
| 24 | 6 | 0 | -2.712224 | -2.016022 | -0.976229 |
| 25 | 7 | 0 | -5.258360 | -0.704641 | 2.128416  |
| 26 | 7 | 0 | -6.287486 | 0.002197  | 2.040796  |
| 27 | 6 | 0 | -6.677980 | 0.710799  | 0.857064  |
| 28 | 6 | 0 | -5.796132 | 1.486603  | 0.086722  |
| 29 | 6 | 0 | -6.285343 | 2.260703  | -0.961618 |
| 30 | 6 | 0 | -7.649381 | 2.233848  | -1.237830 |
| 31 | 6 | 0 | -8.546669 | 1.488225  | -0.479703 |
| 32 | 6 | 0 | -8.055007 | 0.749259  | 0.592419  |
| 33 | 9 | 0 | -8.119353 | 2.972375  | -2.263803 |
| 34 | 8 | 0 | 5.772626  | 4.015625  | 0.449913  |
| 35 | 6 | 0 | 6.695371  | 5.010458  | 0.016195  |
| 36 | 1 | 0 | 1.512720  | -3.954142 | -1.456001 |
| 37 | 1 | 0 | 3.962198  | -4.115391 | -1.579839 |
| 38 | 1 | 0 | 1.894030  | -0.412890 | 0.972730  |
| 39 | 1 | 0 | 6.159955  | -3.466574 | -0.813649 |
| 40 | 1 | 0 | 7.753594  | -1.745669 | -0.668135 |
| 41 | 1 | 0 | 8.293392  | 0.548356  | -1.166143 |
| 42 | 1 | 0 | 7.962185  | 2.954130  | -0.832938 |
| 43 | 1 | 0 | 4.254833  | 2.117333  | 1.213070  |
| 44 | 1 | 0 | -0.339955 | -2.889864 | -0.694801 |
| 45 | 1 | 0 | -2.646663 | -0.511811 | 2.073139  |
| 46 | 1 | 0 | -6.033908 | -1.804279 | -0.250358 |
| 47 | 1 | 0 | -4.497140 | -2.628469 | -2.011862 |
| 48 | 1 | 0 | -2.062426 | -2.351101 | -1.780094 |
| 49 | 1 | 0 | -4.736754 | 1.504646  | 0.317256  |
| 50 | 1 | 0 | -5.626145 | 2.879670  | -1.561962 |
| 51 | 1 | 0 | -9.605293 | 1.510479  | -0.717552 |
| 52 | 1 | 0 | -8.729937 | 0.183323  | 1.227773  |
| 53 | 1 | 0 | 6.265031  | 5.966798  | 0.317765  |
| 54 | 1 | 0 | 7.674324  | 4.883912  | 0.494914  |
| 55 | 1 | 0 | 6.818681  | 4.994008  | -1.073795 |

---

Visualization of calculated geometry of (**5fZ**) :

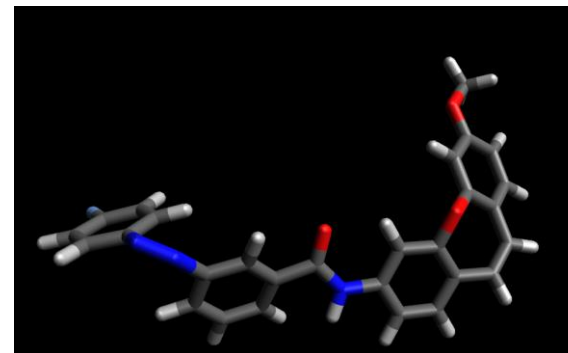

- The calculated coordinates of (**5gE**) ( the part of calculated log file) -

Standard orientation:

| Center<br>Number | Atomic<br>Number | Atomic<br>Type | Coordinates (Angstroms) |           |           |
|------------------|------------------|----------------|-------------------------|-----------|-----------|
|                  |                  |                | X                       | Y         | Z         |
| 1                | 6                | 0              | -2.167582               | -2.070498 | -0.255840 |
| 2                | 6                | 0              | -2.862413               | -3.290628 | -0.296565 |
| 3                | 6                | 0              | -4.211843               | -3.314761 | -0.617037 |
| 4                | 6                | 0              | -4.935086               | -2.141924 | -0.904381 |
| 5                | 6                | 0              | -4.207642               | -0.937346 | -0.875999 |
| 6                | 6                | 0              | -2.856064               | -0.884528 | -0.551697 |
| 7                | 6                | 0              | -6.362507               | -2.220713 | -1.203662 |
| 8                | 6                | 0              | -7.290390               | -1.253607 | -1.033565 |
| 9                | 6                | 0              | -7.084955               | 0.097132  | -0.517672 |
| 10               | 6                | 0              | -5.849748               | 0.777363  | -0.584782 |
| 11               | 8                | 0              | -4.777049               | 0.258518  | -1.301630 |
| 12               | 6                | 0              | -8.147180               | 0.786545  | 0.089093  |
| 13               | 6                | 0              | -8.008281               | 2.064961  | 0.627494  |
| 14               | 6                | 0              | -6.762498               | 2.701571  | 0.559937  |
| 15               | 6                | 0              | -5.683158               | 2.046315  | -0.053505 |
| 16               | 7                | 0              | -0.800762               | -2.112306 | 0.081860  |
| 17               | 6                | 0              | 0.102273                | -1.076676 | 0.156531  |
| 18               | 8                | 0              | -0.170098               | 0.087975  | -0.128224 |
| 19               | 6                | 0              | 1.484116                | -1.464530 | 0.605396  |
| 20               | 6                | 0              | 2.542977                | -0.645961 | 0.195828  |
| 21               | 6                | 0              | 3.855922                | -0.933393 | 0.577929  |
| 22               | 6                | 0              | 4.119989                | -2.044072 | 1.400475  |
| 23               | 6                | 0              | 3.067621                | -2.843896 | 1.827764  |
| 24               | 6                | 0              | 1.754228                | -2.561324 | 1.435393  |
| 25               | 7                | 0              | 4.841444                | -0.038263 | 0.086556  |
| 26               | 7                | 0              | 6.023229                | -0.328751 | 0.421815  |
| 27               | 6                | 0              | 7.006248                | 0.559487  | -0.059066 |
| 28               | 6                | 0              | 8.338695                | 0.270649  | 0.283683  |
| 29               | 6                | 0              | 9.400610                | 1.066563  | -0.125234 |
| 30               | 6                | 0              | 9.104908                | 2.181440  | -0.899534 |
| 31               | 6                | 0              | 7.801218                | 2.516769  | -1.269673 |
| 32               | 6                | 0              | 6.761971                | 1.701737  | -0.845698 |
| 33               | 9                | 0              | 8.606158                | -0.810136 | 1.032133  |
| 34               | 9                | 0              | 10.117676               | 2.966656  | -1.306635 |
| 35               | 8                | 0              | -6.496597               | 3.947116  | 1.040652  |
| 36               | 6                | 0              | -7.555031               | 4.669689  | 1.662824  |
| 37               | 1                | 0              | -2.341622               | -4.220232 | -0.078374 |
| 38               | 1                | 0              | -4.733287               | -4.268335 | -0.642136 |
| 39               | 1                | 0              | -2.341503               | 0.064529  | -0.560586 |

|    |   |   |           |           |           |
|----|---|---|-----------|-----------|-----------|
| 40 | 1 | 0 | -6.713497 | -3.200781 | -1.522053 |
| 41 | 1 | 0 | -8.328442 | -1.519506 | -1.226506 |
| 42 | 1 | 0 | -9.116620 | 0.297109  | 0.145659  |
| 43 | 1 | 0 | -8.864167 | 2.547363  | 1.084598  |
| 44 | 1 | 0 | -4.724320 | 2.546673  | -0.136492 |
| 45 | 1 | 0 | -0.427613 | -3.043506 | 0.215036  |
| 46 | 1 | 0 | 2.347835  | 0.220296  | -0.426954 |
| 47 | 1 | 0 | 5.142873  | -2.252230 | 1.693742  |
| 48 | 1 | 0 | 3.260937  | -3.692333 | 2.478110  |
| 49 | 1 | 0 | 0.948709  | -3.185319 | 1.813873  |
| 50 | 1 | 0 | 10.419997 | 0.823140  | 0.151986  |
| 51 | 1 | 0 | 7.624865  | 3.399325  | -1.875697 |
| 52 | 1 | 0 | 5.735271  | 1.927444  | -1.111328 |
| 53 | 1 | 0 | -7.123914 | 5.624468  | 1.968177  |
| 54 | 1 | 0 | -8.381568 | 4.849581  | 0.964230  |
| 55 | 1 | 0 | -7.934251 | 4.141817  | 2.546610  |

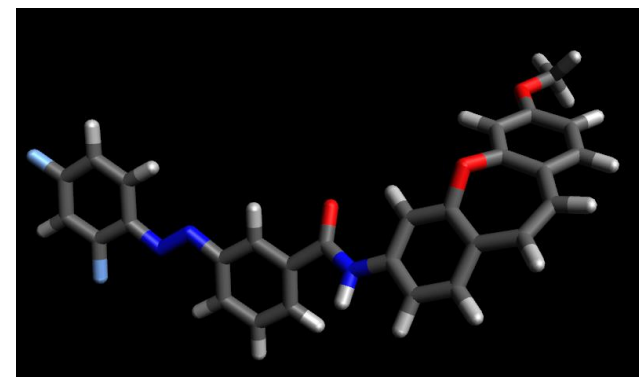

Visualization of calculated geometry of (**5gE**) :

- The calculated coordinates of (**5gZ**) ( the part of calculated log file) -

Standard orientation:

| Center<br>Number | Atomic<br>Number | Atomic<br>Type | Coordinates (Angstroms) |           |           |
|------------------|------------------|----------------|-------------------------|-----------|-----------|
|                  |                  |                | X                       | Y         | Z         |
| 1                | 6                | 0              | -0.387203               | -0.474291 | 0.019188  |
| 2                | 6                | 0              | -0.293986               | -1.738959 | 0.623821  |
| 3                | 6                | 0              | -1.399890               | -2.574907 | 0.662832  |
| 4                | 6                | 0              | -2.642641               | -2.198733 | 0.118626  |
| 5                | 6                | 0              | -2.700312               | -0.932465 | -0.493403 |
| 6                | 6                | 0              | -1.607211               | -0.072940 | -0.542714 |

|    |   |   |           |           |           |
|----|---|---|-----------|-----------|-----------|
| 7  | 6 | 0 | -3.783141 | -3.106381 | 0.213730  |
| 8  | 6 | 0 | -5.093681 | -2.779019 | 0.207329  |
| 9  | 6 | 0 | -5.678342 | -1.445244 | 0.097177  |
| 10 | 6 | 0 | -5.022481 | -0.354586 | -0.513226 |
| 11 | 8 | 0 | -3.825320 | -0.522851 | -1.200945 |
| 12 | 6 | 0 | -6.957841 | -1.194260 | 0.618624  |
| 13 | 6 | 0 | -7.559440 | 0.062228  | 0.571033  |
| 14 | 6 | 0 | -6.870895 | 1.125955  | -0.025976 |
| 15 | 6 | 0 | -5.595863 | 0.905783  | -0.570363 |
| 16 | 7 | 0 | 0.776721  | 0.317295  | 0.007381  |
| 17 | 6 | 0 | 0.961473  | 1.590559  | -0.480451 |
| 18 | 8 | 0 | 0.088999  | 2.231346  | -1.062188 |
| 19 | 6 | 0 | 2.341287  | 2.156012  | -0.275498 |
| 20 | 6 | 0 | 3.239283  | 1.649620  | 0.669963  |
| 21 | 6 | 0 | 4.510586  | 2.212274  | 0.802139  |
| 22 | 6 | 0 | 4.881211  | 3.322452  | 0.037838  |
| 23 | 6 | 0 | 3.987634  | 3.820098  | -0.911379 |
| 24 | 6 | 0 | 2.726013  | 3.246644  | -1.067136 |
| 25 | 7 | 0 | 5.384967  | 1.752464  | 1.847146  |
| 26 | 7 | 0 | 5.787282  | 0.572904  | 1.890836  |
| 27 | 8 | 0 | -7.348087 | 2.395555  | -0.141712 |
| 28 | 6 | 0 | -8.643428 | 2.678968  | 0.379129  |
| 29 | 6 | 0 | 5.565585  | -0.356000 | 0.794154  |
| 30 | 6 | 0 | 4.583802  | -1.344110 | 0.837267  |
| 31 | 6 | 0 | 4.493056  | -2.351399 | -0.112674 |
| 32 | 6 | 0 | 5.446225  | -2.367261 | -1.124968 |
| 33 | 6 | 0 | 6.450305  | -1.409344 | -1.210547 |
| 34 | 6 | 0 | 6.509600  | -0.412200 | -0.238589 |
| 35 | 9 | 0 | 3.630962  | -1.283005 | 1.805872  |
| 36 | 9 | 0 | 5.383346  | -3.340624 | -2.052835 |
| 37 | 1 | 0 | 0.647175  | -2.061974 | 1.063549  |
| 38 | 1 | 0 | -1.310918 | -3.550208 | 1.134529  |
| 39 | 1 | 0 | -1.701844 | 0.881857  | -1.037741 |
| 40 | 1 | 0 | -3.528206 | -4.149977 | 0.389561  |
| 41 | 1 | 0 | -5.808796 | -3.581997 | 0.378276  |
| 42 | 1 | 0 | -7.497256 | -2.015554 | 1.084422  |

|    |   |   |           |           |           |
|----|---|---|-----------|-----------|-----------|
| 43 | 1 | 0 | -8.548981 | 0.196397  | 0.991696  |
| 44 | 1 | 0 | -5.070843 | 1.717703  | -1.061938 |
| 45 | 1 | 0 | 1.589113  | -0.142174 | 0.394993  |
| 46 | 1 | 0 | 2.959258  | 0.860349  | 1.357086  |
| 47 | 1 | 0 | 5.858980  | 3.773715  | 0.179425  |
| 48 | 1 | 0 | 4.275470  | 4.668193  | -1.525815 |
| 49 | 1 | 0 | 2.019561  | 3.638779  | -1.790682 |
| 50 | 1 | 0 | -8.817695 | 3.738538  | 0.184624  |
| 51 | 1 | 0 | -9.415619 | 2.083796  | -0.123626 |
| 52 | 1 | 0 | -8.688670 | 2.495366  | 1.459791  |
| 53 | 1 | 0 | 3.710594  | -3.100637 | -0.062215 |
| 54 | 1 | 0 | 7.174580  | -1.453716 | -2.016896 |
| 55 | 1 | 0 | 7.299579  | 0.332205  | -0.270703 |

Visualization of calculated geometry of (**5gZ**) :

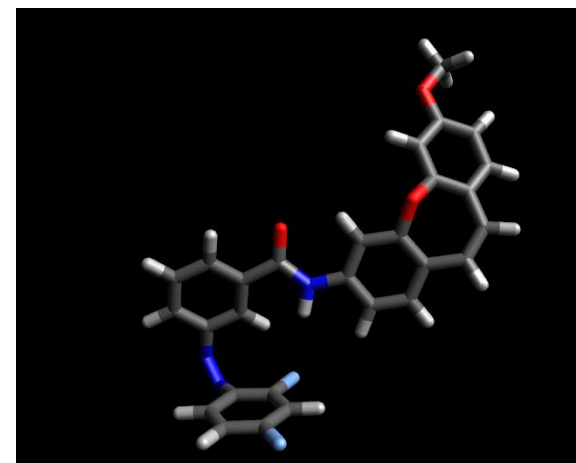

- The calculated coordinates of (**5hE**) ( the part of calculated log file) -

Standard orientation:

| Center<br>Number | Atomic<br>Number | Atomic<br>Type | Coordinates (Angstroms) |           |           |
|------------------|------------------|----------------|-------------------------|-----------|-----------|
|                  |                  |                | X                       | Y         | Z         |
| 1                | 6                | 0              | -1.995284               | -2.076149 | -0.211396 |
| 2                | 6                | 0              | -2.660410               | -3.313355 | -0.221754 |
| 3                | 6                | 0              | -4.011557               | -3.376555 | -0.529523 |
| 4                | 6                | 0              | -4.765726               | -2.227557 | -0.833183 |
| 5                | 6                | 0              | -4.067785               | -1.005302 | -0.834854 |
| 6                | 6                | 0              | -2.715169               | -0.913301 | -0.523969 |
| 7                | 6                | 0              | -6.193215               | -2.346951 | -1.118210 |
| 8                | 6                | 0              | -7.143121               | -1.399554 | -0.959275 |
| 9                | 6                | 0              | -6.966691               | -0.033938 | -0.472601 |
| 10               | 6                | 0              | -5.749127               | 0.674708  | -0.563869 |
| 11               | 8                | 0              | -4.669609               | 0.167760  | -1.278910 |
| 12               | 6                | 0              | -8.040793               | 0.641747  | 0.128673  |

|    |   |   |           |           |           |
|----|---|---|-----------|-----------|-----------|
| 13 | 6 | 0 | -7.929241 | 1.934075  | 0.639492  |
| 14 | 6 | 0 | -6.700057 | 2.599351  | 0.548638  |
| 15 | 6 | 0 | -5.609720 | 1.958084  | -0.060106 |
| 16 | 7 | 0 | -0.624738 | -2.077928 | 0.113636  |
| 17 | 6 | 0 | 0.252573  | -1.018733 | 0.160922  |
| 18 | 8 | 0 | -0.052261 | 0.133498  | -0.140848 |
| 19 | 6 | 0 | 1.648321  | -1.363631 | 0.601288  |
| 20 | 6 | 0 | 2.682176  | -0.527916 | 0.163284  |
| 21 | 6 | 0 | 4.005822  | -0.775316 | 0.536060  |
| 22 | 6 | 0 | 4.306286  | -1.862160 | 1.377685  |
| 23 | 6 | 0 | 3.278808  | -2.678991 | 1.832663  |
| 24 | 6 | 0 | 1.954588  | -2.436700 | 1.449552  |
| 25 | 7 | 0 | 4.961428  | 0.136293  | 0.011414  |
| 26 | 7 | 0 | 6.150684  | -0.125817 | 0.349287  |
| 27 | 6 | 0 | 7.147958  | 0.739159  | -0.128837 |
| 28 | 6 | 0 | 8.470543  | 0.391965  | 0.223595  |
| 29 | 6 | 0 | 9.579626  | 1.132160  | -0.155952 |
| 30 | 6 | 0 | 9.383705  | 2.281286  | -0.922265 |
| 31 | 6 | 0 | 8.098382  | 2.676323  | -1.298088 |
| 32 | 6 | 0 | 7.008143  | 1.913410  | -0.904738 |
| 33 | 9 | 0 | 8.659838  | -0.713246 | 0.961435  |
| 34 | 9 | 0 | 5.790263  | 2.326677  | -1.280621 |
| 35 | 8 | 0 | -6.461306 | 3.860812  | 1.001411  |
| 36 | 6 | 0 | -7.532678 | 4.570150  | 1.616590  |
| 37 | 1 | 0 | -2.115071 | -4.225467 | 0.009898  |
| 38 | 1 | 0 | -4.509797 | -4.342791 | -0.531362 |
| 39 | 1 | 0 | -2.224156 | 0.047667  | -0.556116 |
| 40 | 1 | 0 | -6.522728 | -3.341506 | -1.413826 |
| 41 | 1 | 0 | -8.175888 | -1.694448 | -1.137877 |
| 42 | 1 | 0 | -8.997467 | 0.130080  | 0.203157  |
| 43 | 1 | 0 | -8.793112 | 2.404951  | 1.093560  |
| 44 | 1 | 0 | -4.664101 | 2.479823  | -0.161175 |
| 45 | 1 | 0 | -0.226809 | -2.997013 | 0.258738  |
| 46 | 1 | 0 | 2.459951  | 0.320445  | -0.474704 |
| 47 | 1 | 0 | 5.337401  | -2.038940 | 1.662779  |
| 48 | 1 | 0 | 3.500019  | -3.509308 | 2.497387  |
| 49 | 1 | 0 | 1.168754  | -3.073085 | 1.848541  |
| 50 | 1 | 0 | 10.567652 | 0.804726  | 0.149045  |
| 51 | 1 | 0 | 10.238719 | 2.875589  | -1.229662 |
| 52 | 1 | 0 | 7.925181  | 3.567880  | -1.891777 |
| 53 | 1 | 0 | -7.122867 | 5.541187  | 1.899158  |
| 54 | 1 | 0 | -8.368186 | 4.715507  | 0.920605  |
| 55 | 1 | 0 | -7.892790 | 4.051584  | 2.513776  |

---

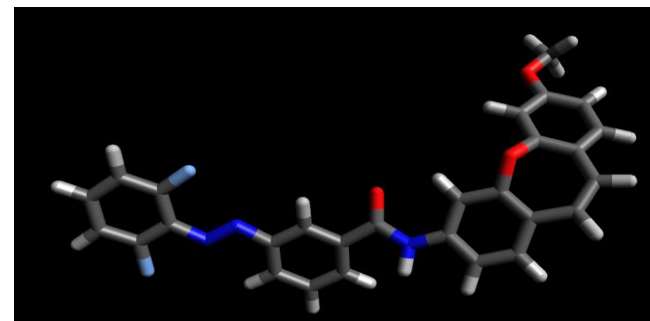

Visualization of calculated geometry of (**5hE**) :

- The calculated coordinates of (**5hZ**) ( the part of calculated log file) -

| Standard orientation: |                  |                |                         |           |           |
|-----------------------|------------------|----------------|-------------------------|-----------|-----------|
| Center<br>Number      | Atomic<br>Number | Atomic<br>Type | Coordinates (Angstroms) |           |           |
|                       |                  |                | X                       | Y         | Z         |
| 1                     | 6                | 0              | 0.579362                | -0.629970 | -1.112025 |
| 2                     | 6                | 0              | 0.755061                | -1.793219 | -1.878277 |
| 3                     | 6                | 0              | 1.917674                | -2.540140 | -1.752903 |
| 4                     | 6                | 0              | 2.953401                | -2.174199 | -0.872845 |
| 5                     | 6                | 0              | 2.739618                | -1.014280 | -0.103950 |
| 6                     | 6                | 0              | 1.588707                | -0.242050 | -0.218243 |
| 7                     | 6                | 0              | 4.168404                | -2.981633 | -0.802249 |
| 8                     | 6                | 0              | 5.401158                | -2.577192 | -0.425408 |
| 9                     | 6                | 0              | 5.808546                | -1.242308 | 0.004232  |
| 10                    | 6                | 0              | 4.921771                | -0.300494 | 0.569681  |
| 11                    | 8                | 0              | 3.619010                | -0.648521 | 0.909768  |
| 12                    | 6                | 0              | 7.144402                | -0.835104 | -0.141721 |
| 13                    | 6                | 0              | 7.590444                | 0.435112  | 0.220091  |
| 14                    | 6                | 0              | 6.677640                | 1.350700  | 0.759193  |
| 15                    | 6                | 0              | 5.337562                | 0.970359  | 0.933160  |
| 16                    | 7                | 0              | -0.639145               | 0.064352  | -1.249236 |
| 17                    | 6                | 0              | -1.011818               | 1.262026  | -0.683243 |
| 18                    | 8                | 0              | -0.262372               | 1.963785  | -0.008600 |
| 19                    | 6                | 0              | -2.435010               | 1.675070  | -0.940632 |
| 20                    | 6                | 0              | -3.475850               | 0.751020  | -1.084287 |
| 21                    | 6                | 0              | -4.785803               | 1.207677  | -1.276040 |
| 22                    | 6                | 0              | -5.054528               | 2.576433  | -1.379619 |
| 23                    | 6                | 0              | -4.020278               | 3.493153  | -1.194777 |
| 24                    | 6                | 0              | -2.719619               | 3.047641  | -0.965894 |
| 25                    | 7                | 0              | -5.862545               | 0.297769  | -1.531358 |
| 26                    | 7                | 0              | -6.127987               | -0.658671 | -0.775645 |
| 27                    | 6                | 0              | -5.485862               | -0.816177 | 0.511060  |
| 28                    | 6                | 0              | -4.677276               | -1.923322 | 0.770422  |
| 29                    | 6                | 0              | -4.201489               | -2.224203 | 2.037375  |

|    |   |   |           |           |           |
|----|---|---|-----------|-----------|-----------|
| 30 | 6 | 0 | -4.577441 | -1.401599 | 3.102601  |
| 31 | 6 | 0 | -5.397811 | -0.292436 | 2.891145  |
| 32 | 6 | 0 | -5.839222 | -0.019096 | 1.603086  |
| 33 | 9 | 0 | -4.299576 | -2.673758 | -0.289171 |
| 34 | 9 | 0 | -6.634951 | 1.045537  | 1.378847  |
| 35 | 8 | 0 | 6.985297  | 2.615764  | 1.156939  |
| 36 | 6 | 0 | 8.334371  | 3.054451  | 1.025646  |
| 37 | 1 | 0 | -0.022112 | -2.113591 | -2.568397 |
| 38 | 1 | 0 | 2.038301  | -3.436725 | -2.355695 |
| 39 | 1 | 0 | 1.473557  | 0.637991  | 0.396668  |
| 40 | 1 | 0 | 4.068041  | -3.999165 | -1.175783 |
| 41 | 1 | 0 | 6.212095  | -3.297482 | -0.519959 |
| 42 | 1 | 0 | 7.857674  | -1.540556 | -0.561289 |
| 43 | 1 | 0 | 8.633985  | 0.692887  | 0.083927  |
| 44 | 1 | 0 | 4.633106  | 1.663465  | 1.380219  |
| 45 | 1 | 0 | -1.282943 | -0.334507 | -1.921191 |
| 46 | 1 | 0 | -3.289566 | -0.317125 | -1.048710 |
| 47 | 1 | 0 | -6.068841 | 2.908058  | -1.581864 |
| 48 | 1 | 0 | -4.229286 | 4.557858  | -1.240561 |
| 49 | 1 | 0 | -1.906411 | 3.751060  | -0.822339 |
| 50 | 1 | 0 | -3.550791 | -3.081544 | 2.174028  |
| 51 | 1 | 0 | -4.222459 | -1.623720 | 4.103870  |
| 52 | 1 | 0 | -5.703640 | 0.357500  | 3.704399  |
| 53 | 1 | 0 | 8.350879  | 4.080123  | 1.397571  |
| 54 | 1 | 0 | 9.015353  | 2.437801  | 1.625362  |
| 55 | 1 | 0 | 8.659374  | 3.041963  | -0.022021 |

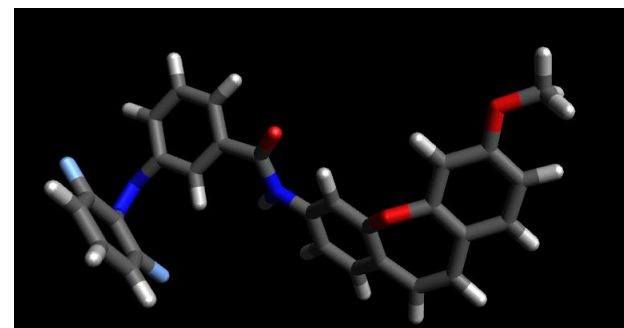

Visualization of calculated geometry of (**5hZ**) :

- The calculated coordinates of (**5hE-syn**) ( the part of calculated log file) -

standard orientation:

| Center<br>Number | Atomic<br>Number | Atomic<br>Type | Coordinates (Angstroms) |          |           |
|------------------|------------------|----------------|-------------------------|----------|-----------|
|                  |                  |                | X                       | Y        | Z         |
| 1                | 6                | 0              | 3.839931                | 0.051783 | -0.840245 |

|    |   |   |           |           |           |
|----|---|---|-----------|-----------|-----------|
| 2  | 6 | 0 | 3.901615  | 0.518215  | -2.160312 |
| 3  | 6 | 0 | 3.220316  | 1.675564  | -2.520531 |
| 4  | 6 | 0 | 2.437270  | 2.398172  | -1.601662 |
| 5  | 6 | 0 | 2.434283  | 1.933010  | -0.272492 |
| 6  | 6 | 0 | 3.125541  | 0.791062  | 0.111543  |
| 7  | 6 | 0 | 1.651317  | 3.547215  | -2.045681 |
| 8  | 6 | 0 | 0.498749  | 3.997122  | -1.501213 |
| 9  | 6 | 0 | -0.202157 | 3.462642  | -0.336383 |
| 10 | 6 | 0 | 0.446951  | 2.769212  | 0.706895  |
| 11 | 8 | 0 | 1.835424  | 2.673191  | 0.741215  |
| 12 | 6 | 0 | -1.592681 | 3.617398  | -0.213501 |
| 13 | 6 | 0 | -2.315932 | 3.096794  | 0.858073  |
| 14 | 6 | 0 | -1.637677 | 2.404005  | 1.870292  |
| 15 | 6 | 0 | -0.245650 | 2.247846  | 1.786970  |
| 16 | 7 | 0 | 4.542490  | -1.129500 | -0.495035 |
| 17 | 6 | 0 | 4.251857  | -2.109784 | 0.426041  |
| 18 | 8 | 0 | 5.132649  | -2.882655 | 0.801709  |
| 19 | 6 | 0 | 2.841702  | -2.259147 | 0.920989  |
| 20 | 6 | 0 | 1.725781  | -2.080535 | 0.095954  |
| 21 | 6 | 0 | 0.435023  | -2.276864 | 0.599199  |
| 22 | 6 | 0 | 0.251954  | -2.671405 | 1.935821  |
| 23 | 6 | 0 | 1.363053  | -2.878582 | 2.746114  |
| 24 | 6 | 0 | 2.652737  | -2.684990 | 2.242373  |
| 25 | 7 | 0 | -0.611262 | -2.051498 | -0.332957 |
| 26 | 7 | 0 | -1.761533 | -2.004838 | 0.185465  |
| 27 | 6 | 0 | -2.825863 | -1.811607 | -0.716324 |
| 28 | 6 | 0 | -4.024704 | -1.309777 | -0.172976 |
| 29 | 6 | 0 | -5.172405 | -1.102261 | -0.921884 |
| 30 | 6 | 0 | -5.151659 | -1.430486 | -2.278187 |
| 31 | 6 | 0 | -3.998086 | -1.952177 | -2.865809 |
| 32 | 6 | 0 | -2.860128 | -2.130704 | -2.090779 |
| 33 | 9 | 0 | -4.042521 | -0.993293 | 1.135517  |
| 34 | 9 | 0 | -1.778384 | -2.664464 | -2.677501 |
| 35 | 8 | 0 | -2.222883 | 1.867107  | 2.974308  |
| 36 | 6 | 0 | -3.645899 | 1.866631  | 3.051320  |
| 37 | 1 | 0 | 4.470512  | -0.036587 | -2.901234 |

|    |   |   |           |           |           |
|----|---|---|-----------|-----------|-----------|
| 38 | 1 | 0 | 3.265144  | 2.019144  | -3.550984 |
| 39 | 1 | 0 | 3.111494  | 0.500819  | 1.155123  |
| 40 | 1 | 0 | 1.989461  | 4.015112  | -2.968463 |
| 41 | 1 | 0 | -0.018769 | 4.800540  | -2.023284 |
| 42 | 1 | 0 | -2.125862 | 4.155396  | -0.993752 |
| 43 | 1 | 0 | -3.389495 | 3.239283  | 0.896625  |
| 44 | 1 | 0 | 0.287715  | 1.728714  | 2.575658  |
| 45 | 1 | 0 | 5.478561  | -1.229622 | -0.883276 |
| 46 | 1 | 0 | 1.828339  | -1.784576 | -0.942082 |
| 47 | 1 | 0 | -0.755788 | -2.815270 | 2.309744  |
| 48 | 1 | 0 | 1.229998  | -3.197780 | 3.776138  |
| 49 | 1 | 0 | 3.522550  | -2.861984 | 2.867009  |
| 50 | 1 | 0 | -6.056263 | -0.696487 | -0.441428 |
| 51 | 1 | 0 | -6.041533 | -1.281224 | -2.881914 |
| 52 | 1 | 0 | -3.965222 | -2.227545 | -3.914839 |
| 53 | 1 | 0 | -3.890603 | 1.372614  | 3.993245  |
| 54 | 1 | 0 | -4.049961 | 2.886492  | 3.063597  |
| 55 | 1 | 0 | -4.082968 | 1.302373  | 2.220165  |

---

Visualization of calculated geometry of (**5hE-syn**):

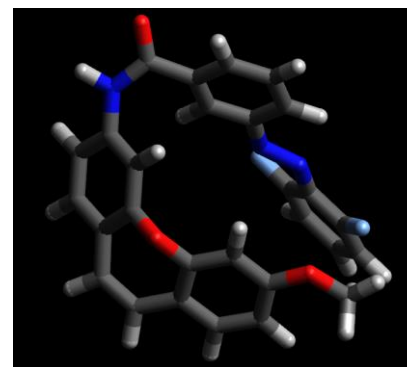

## 1.2 Molecular Orbitals-

1) Molecular orbitals for the **4aE model system**, HOMO on the left, LUMO on the right.

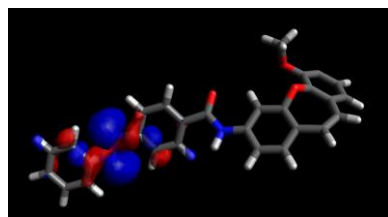

HOMO (-6.430 eV)

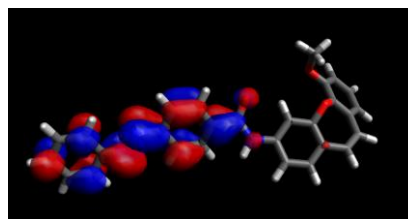

LUMO (-2.616 eV)

2) Molecular orbitals for the **4aZ model system**, HOMO on the left, LUMO on the right.

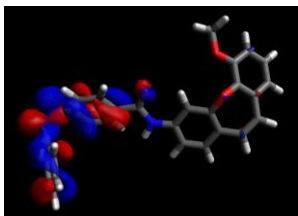

HOMO (-6.100 eV)

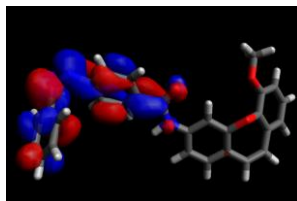

LUMO (-2.399 eV)

3) Molecular orbitals for the **4bE model system**, HOMO on the left, LUMO on the right.

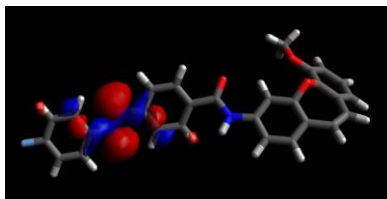

HOMO (-6.478 eV)

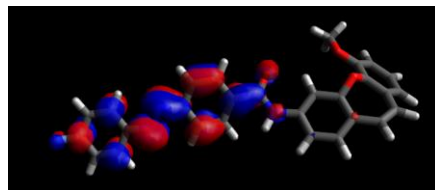

LUMO (-2.627 eV)

4) Molecular orbitals for the **4bZ model system**, HOMO on the left, LUMO on the right.

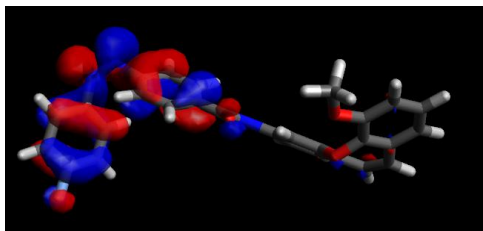

HOMO (-6.107 eV)

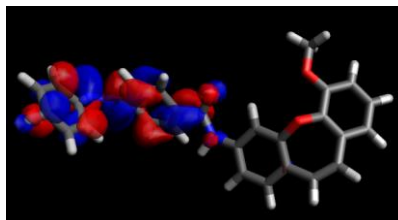

LUMO (-2.415 eV)

5) Molecular orbitals for the **4cE model system**, HOMO on the left, LUMO on the right.

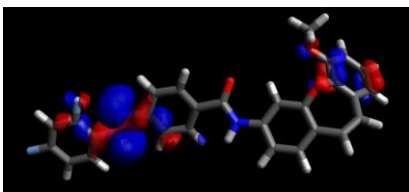

HOMO (-6.410 eV)

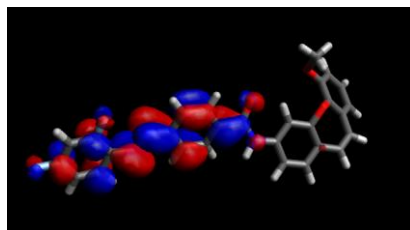

LUMO (-2.641 eV)

6) Molecular orbitals for the **4cZ model system**, HOMO on the left, LUMO on the right.

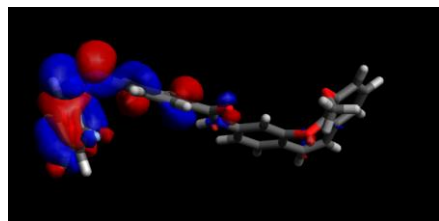

HOMO (-6.228 eV)

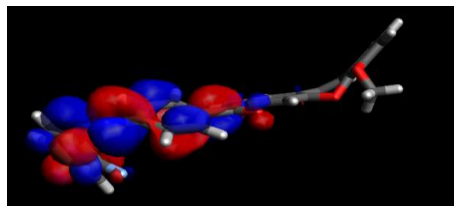

LUMO (-2.517 eV)

7) Molecular orbitals for the **4dE model system**, HOMO on the left, LUMO on the right.

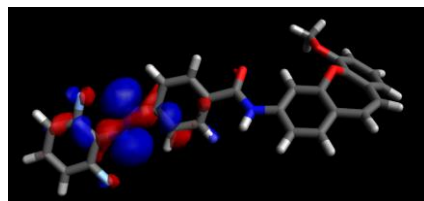

HOMO (-6.413 eV)

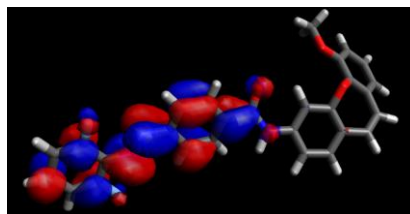

LUMO (-2.712 eV)

8) Molecular orbitals for the **4dZ model system**, HOMO on the left, LUMO on the right.

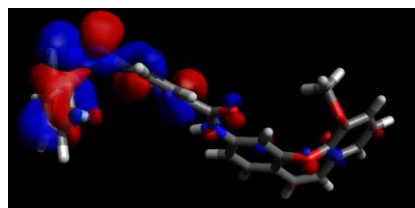

HOMO (-6.334 eV)

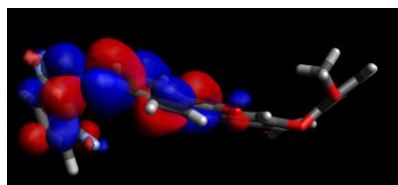

LUMO (-2.587 eV)

9) Molecular orbitals for the **4eE model system**, HOMO on the left, LUMO on the right.

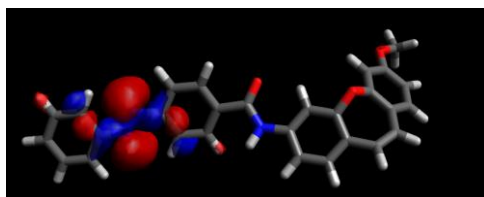

HOMO (-6.434 eV)

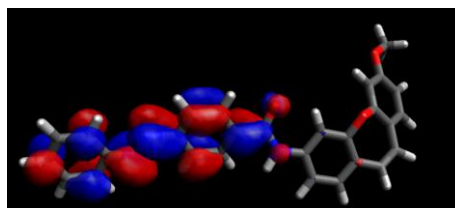

LUMO (-2.618 eV)

10) Molecular orbitals for the **4eZ model system**, HOMO on the left, LUMO on the right.

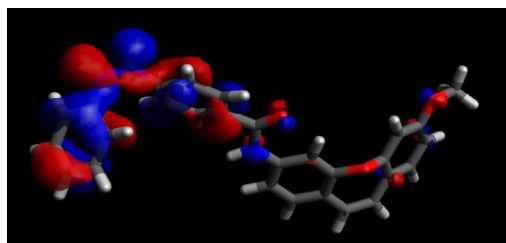

HOMO (-6.081 eV)

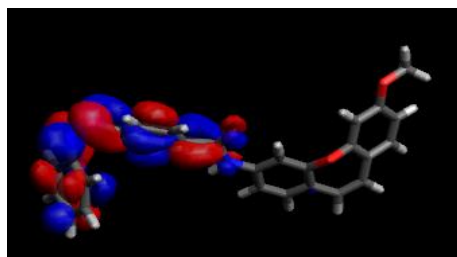

LUMO(-2.415 eV)

11) Molecular orbitals for the **4fE model system**, HOMO on the left, LUMO on the right.

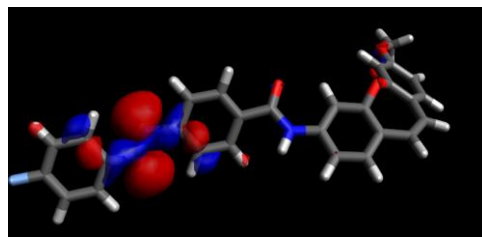

HOMO (-6.480 eV)

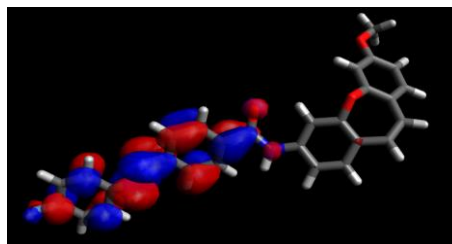

LUMO (-2.629 eV)

12) Molecular orbitals for the **4fZ model system**, HOMO on the left, LUMO on the right.

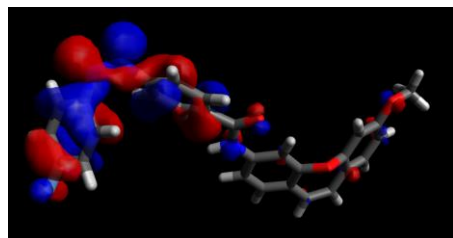

HOMO (-6.096 eV)

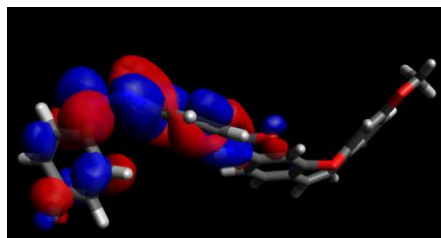

LUMO (-2.433 eV)

13) Molecular orbitals for the **4gE model system**, HOMO on the left, LUMO on the right.

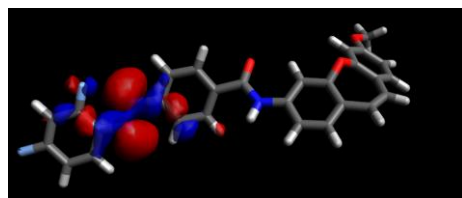

HOMO (-6.409 eV)

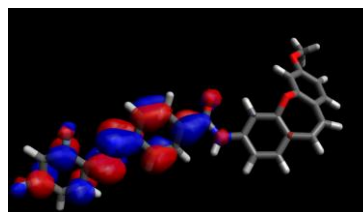

LUMO (-2.639 eV)

14) Molecular orbitals for the **4gZ model system**, HOMO on the left, LUMO on the right.

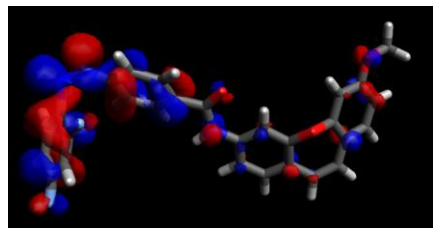

HOMO (-6.220 eV)

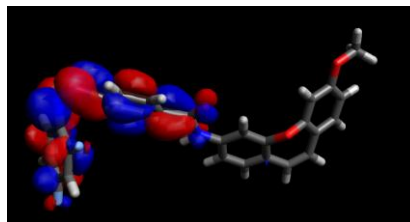

LUMO (-2.525 eV)

15) Molecular orbitals for the **4hE model system**, HOMO on the left, LUMO on the right.

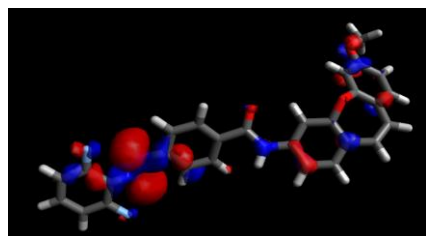

HOMO (-6.422 eV)

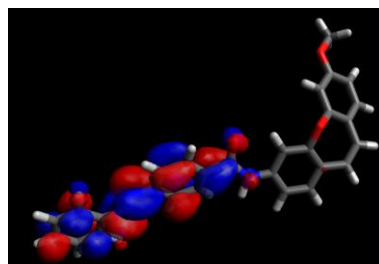

LUMO (-2.717 eV)

16) Molecular orbitals for the **4hZ model system**, HOMO on the left, LUMO on the right.

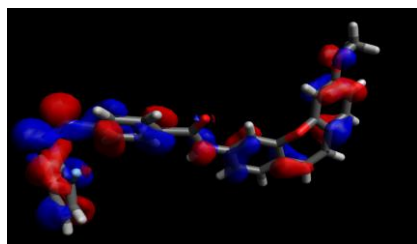

HOMO (-6.311 eV)

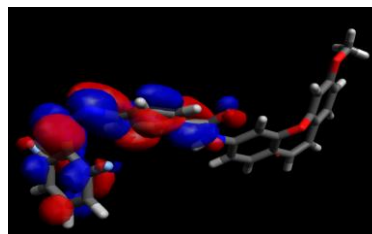

LUMO (-2.577 eV)

17) Molecular orbitals for the **5aE model system**, HOMO on the left, LUMO on the right.

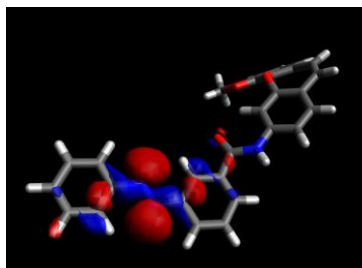

HOMO (-6.403 eV)

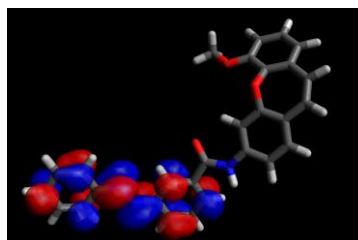

LUMO (-2.465 eV)

18) Molecular orbitals for the **5aZ model system**, HOMO on the left, LUMO on the right.

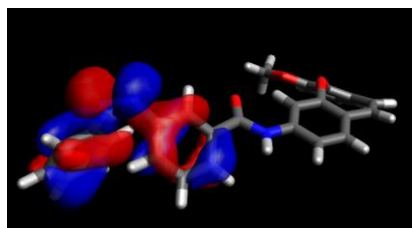

HOMO (-6.075 eV)

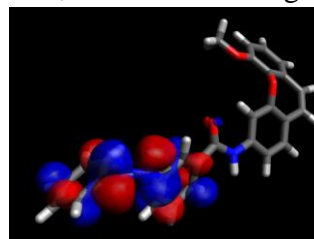

LUMO (-2.280 eV)

19) Molecular orbitals for the **5bE model system**, HOMO on the left, LUMO on the right.

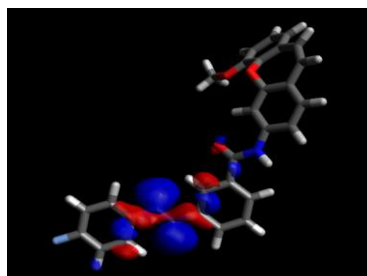

HOMO (-6.452 eV)

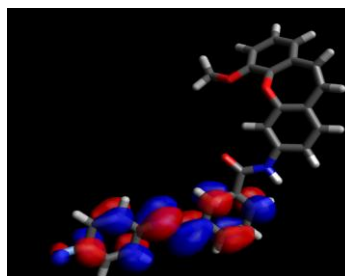

LUMO (-2.479 eV)

20) Molecular orbitals for the **5bZ model system**, HOMO on the left, LUMO on the right.

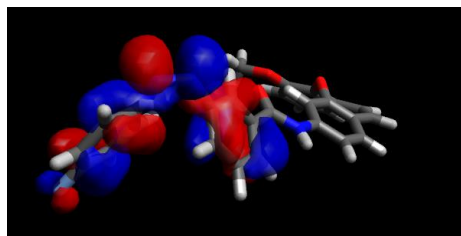

HOMO (-6.088 eV)

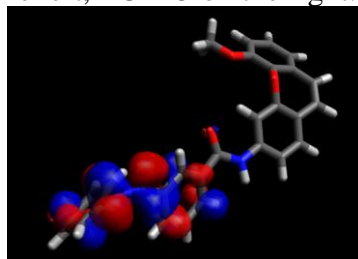

LUMO (-2.315 eV)

21) Molecular orbitals for the **5cE model system**, HOMO on the left, LUMO on the right.

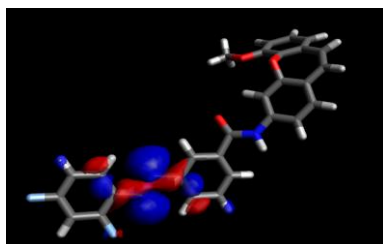

HOMO (-6.529 eV)

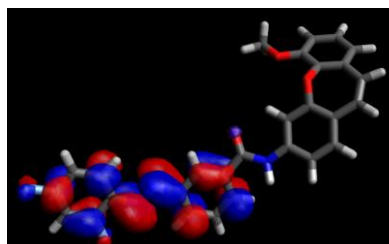

LUMO (-2.592 eV)

22) Molecular orbitals for the **5cZ model system**, HOMO on the left, LUMO on the right.

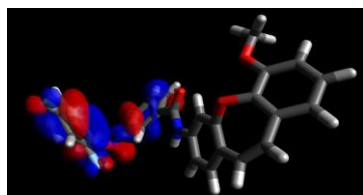

HOMO (-6.314 eV)

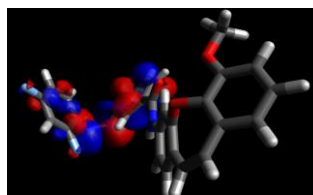

LUMO (-2.230 eV)

23) Molecular orbitals for the **5dE model system**, HOMO on the left, LUMO on the right.

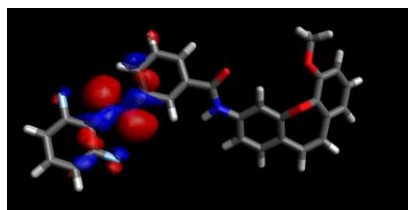

HOMO (-6.418 eV)

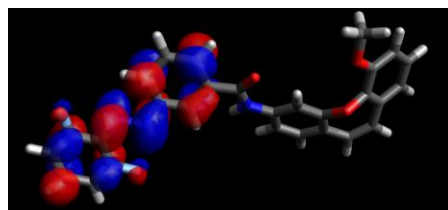

LUMO (-2.601 eV)

24) Molecular orbitals for the **5dZ model system**, HOMO on the left, LUMO on the right.

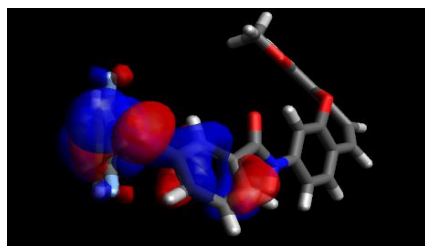

HOMO (-6.328 eV)

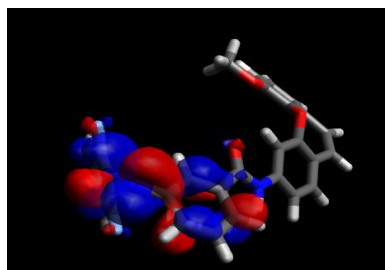

LUMO (-2.448 eV)

25) Molecular orbitals for the **5eE model system**, HOMO on the left, LUMO on the right.

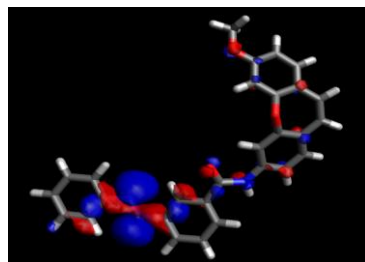

HOMO (-6.408 eV)

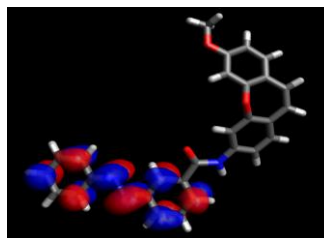

LUMO (-2.466 eV)

26) Molecular orbitals for the **5eZ model system**, HOMO on the left, LUMO on the right.

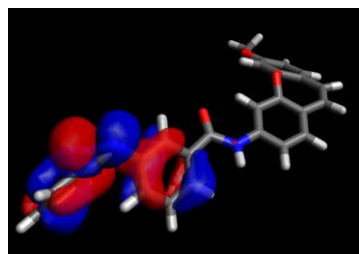

HOMO (-6.067 eV)

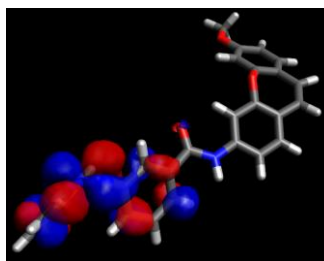

LUMO (-2.287 eV)

27) Molecular orbitals for the **5fE model system**, HOMO on the left, LUMO on the right.

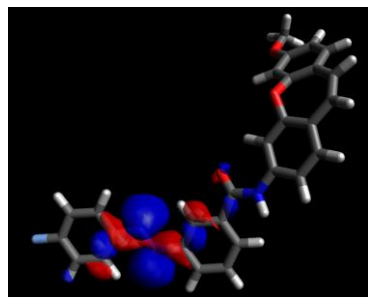

HOMO (-6.453 eV)

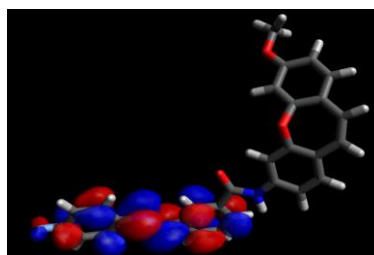

LUMO (-2.48 eV)

28) Molecular orbitals for the **5fZ model system**, HOMO on the left, LUMO on the right.

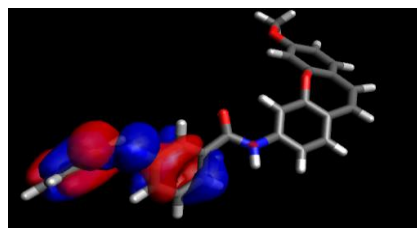

HOMO (-6.091 eV)

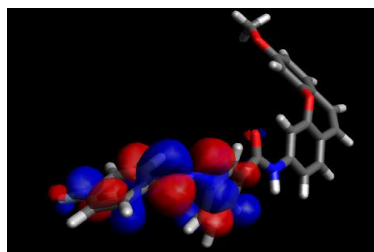

LUMO (-2.309 eV)

29) Molecular orbitals for the **5gE model system**, HOMO on the left, LUMO on the right.

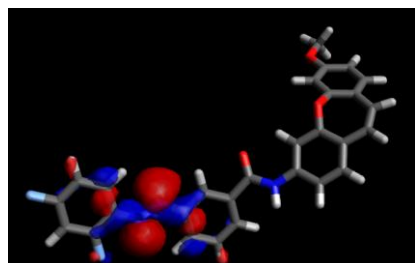

HOMO (-6.532 eV)

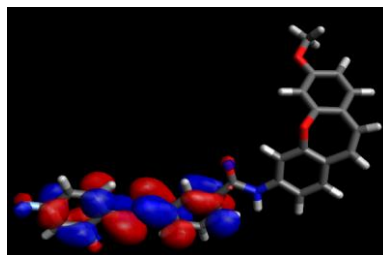

LUMO (-2.593 eV)

30) Molecular orbitals for the **5gZ model system**, HOMO on the left, LUMO on the right.

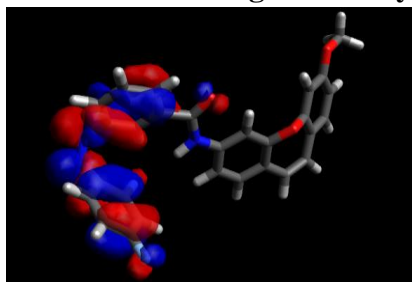

HOMO (-6.434 eV)

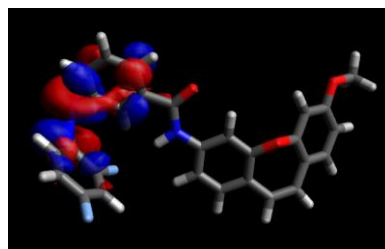

LUMO (-2.347 eV)

31) Molecular orbitals for the **5hE model system**, HOMO on the left, LUMO on the right.

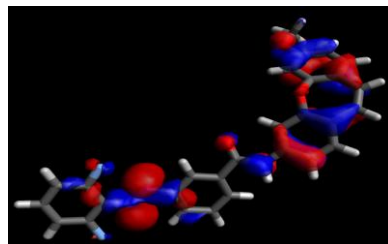

HOMO (-6.401 eV)

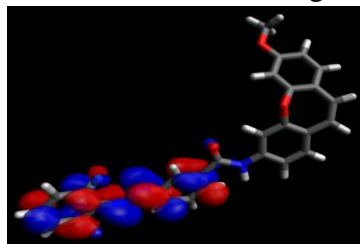

LUMO (-2.595 eV)

32) Molecular orbitals for the **5hZ model system**, HOMO on the left, LUMO on the right.

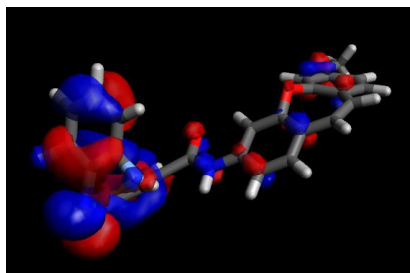

HOMO (-6.442 eV)

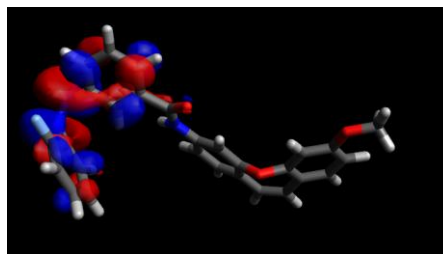

LUMO (-2.416 eV)

**Table 1S.** Dihedral angles for the C-N=N-C bond [°] and distance[Å] within investigated model systems obtained from optimized geometries.

| Compound    | Dihedral angle [°] | Distance [Å]                               |
|-------------|--------------------|--------------------------------------------|
|             | C-N=N-C            | CO----H in<br>dibenzo[ <i>b,f</i> ]oxepine |
| <b>4a E</b> | 180                | 2.223                                      |
| <b>4a Z</b> | 10.4               | 2.227                                      |
| <b>4b E</b> | 179.9              | 2.226                                      |
| <b>4b Z</b> | 10.2               | 2.229                                      |
| <b>4c E</b> | 180                | 2.217                                      |
| <b>4c Z</b> | 9.8                | 2.218                                      |
| <b>4d E</b> | 179.7              | 2.227                                      |
| <b>4d Z</b> | 10.6               | 2.211                                      |
| <b>4e E</b> | 179.9              | 2.211                                      |
| <b>4e Z</b> | 11.2               | 2.211                                      |
| <b>4f E</b> | 179.9              | 2.211                                      |

|                    |       |       |
|--------------------|-------|-------|
| <b>4f <i>Z</i></b> | 10.7  | 2.210 |
| <b>4g <i>E</i></b> | 180   | 2.212 |
| <b>4g <i>Z</i></b> | 9.8   | 2.209 |
| <b>4h <i>E</i></b> | 179.7 | 2.209 |
| <b>4h <i>Z</i></b> | 10.6  | 2.209 |
|                    |       |       |
| <b>5a <i>E</i></b> | 179.8 | 2.224 |
| <b>5a <i>Z</i></b> | 9.9   | 2.226 |
| <b>5b <i>E</i></b> | 179.8 | 2.224 |
| <b>5b <i>Z</i></b> | 9.9   | 2.231 |
| <b>5c <i>E</i></b> | 180   | 2.225 |
| <b>5c <i>Z</i></b> | 9.6   | 2.229 |
| <b>5d <i>E</i></b> | 180   | 2.225 |
| <b>5d <i>Z</i></b> | 10.4  | 2.225 |
| <b>5e <i>E</i></b> | 179.8 | 2.215 |
| <b>5e <i>Z</i></b> | 10.6  | 2.217 |
| <b>5f <i>E</i></b> | 179.9 | 2.211 |
| <b>5f <i>Z</i></b> | 9.7   | 2.206 |
| <b>5g <i>E</i></b> | 179.8 | 2.214 |
| <b>5g <i>Z</i></b> | 9.3   | 2.243 |
| <b>5h <i>E</i></b> | 179.7 | 2.213 |
| <b>5h <i>Z</i></b> | 8.6   | 2.222 |

### 1.3. Molecular docking

Molecular docking of compounds of **4a-4h** and **5a-5h** isomers **E** and **Z** into the 3D X-ray structure of tubulin (PDB code: 1SA0)[3] as carried out using the Auto-Dock Vina software (the Broyden-Fletcher-Goldfarb-Shanno (BFGS) method) [4]. Configurations of protein/dimethoxydibenzo[*b,f*]oxepine complex were created using UCSF Chimera software [5]. The graphical user interface ADT was employed to set up the enzyme: all hydrogens were added. For macromolecules, generated pdbqt files were saved. The 3D structures of ligand molecules were built, optimized (B3LYP functional and 6-31\* basis set level, for **E**, **Z** isomer; and saved in Mol2 format. The graphical user interface ADT was also employed to set up the ligand and the pdbqt file was saved. Auto-Dock Vina software was employed for all docking calculations. The AutoDockTools program was used to generate the docking input files. In docking a grid box size 21 x 21 x 21 points in x, y, and z directions were built, the maps were center located (39.82, 53.24, -8.21) in the catalytic site of the protein. A grid spacing of 0.375 Å (approximately one-fourth of the length of a carbon-carbon covalent bond) was used for the calculation of the energetic map. All computations were performed on an Intel®Core™ i7-4702MQ 3.2 GHz processor running Ubuntu 18.04 Work-station Linux distribution. PyMOL software (www.pymol.org/) was used to analyze the docking results [6]. The Protein-Ligand Interaction Profiler (PLIP) was used in order to predict protein-docked ligand interactions [7]

**Table 2S. The binding position, type of interaction and active residues for *E* and *Z* isomers 4a-4h and 5a-5h.**

| Compound   | Binding pose and interactions                                                       | Type of interaction      | Active residues |
|------------|-------------------------------------------------------------------------------------|--------------------------|-----------------|
| <b>4aE</b> | 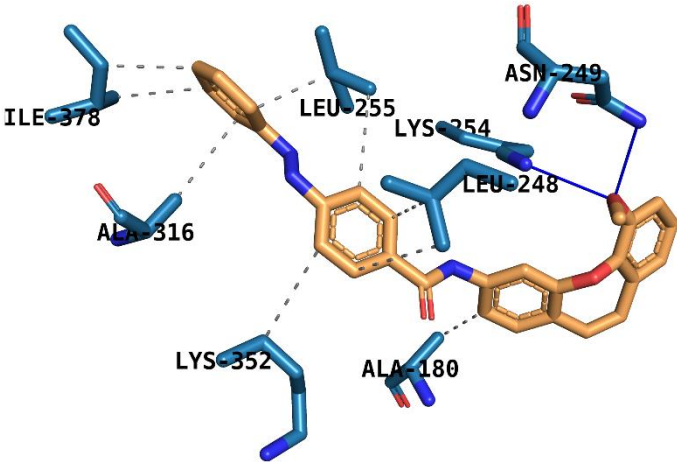 | Hydrophobic Interactions | Ala180          |
|            |                                                                                     |                          | Leu248          |
|            |                                                                                     |                          | Ala316          |
|            |                                                                                     |                          | Lys352          |
|            |                                                                                     |                          | Ile378          |
|            |                                                                                     | Hydrogen Bonds           | Asn249          |
|            |                                                                                     |                          | Lys254          |
|            |                                                                                     | Hydrophobic Interactions | Ala180          |
|            |                                                                                     |                          | Val238          |

|     |                                                                                     |                          |                                                                                                            |
|-----|-------------------------------------------------------------------------------------|--------------------------|------------------------------------------------------------------------------------------------------------|
| 4aZ | 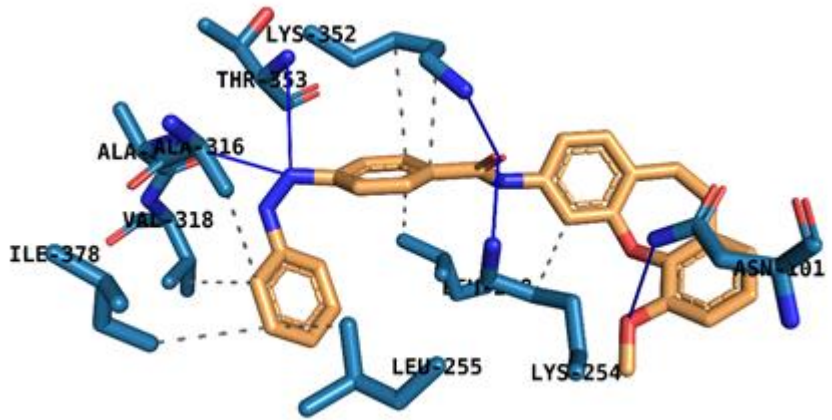  |                          | Leu248                                                                                                     |
|     |                                                                                     | Hydrogen Bonds           | Lys254<br>Leu255<br>Ala316<br>Val318<br>Ala354<br>Ile378<br>Asn101<br>Lys254<br>Ala317<br>Lys352<br>Thr353 |
| 4bE |  | Hydrophobic Interactions | Ala180<br>Leu248<br>Leu255<br>Ala316<br>Val318<br>Lys352<br>Ile378                                         |
|     |                                                                                     | Hydrogen Bonds           | Asn249<br>Lys254<br>Lys352                                                                                 |
| 4bZ |                                                                                     | Hydrophobic Interactions | Leu248                                                                                                     |

|                |                                                                                      |                          |                            |        |
|----------------|--------------------------------------------------------------------------------------|--------------------------|----------------------------|--------|
|                | 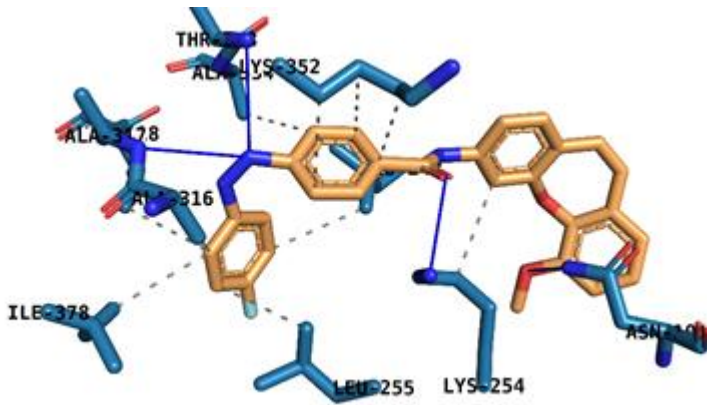   |                          | Lys254                     |        |
|                |                                                                                      |                          | Leu255                     |        |
|                |                                                                                      |                          | Ala316                     |        |
|                |                                                                                      |                          | Val318                     |        |
|                |                                                                                      |                          | Lys352                     |        |
|                |                                                                                      |                          | Ala354                     |        |
|                |                                                                                      |                          | Ile378                     |        |
| Hydrogen Bonds | Asn101                                                                               |                          |                            |        |
|                | Lys254                                                                               |                          |                            |        |
|                | Ala317                                                                               |                          |                            |        |
|                | Thr353                                                                               |                          |                            |        |
| 4cE            |   |                          | Ala180                     |        |
|                |                                                                                      |                          | Leu248                     |        |
|                |                                                                                      |                          | Val318                     |        |
|                |                                                                                      |                          | Lys352                     |        |
|                |                                                                                      |                          | Ile378                     |        |
|                |                                                                                      |                          | Hydrogen Bonds             | Asn249 |
|                |                                                                                      |                          | $\pi$ -Cation Interactions | Lys254 |
| 4cZ            |  | Hydrophobic Interactions | Asn101                     |        |
|                |                                                                                      |                          | Leu248                     |        |
|                |                                                                                      |                          | Leu255                     |        |
|                |                                                                                      |                          | Lys352                     |        |
|                |                                                                                      |                          | Ala354                     |        |
|                |                                                                                      | Hydrogen Bonds           | Gly144                     |        |
|                |                                                                                      |                          | Lys253                     |        |

|     |                                                                                    |                          |        |
|-----|------------------------------------------------------------------------------------|--------------------------|--------|
|     |                                                                                    | Halogen Bonds            | Gln11  |
| 4dE | 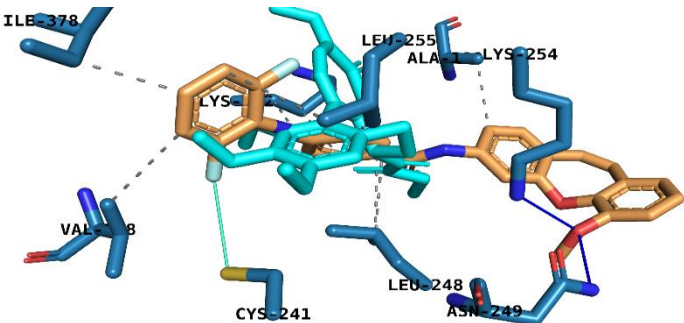 | Hydrophobic Interactions | Ala180 |
|     |                                                                                    |                          | Leu248 |
|     |                                                                                    |                          | Leu255 |
|     |                                                                                    |                          | Val318 |
|     |                                                                                    |                          | Lys352 |
|     |                                                                                    |                          | Ile378 |
|     |                                                                                    | Hydrogen Bonds           | Asn249 |
|     |                                                                                    |                          | Lys254 |
|     |                                                                                    | Halogen Bonds            | Cys241 |
| 4dZ |  | Hydrophobic Interactions | Ala180 |
|     |                                                                                    |                          | Leu248 |
|     |                                                                                    |                          | Lys254 |
|     |                                                                                    |                          | Leu255 |
|     |                                                                                    |                          | Ala180 |
|     |                                                                                    |                          | Val318 |
|     |                                                                                    |                          | Lys352 |
|     |                                                                                    |                          | Ala354 |
| 4eE |                                                                                    | Hydrophobic Interactions | Leu248 |
|     |                                                                                    |                          | Leu255 |
|     |                                                                                    |                          | Phe268 |
|     |                                                                                    |                          | Ala316 |
|     |                                                                                    |                          | Met325 |
|     |                                                                                    |                          | Val355 |

|     |                                                                                     |                          |        |
|-----|-------------------------------------------------------------------------------------|--------------------------|--------|
|     | 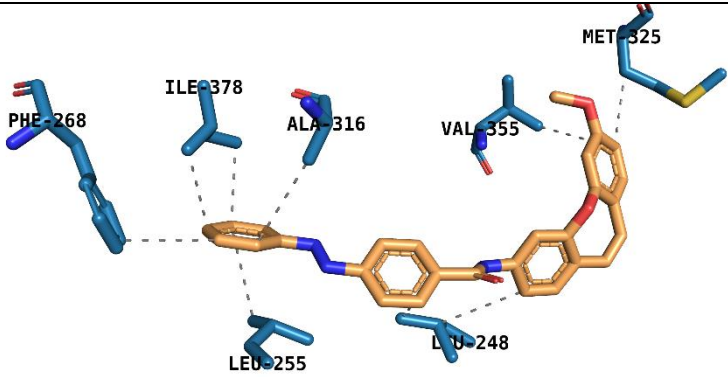  |                          | Ile378 |
| 4eZ |  | Hydrophobic Interactions | Gln11  |
|     |                                                                                     |                          | Leu248 |
|     |                                                                                     |                          | Lys254 |
|     |                                                                                     |                          | Leu255 |
|     |                                                                                     |                          | Lys352 |
|     |                                                                                     |                          | Ala354 |
|     |                                                                                     | Hydrogen Bonds           | Gly144 |
|     |                                                                                     |                          | Thr179 |
|     |                                                                                     |                          | Lys254 |
| 4fE |                                                                                     | Hydrophobic Interactions | Ala180 |
|     |                                                                                     |                          | Val238 |
|     |                                                                                     |                          | Leu248 |
|     |                                                                                     |                          | Ala250 |
|     |                                                                                     |                          | Ala316 |
|     |                                                                                     |                          | Val318 |

|     |                                                                                     |                          |        |
|-----|-------------------------------------------------------------------------------------|--------------------------|--------|
|     | 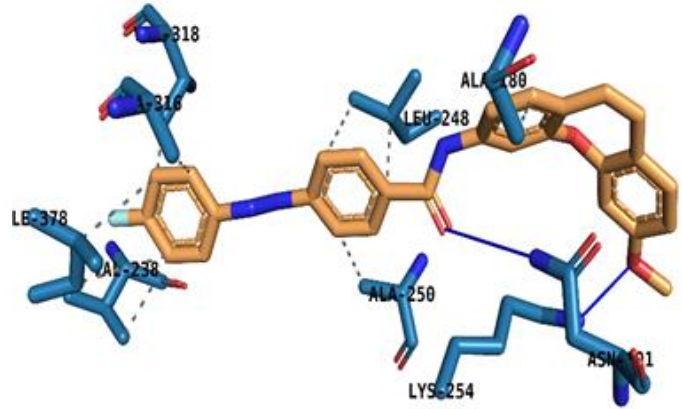  |                          | Ile378 |
|     |                                                                                     |                          | Asn101 |
|     |                                                                                     | Hydrogen Bonds           | Lys254 |
| 4fZ |  | Hydrophobic Interactions | Asn101 |
|     |                                                                                     |                          | Leu248 |
|     |                                                                                     |                          | Lys254 |
|     |                                                                                     |                          | Ala316 |
|     |                                                                                     |                          | Lys352 |
|     |                                                                                     | Hydrogen Bonds           | Gly144 |
|     |                                                                                     |                          | Lys254 |

|     |                                                                                     |                          |                                                                                        |
|-----|-------------------------------------------------------------------------------------|--------------------------|----------------------------------------------------------------------------------------|
| 4gE | 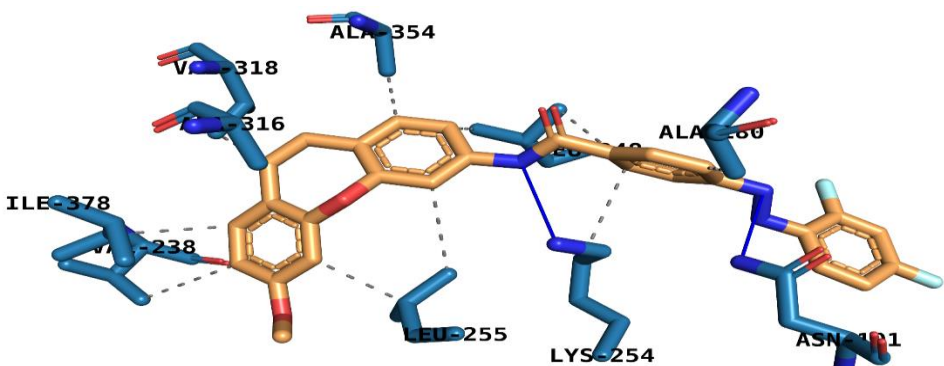  | Hydrophobic Interactions | Ala180<br>Val238<br>Leu248<br>Lys254<br>Leu255<br>Ala316<br>Val318<br>Ala354<br>Ile378 |
|     |                                                                                     | Hydrogen Bonds           | Asn101<br>Lys254                                                                       |
| 4gZ |  | Hydrophobic Interactions | Leu248<br>Lys254<br>Leu255<br>Lys352                                                   |
|     |                                                                                     | Hydrogen Bonds           | Ala100<br>Lys254<br>Ala317<br>Lys352<br>Thr353                                         |

|     |                                                                                     |                            |                                                                                                  |
|-----|-------------------------------------------------------------------------------------|----------------------------|--------------------------------------------------------------------------------------------------|
| 4hE | 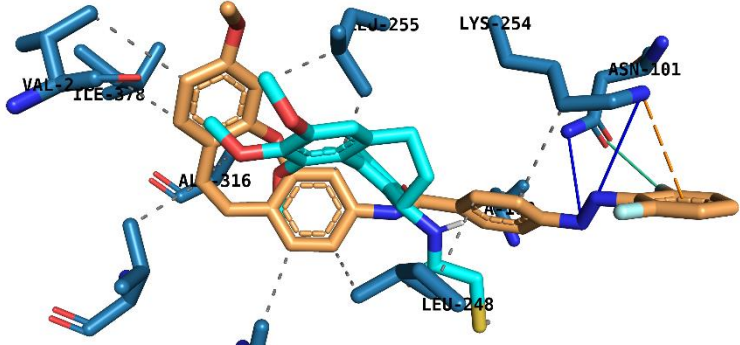  | Hydrophobic Interactions   | Ala180<br>Val238<br>Leu248<br>Lys254<br>Leu255<br>Ala316<br>Val318<br>Ala354<br>Ile378<br>Asn101 |
|     |                                                                                     | Hydrogen Bonds             | Asn101<br>Lys254                                                                                 |
|     |                                                                                     | $\pi$ -Cation Interactions | Lys254                                                                                           |
|     |                                                                                     | Halogen Bonds              | Asn101                                                                                           |
| 4hZ |  | Hydrophobic Interactions   | Ala180<br>Leu248<br>Lys254<br>Leu255<br>Ala316<br>Val318<br>Lys352                               |

| Compound | Binding pose and interactions                                                       | Type of interaction      | Active residues                                                              |
|----------|-------------------------------------------------------------------------------------|--------------------------|------------------------------------------------------------------------------|
| 5aE      | 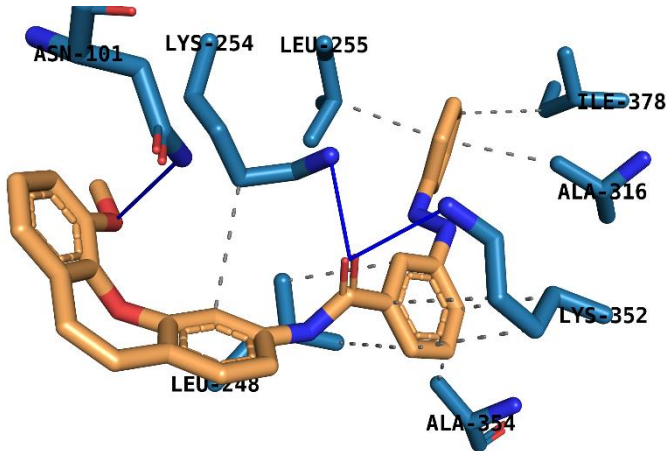  | Hydrophobic Interactions | Leu248<br>Lys254<br>Leu255<br>Ala316<br>Lys352<br>Ala354<br>Ile378           |
|          |                                                                                     | Hydrogen Bonds           | Asn101<br>Lys254<br>Lys352                                                   |
| 5aZ      |  | Hydrophobic Interactions | Ala180<br>Leu248<br>Lys254<br>Leu255<br>Ala316<br>Val318<br>Ala354<br>Ile378 |
|          |                                                                                     | Hydrogen Bonds           | Ser178                                                                       |

|            |                                                                                     |                            |                                                                                        |
|------------|-------------------------------------------------------------------------------------|----------------------------|----------------------------------------------------------------------------------------|
| <b>5bE</b> | 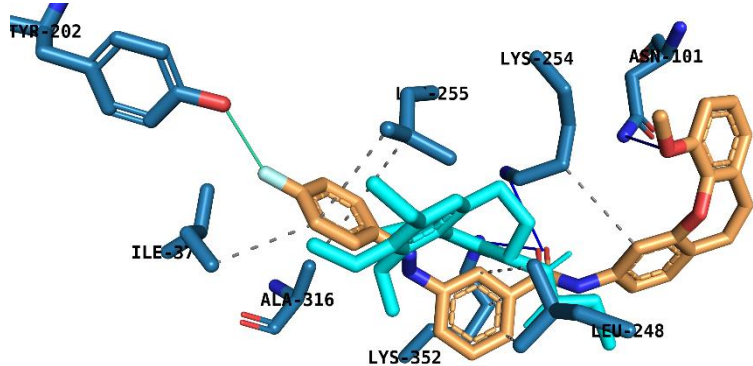  | Hydrophobic Interactions   | Leu248<br>Lys254<br>Leu255<br>Ala316<br>Lys352<br>Ile378                               |
|            |                                                                                     | Hydrogen Bonds             | Asn101<br>Lys254<br>Lys352                                                             |
|            |                                                                                     | Halogen Bonds              | Thr202                                                                                 |
| <b>5bZ</b> |   | Hydrophobic Interactions   | Asn101<br>Ala180<br>Leu248<br>Lys254<br>Leu255<br>Lys352<br>Ala354                     |
|            |                                                                                     | Hydrogen Bonds             | Thr179<br>Lys254                                                                       |
|            |                                                                                     | $\pi$ -Cation Interactions | Lys352                                                                                 |
| <b>5cE</b> |  | Hydrophobic Interactions   | Gln247<br>Leu248<br>Leu255<br>Asn258<br>Ala316<br>Lys352<br>Ala354<br>Val355<br>Ile378 |
|            |                                                                                     | Hydrogen Bonds             | Ser178                                                                                 |

|            |                                                                                     |                            |                                                                              |
|------------|-------------------------------------------------------------------------------------|----------------------------|------------------------------------------------------------------------------|
| <b>5cZ</b> | 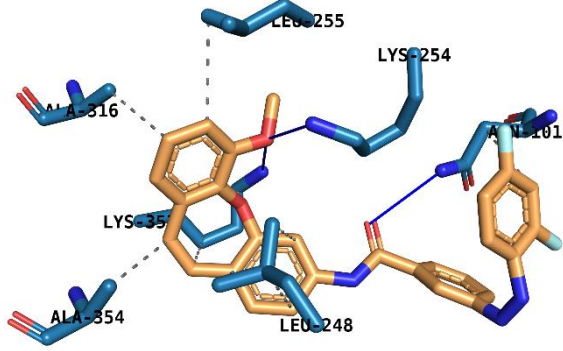  | Hydrophobic Interactions   | Asn101<br>Leu248<br>Leu255<br>Ala316<br>Lys352<br>Ala354                     |
|            |                                                                                     | Hydrogen Bonds             | Asn101<br>Lys254<br>Lys352                                                   |
| <b>5dE</b> |   | Hydrophobic Interactions   | Val181<br>Leu248<br>Lys254<br>Leu255<br>Asn258<br>Val318<br>Lys352<br>Ile378 |
|            |                                                                                     | Hydrogen Bonds             | Lys254                                                                       |
|            |                                                                                     | $\pi$ -Cation Interactions | Lys254                                                                       |
| <b>5dZ</b> |  | Hydrophobic Interactions   | Ala180<br>Leu248<br>Lys254<br>Leu255<br>Ala354<br>Ile378                     |
|            |                                                                                     | Hydrogen Bonds             | Ser178                                                                       |

|            |                                                                                      |                          |                                                                             |
|------------|--------------------------------------------------------------------------------------|--------------------------|-----------------------------------------------------------------------------|
| <b>5eE</b> | 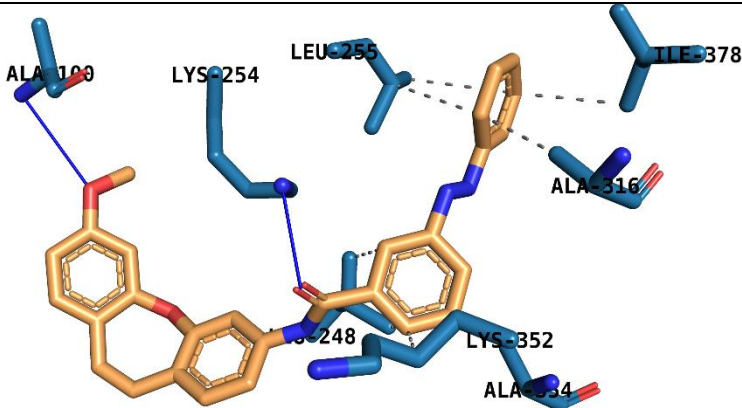   | Hydrophobic Interactions | Leu248<br>Leu255<br>Ala316<br>Lys352<br>Ala354<br>Ile378                    |
|            |                                                                                      | Hydrogen Bonds           | Ala100<br>Lys254                                                            |
| <b>5eZ</b> |   | Hydrophobic Interactions | Ala99<br>Thr145<br>Leu248<br>Ala250<br>Lys254<br>Leu255<br>Ala316<br>Lys352 |
|            |                                                                                      | Hydrogen Bonds           | Asn101<br>Asn249<br>Lys254                                                  |
| <b>5fE</b> |  | Hydrophobic Interactions | Leu248<br>Leu255<br>Ala316<br>Lys352<br>Ile378                              |
|            |                                                                                      | Hydrogen Bonds           | Ala100<br>Lys254<br>Lys352                                                  |

|            |                                                                                      |                          |                                                                    |
|------------|--------------------------------------------------------------------------------------|--------------------------|--------------------------------------------------------------------|
|            |                                                                                      | Halogen Bonds            | Tyr202                                                             |
| <b>5fZ</b> | 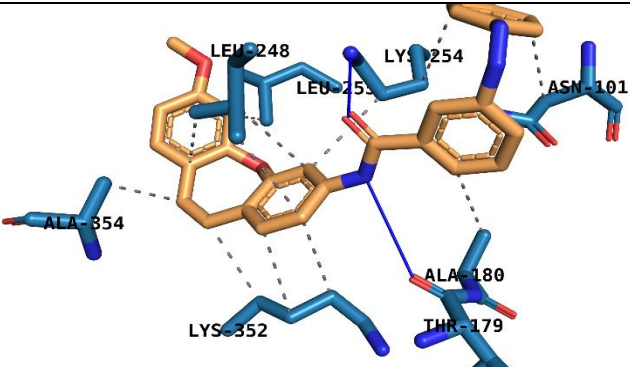   | Hydrophobic Interactions | Asn101<br>Ala180<br>Leu248<br>Lys254<br>Leu255<br>Ala354           |
|            |                                                                                      | Hydrogen Bonds           | Thr179<br>Lys254                                                   |
| <b>5gE</b> |    | Hydrophobic Interactions | Val181<br>Leu248<br>Lys254<br>Leu255<br>Asn258<br>Ala316<br>Lys353 |
|            |                                                                                      | Hydrogen Bonds           | Asn101                                                             |
| <b>5gZ</b> |  | Hydrophobic Interactions | Asn101<br>Leu248<br>Lys254<br>Leu255<br>Val318<br>Lys352<br>Ala354 |
|            |                                                                                      | Hydrogen Bonds           | Thr179<br>Lys254                                                   |

|            |                                                                                     |                            |                                                                    |
|------------|-------------------------------------------------------------------------------------|----------------------------|--------------------------------------------------------------------|
| <b>5hE</b> | 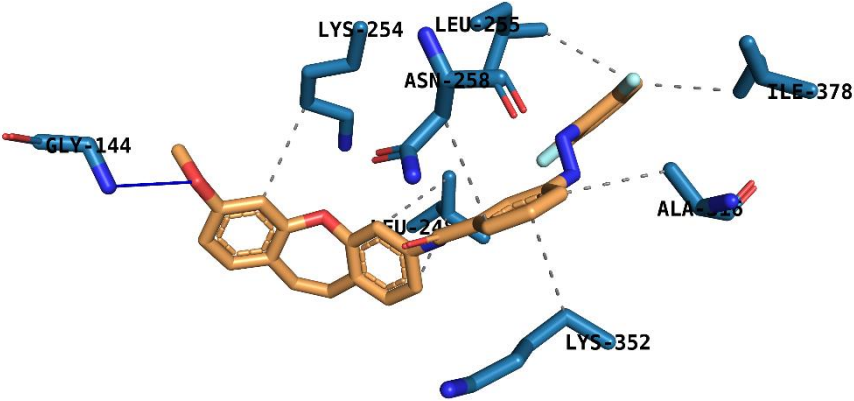  | Hydrophobic Interactions   | Leu248<br>Lys254<br>Leu255<br>Asn258<br>Ala316<br>Lys352<br>Ile378 |
|            |                                                                                     | Hydrogen Bonds             | Gly144                                                             |
| <b>5hZ</b> |  | Hydrophobic Interactions   | Asn101<br>Ala180<br>Leu248<br>Leu255<br>Lys252                     |
|            |                                                                                     | Hydrogen Bonds             | Asn101<br>Lys352                                                   |
|            |                                                                                     | $\pi$ -Cation Interactions | Lys352                                                             |

Table 3S. Estimated binding energy (kJ/mol) to tubulin of (4a-4h) and (5a-5h) isomers *E* and *Z*.

| compound<br>d | affinity<br>[kJ/mol] | $\Delta$ aff ( <i>E</i> -<br><i>Z</i> )<br>[kJ/mol] | compound    | affinity<br>[kJ/mol] | $\Delta$ aff ( <i>E</i> - <i>Z</i> )<br>[kJ/mol] |
|---------------|----------------------|-----------------------------------------------------|-------------|----------------------|--------------------------------------------------|
| 4a <i>E</i>   | -45.6                | 0                                                   | 5a <i>E</i> | -51.9                | -2.5                                             |
| 4a <i>Z</i>   | -45.6                |                                                     | 5a <i>Z</i> | -49.4                |                                                  |
| 4b <i>E</i>   | -47.3                | 3.8                                                 | 5b <i>E</i> | -53.2                | -0.4                                             |
| 4b <i>Z</i>   | -51.1                |                                                     | 5b <i>Z</i> | -52.8                |                                                  |
| 4c <i>E</i>   | -47.3                | 1.7                                                 | 5c <i>E</i> | -49.0                | 4.6                                              |
| 4c <i>Z</i>   | -49.0                |                                                     | 5c <i>Z</i> | -53.6                |                                                  |
| 4d <i>E</i>   | -49.4                | -1.7                                                | 5d <i>E</i> | -52.8                | -2.1                                             |
| 4d <i>Z</i>   | -47.7                |                                                     | 5d <i>Z</i> | -50.7                |                                                  |
| 4e <i>E</i>   | -41.0                | 6.7                                                 | 5e <i>E</i> | -49.8                | -0.8                                             |
| 4e <i>Z</i>   | -47.7                |                                                     | 5e <i>Z</i> | -49.0                |                                                  |
| 4f <i>E</i>   | -43.5                | 8.4                                                 | 5f <i>E</i> | -54.0                | -1.7                                             |
| 4f <i>Z</i>   | -51.9                |                                                     | 5f <i>Z</i> | -52.3                |                                                  |
| 4g <i>E</i>   | -46.5                | 6.3                                                 | 5g <i>E</i> | -51.1                | 1.2                                              |
| 4g <i>Z</i>   | -52.8                |                                                     | 5g <i>Z</i> | -52.3                |                                                  |
| 4h <i>E</i>   | -46.9                | 1.2                                                 | 5h <i>E</i> | -49.8                | 5                                                |
| 4h <i>Z</i>   | -48.1                |                                                     | 5h <i>Z</i> | -54.8                |                                                  |

## 2. Experimental section

### 2.1. Nuclear magnetic resonance (NMR) spectroscopy:

All the spectra were recorded using a Varian VNMRs spectrometer operating at 11.7 T and Varian Mercury VX 9.4 T magnetic field. Measurements were performed for ca. 1.0 M solutions of all the compounds in DMSO- $d_6$  or  $CDCl_3$ . The residual signals of DMSO- $d_6$  (2.54 ppm) and  $CDCl_3$  (7.26 ppm) in  $^1H$  NMR and of the DMSO- $d_6$  signal (40.45 ppm) and of  $CDCl_3$  (77.0 ppm) in  $^{13}C$  NMR spectra were used as the chemical shift references. Spin multiplicities are described as s (singlet), d(doublet), t (triplet), q (quartet), m (multiplet), dd (double doublet). Coupling constants are reported in Hertz. All the proton spectra were recorded using the standard spectrometer software and parameters set: acquisition time 3s, pulse angle  $30^\circ$ . The standard measurement parameter set for  $^{13}C$  NMR spectra was: pulse width 7  $\mu s$  (the  $90^\circ$  pulse width was 12.5  $\mu s$ ), acquisition time 1 s, spectral width 200 ppm, 1000 scans of 32 K data point were accumulated and after zero-filling to 64 K; and the FID signals were subjected to Fourier transformation after applying a 1 Hz line broadening. The  $^1H$ - $^{13}C$ gs-HSQC and  $^1H$ - $^{13}C$ gs-HMBC spectra were also recorded using the standard Varian software.

Measurement of NOE effect-  $^{13}C$  NMR spectra with  $^1H$  WALTZ decoupling. The use during acquisition decoupling - is the continuous wave (cw) irradiation of one of the proton *ortho* of dibenzo [*b*, *f*] oxepine (**4hE**) in the ring closer to the carbonyl group at a single decoupling frequency and observation effect on  $^{13}C$  spectrum. And next measurement of the spectrum without irradiation of proton (d1=8s, at=1 s) and observation of  $^{13}C$  spectrum.

In order to determine the *E* / *Z* isomer ratio of **5h**,  $^1H$  NMR spectra were recorded after the NMR tube was irradiated with light with a wavelength  $\lambda = 525$  for 10 min and 60 min.

**2.2. Mass spectrometry (MS):** Mass spectra were recorded on spectrometer QTOF Premier firm Waters and spectrometer LTQ Orbitrap Velos.

**2.3. Photoisomerization studies by UV-VIS spectroscopy:** EnSpire® multimode plate reader (PerkinElmer, Turku, Finland) with the software EnSpire Workstation version 4.10.3005.1440 (PerkinElmer) in absorbance mode was used for UV-VIS spectroscopic measurements. All experiments were done in at least triplicate. Stock solutions of selected compounds were made in DMSO at appropriate concentrations and stirred at  $150^\circ C$  overnight to ensure complete relaxation of *E* – isomer. Next 100  $\mu L$  of stock solution was transferred to 96 – a well plate as quickly as possible and absorbance was read. Afterward, samples were illuminated with light at  $\lambda = 525$  nm by a self-made LED setup consisting of three high-power 1W LED (ASMT-AG00-NST00) in series. The working setup is presented in Figure 1S. Samples were illuminated with increasing periods until no further spectrum changes were observed.

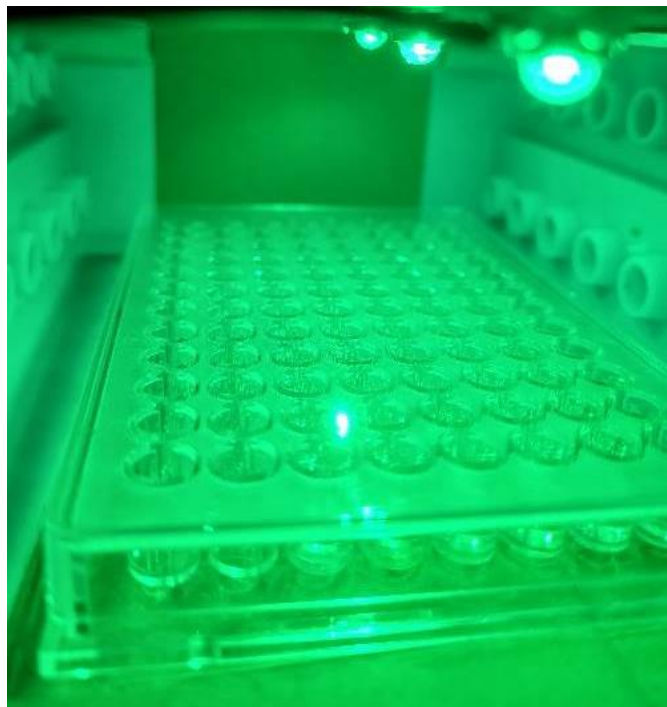

**Figure 1S.** Self-made 3W green LED setup illuminating samples in 96-well plate.

50 $\mu$ M and 500 $\mu$ M solutions in DMSO have been used for photoswitching studies of azobenzene by *UV – vis* spectroscopy [1]  
[1] D. B. Konrad, ,G. Savasci, L. Allmendinger, D. Trauner, C. Ochsenfeld, A. M. AliJ., *Am. Chem. Soc.* 2020, **142**, 6538 – 6547

3. NMR spectra of obtained compounds, yield, time of reaction, melting point, and high resolution mass date.

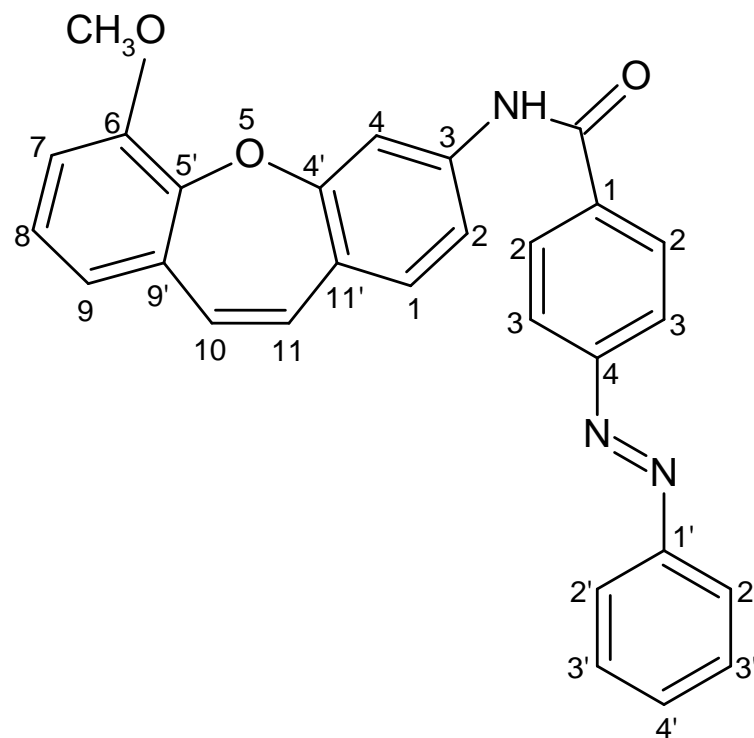

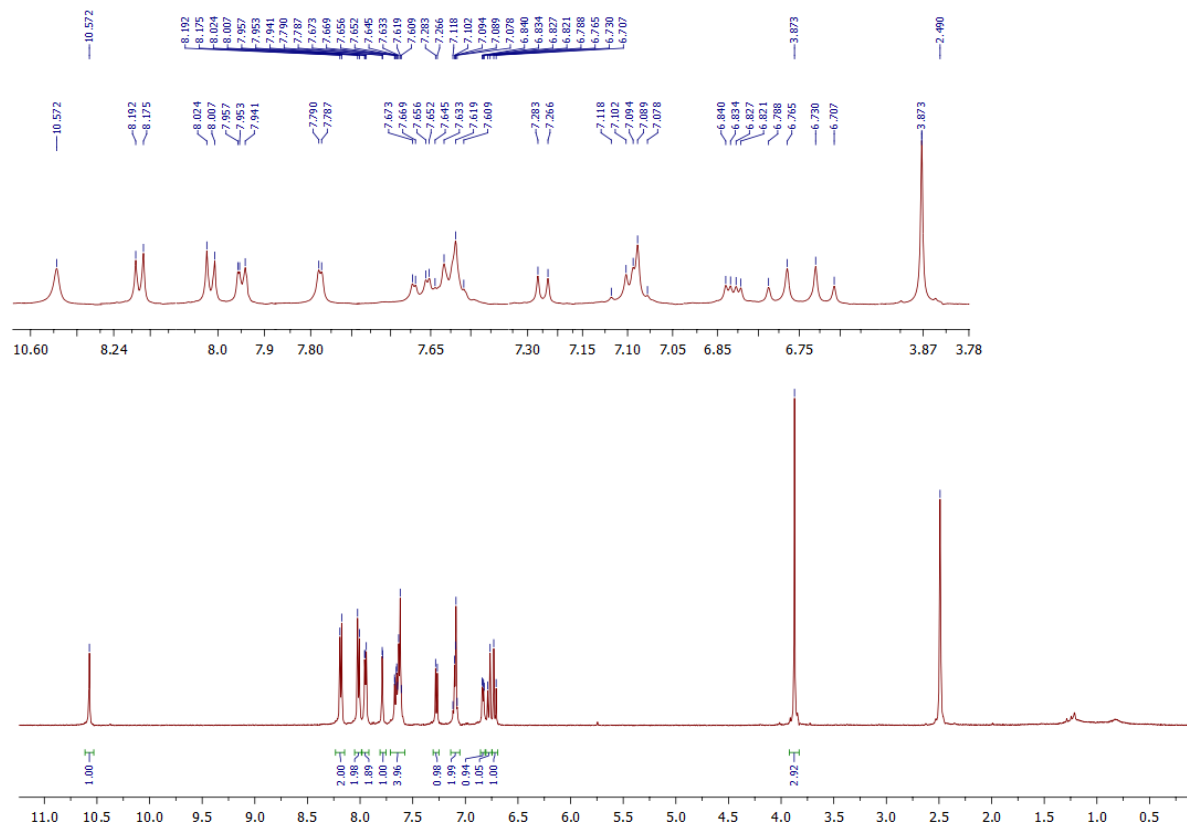

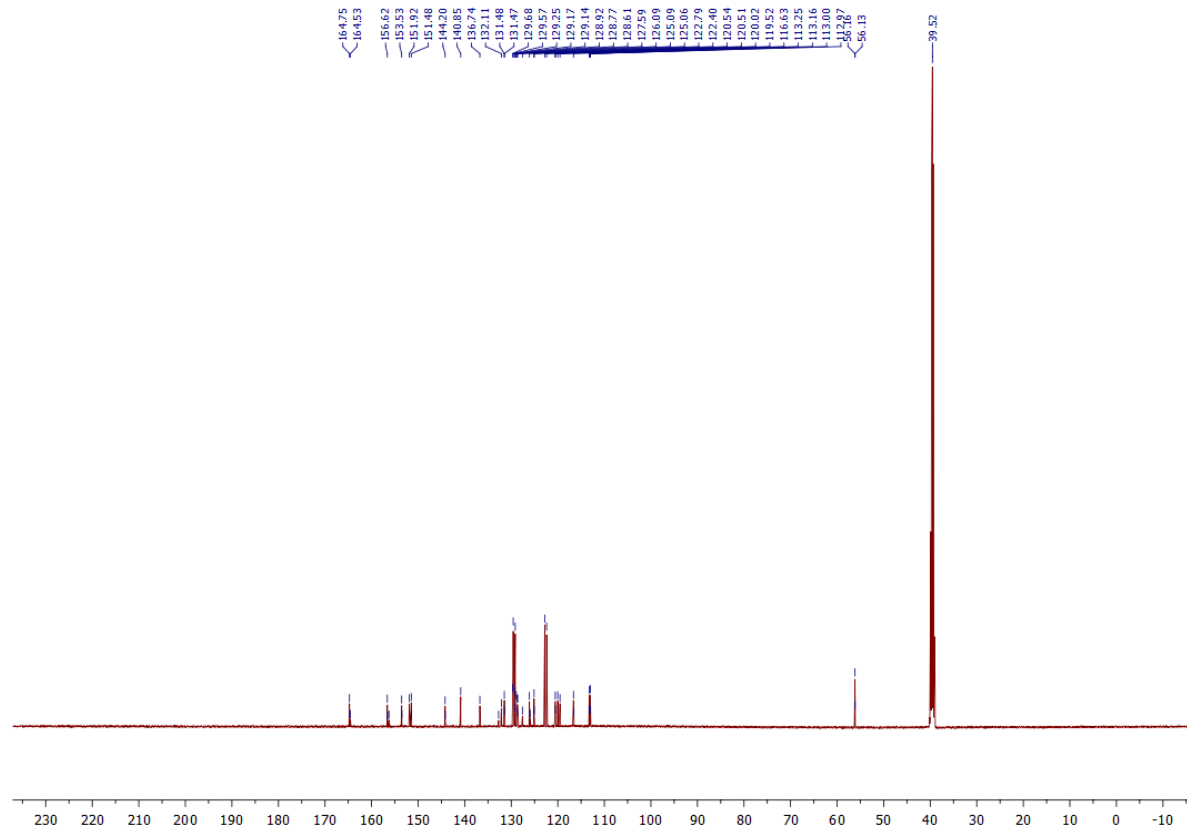

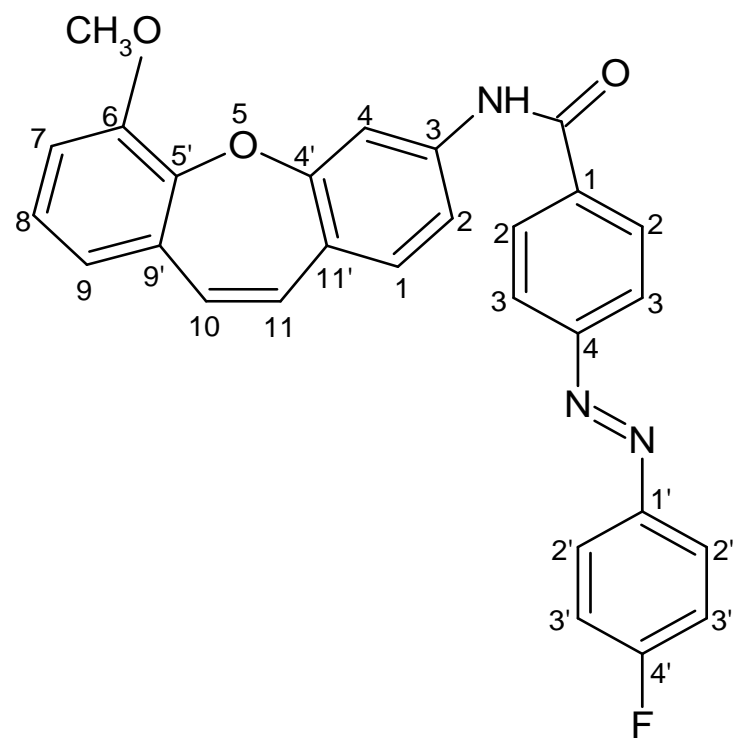

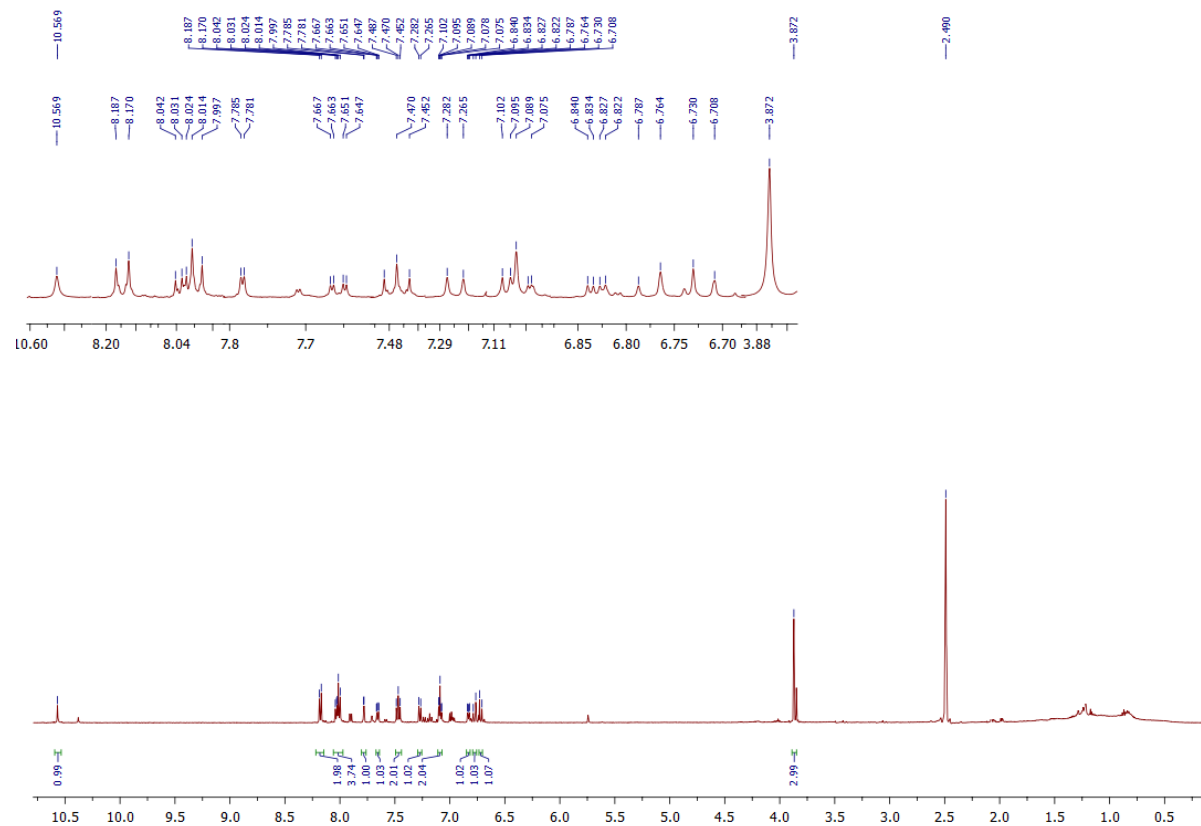

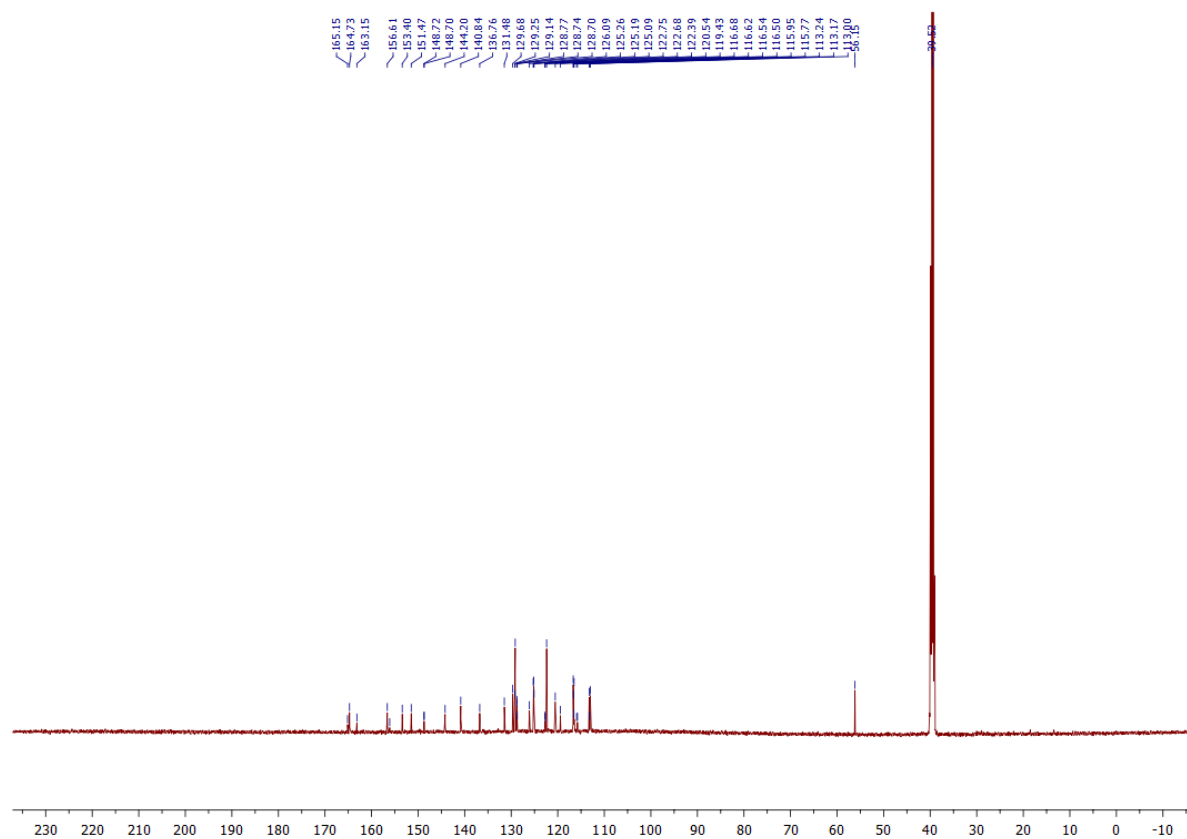

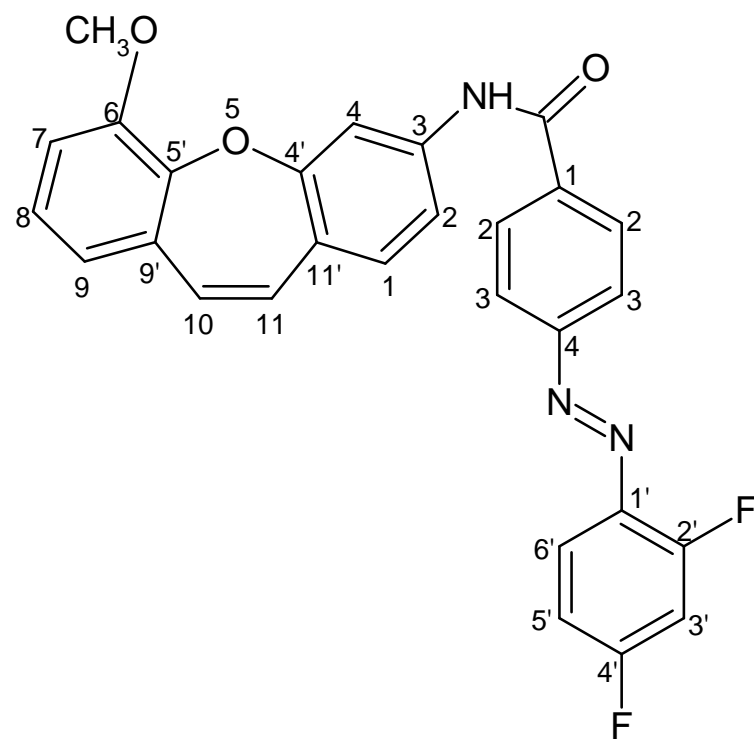

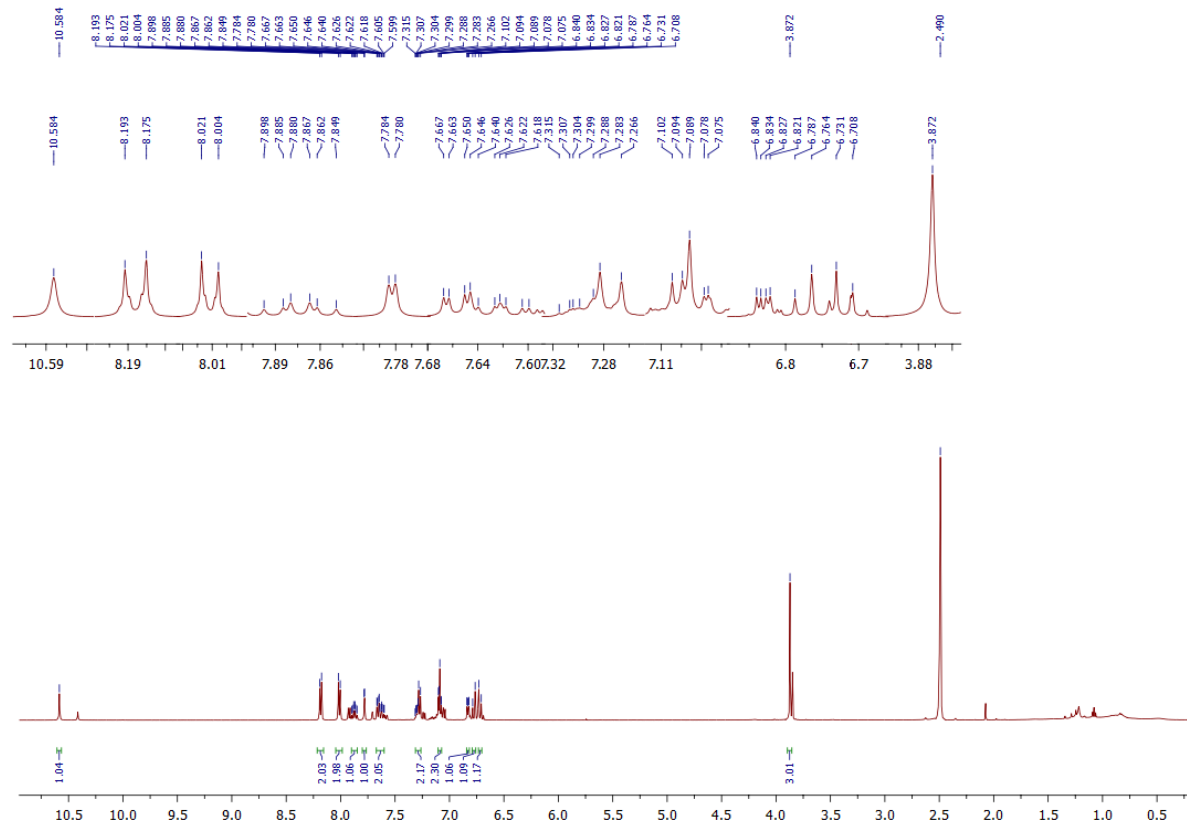

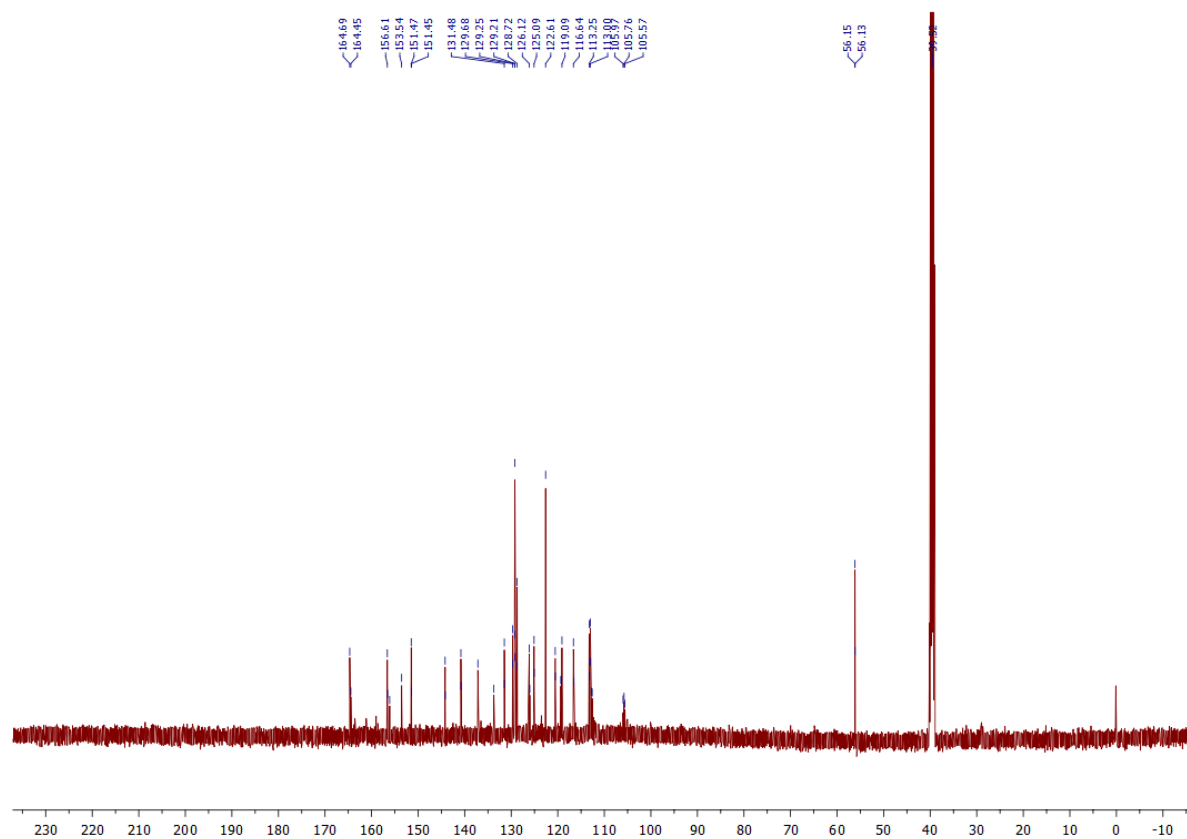

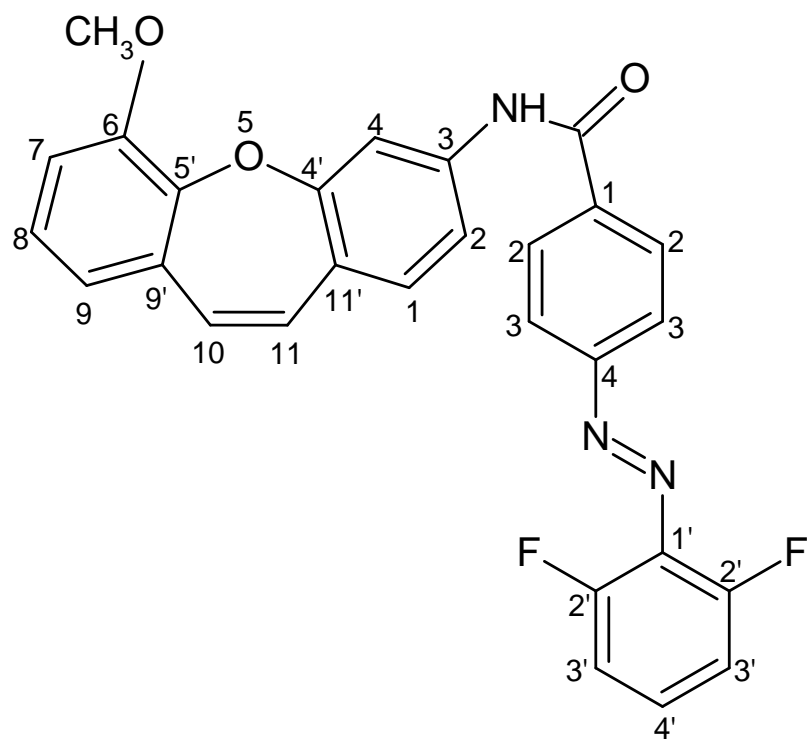

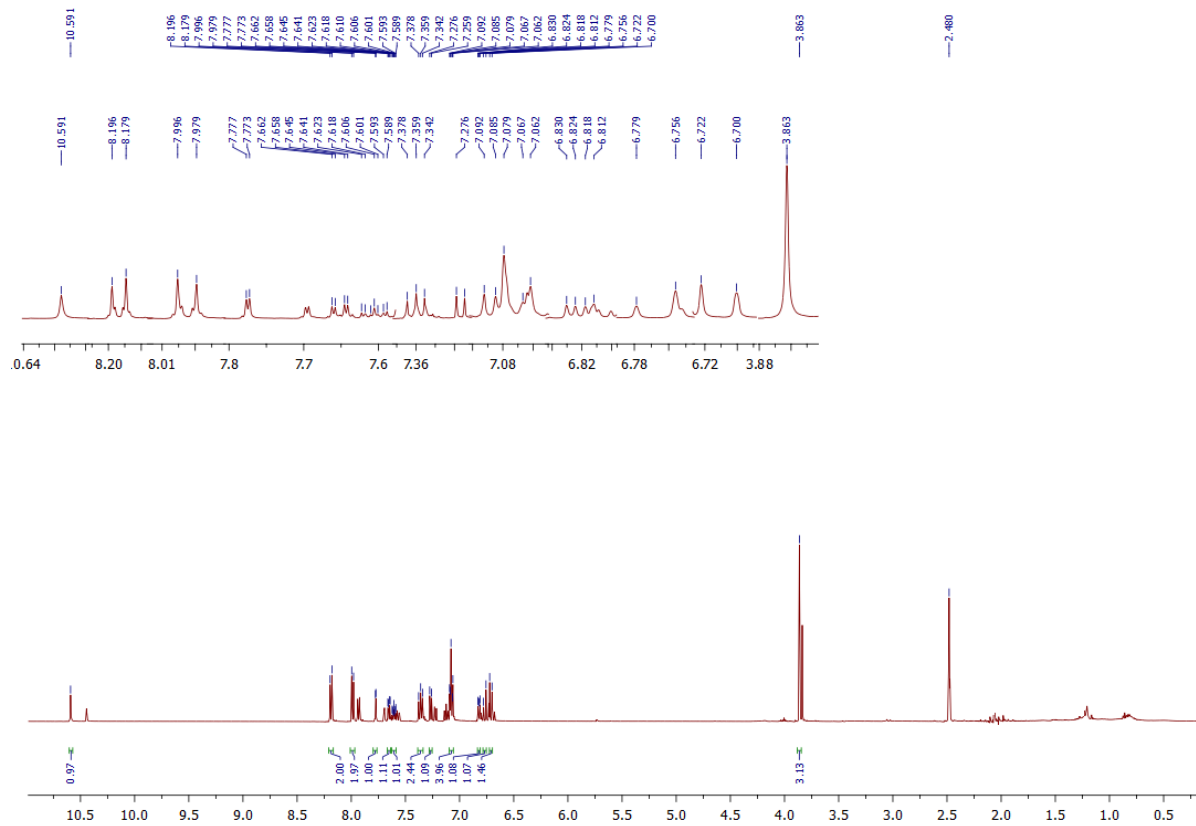

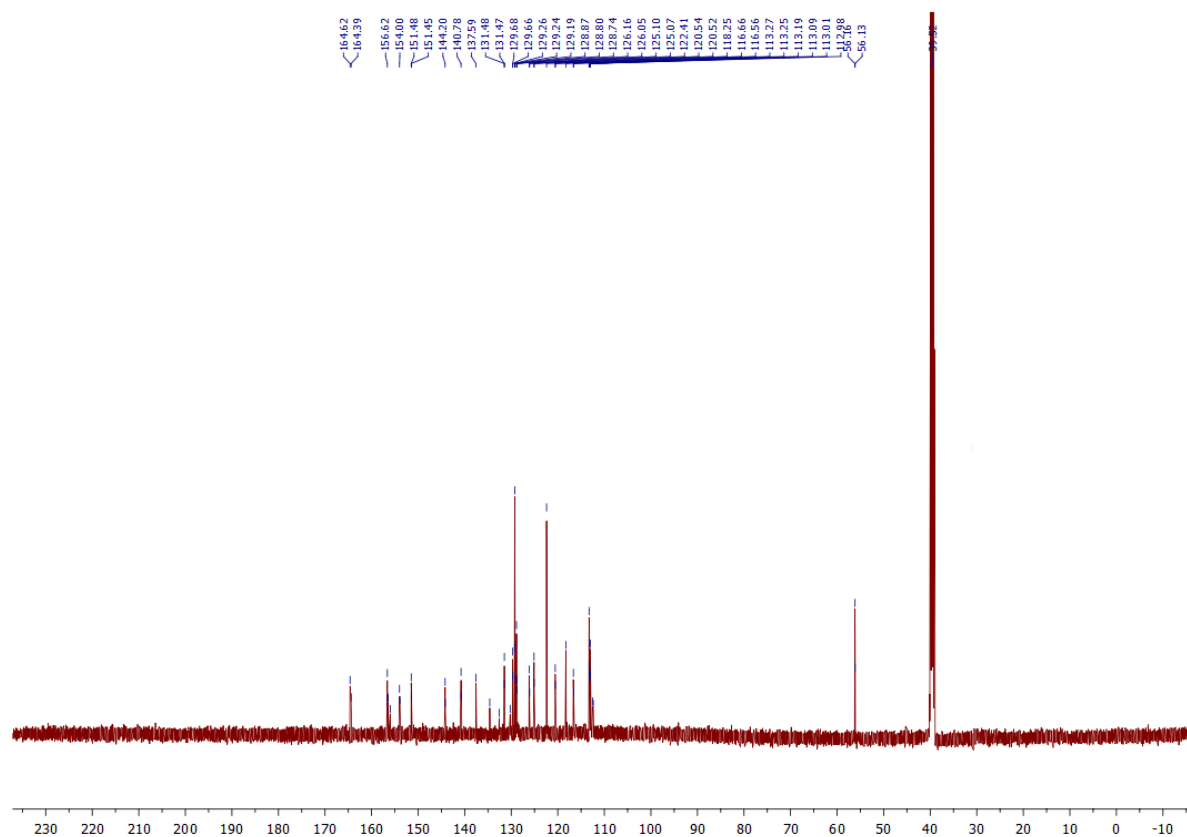

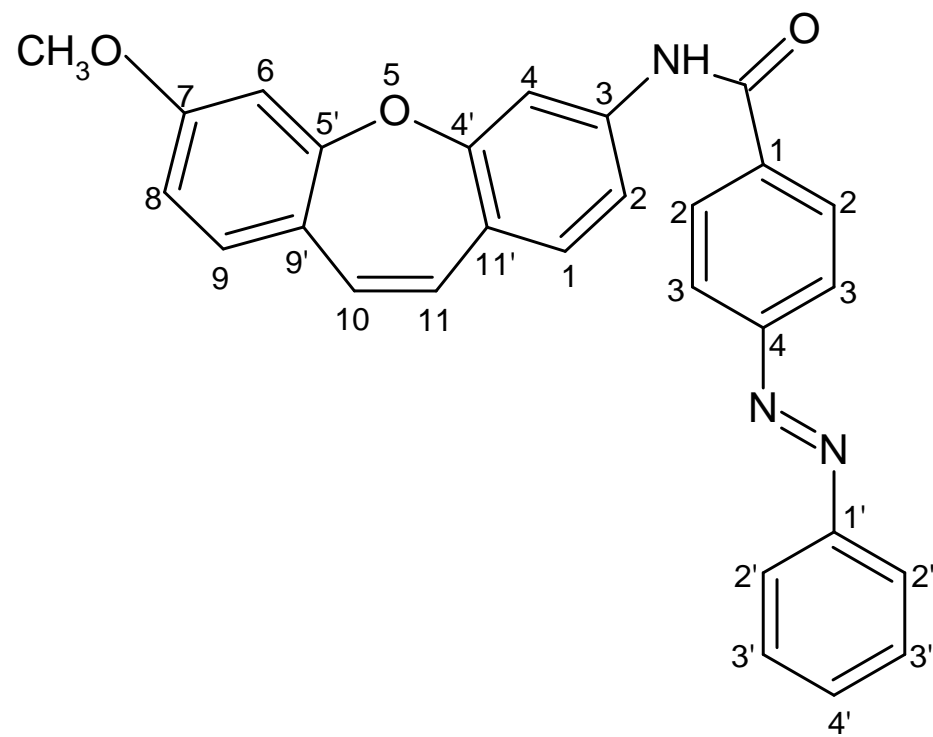

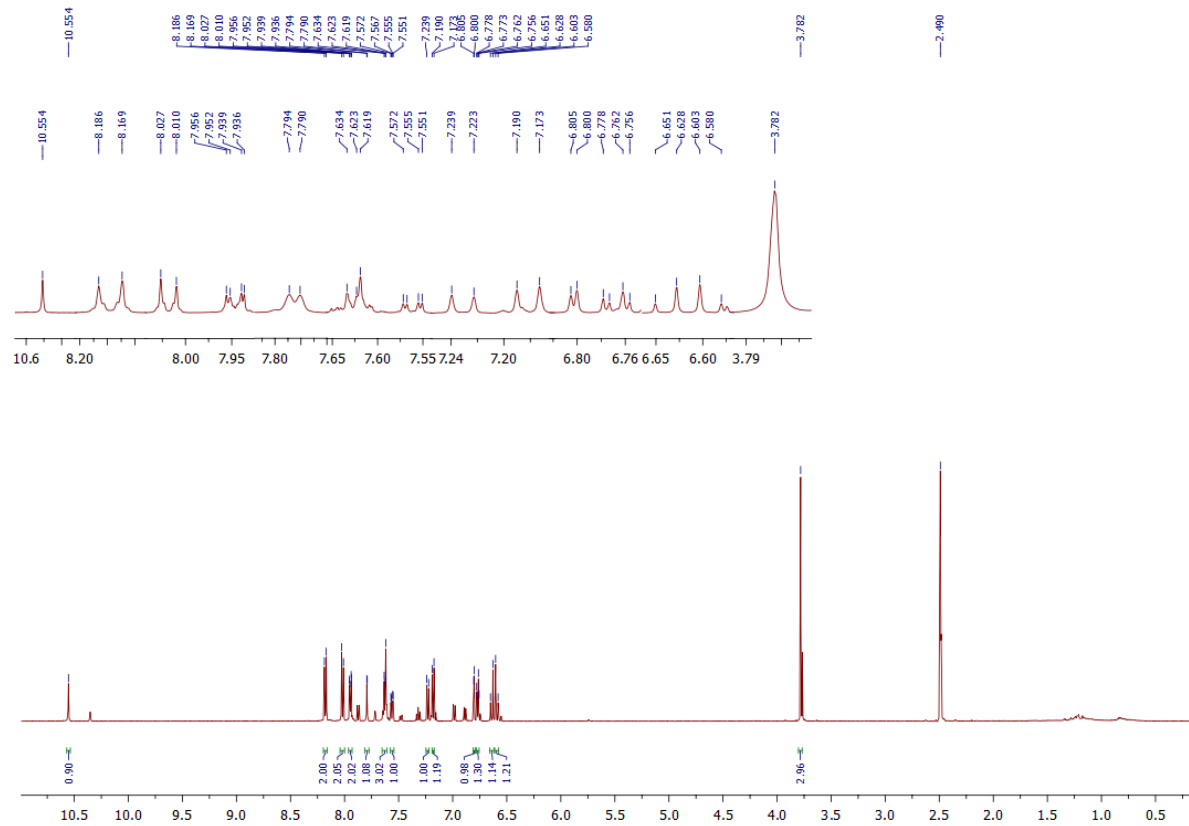

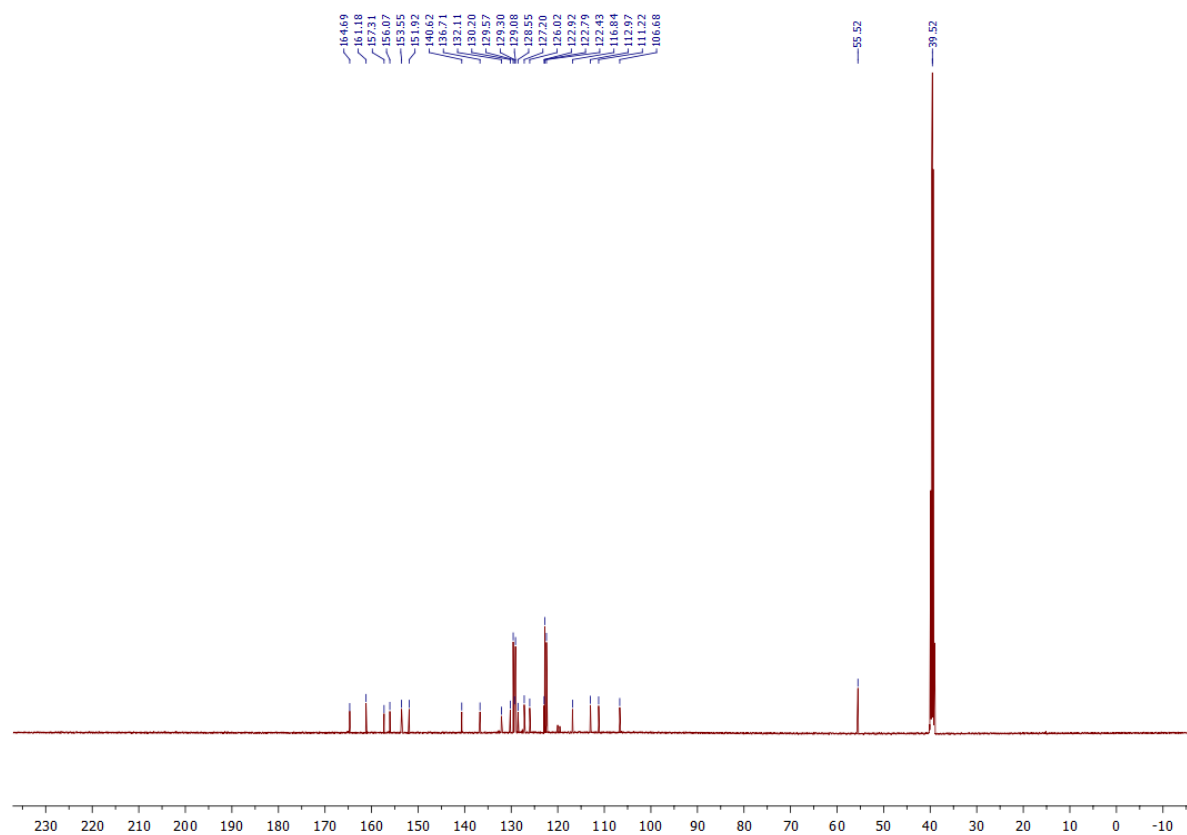

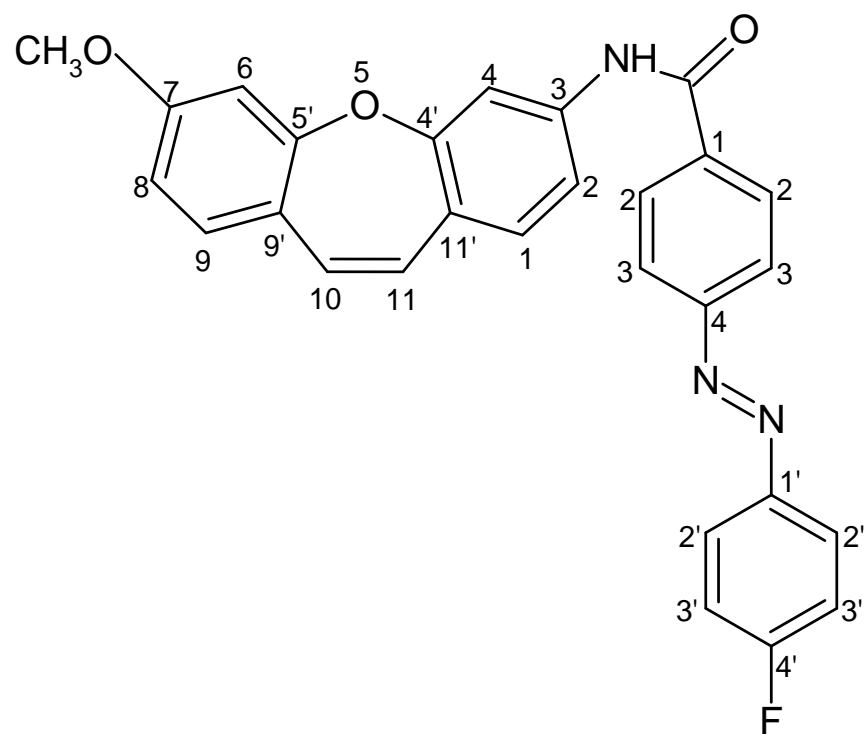

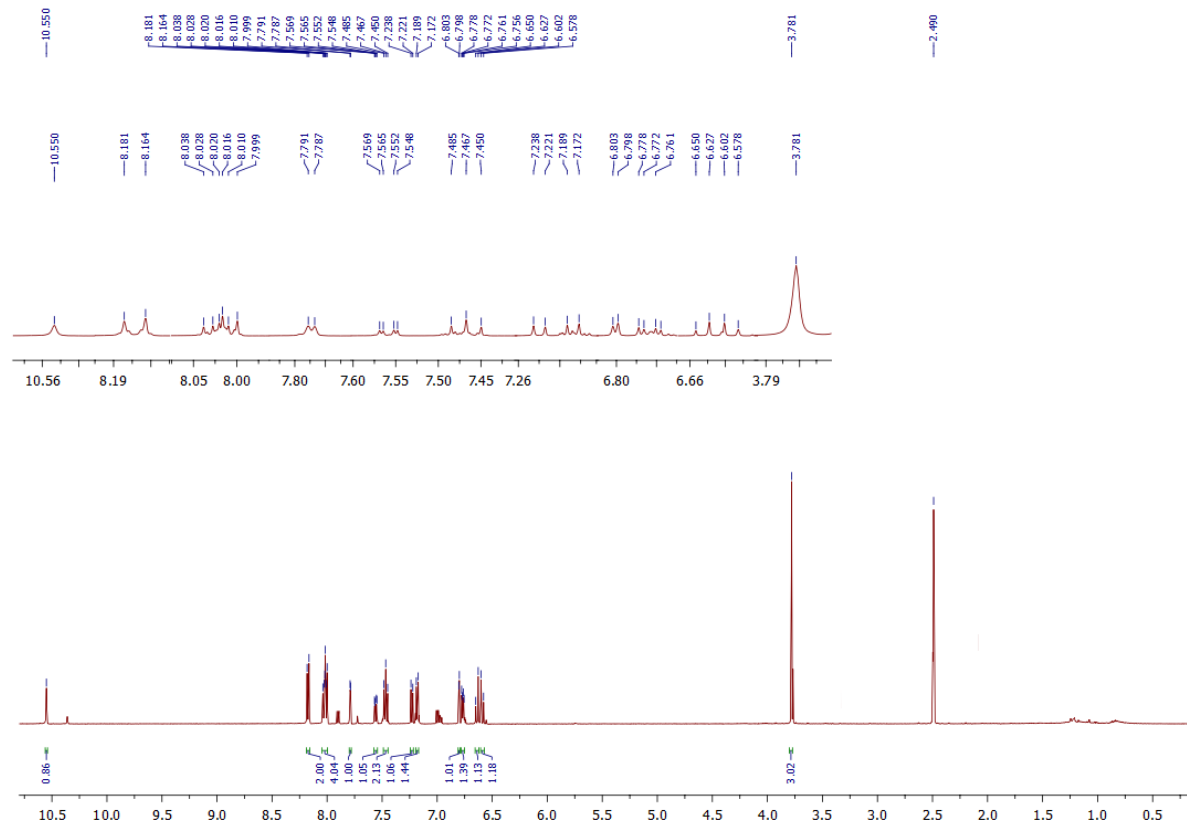

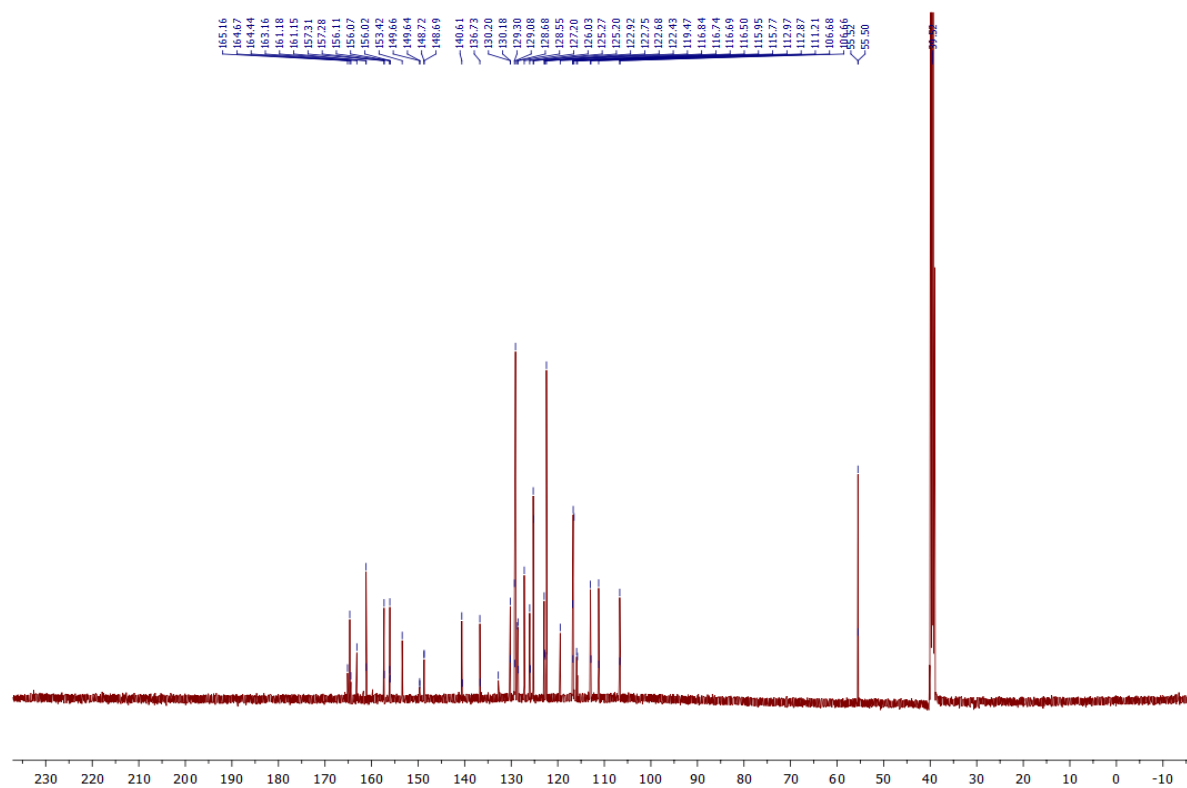

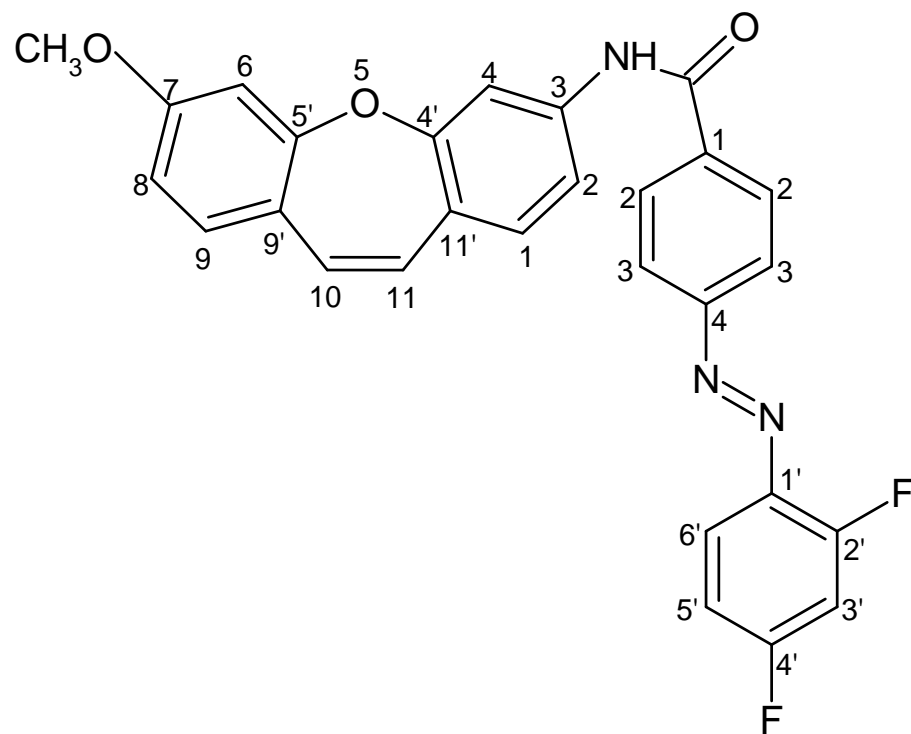

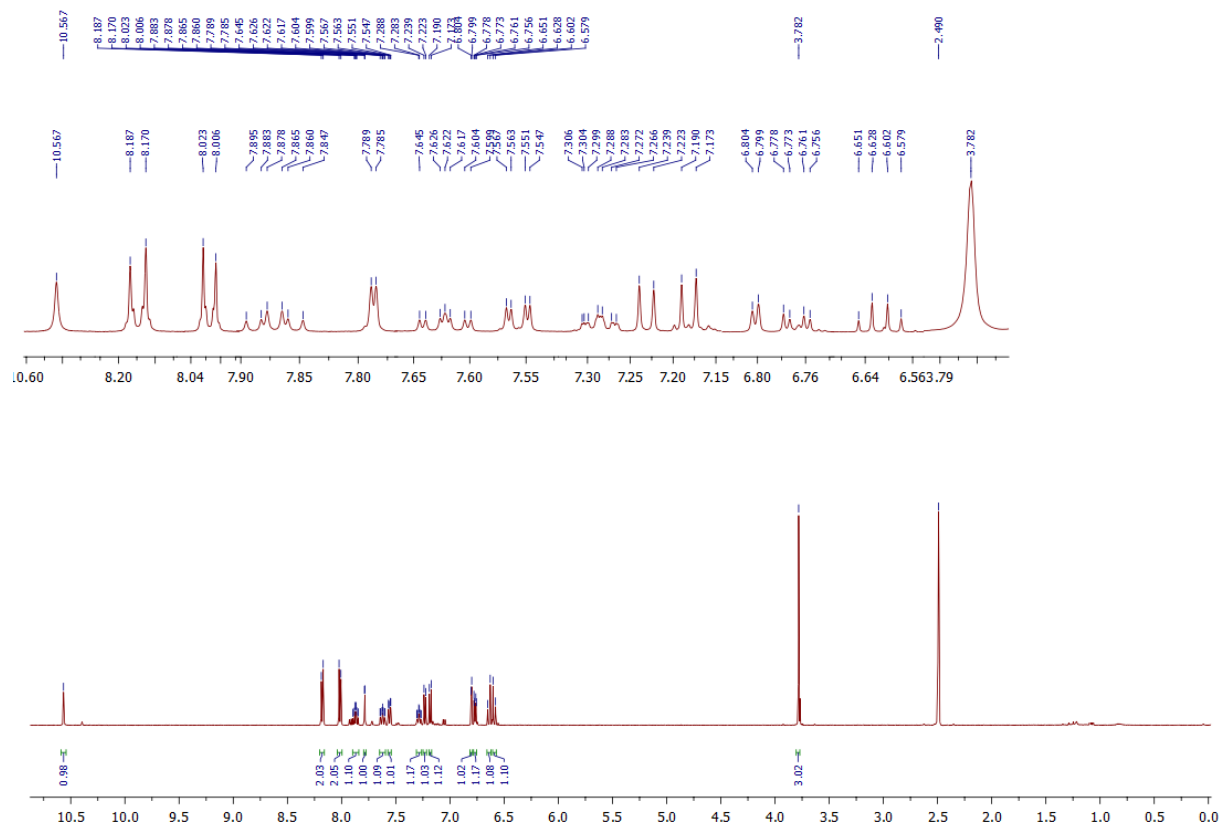

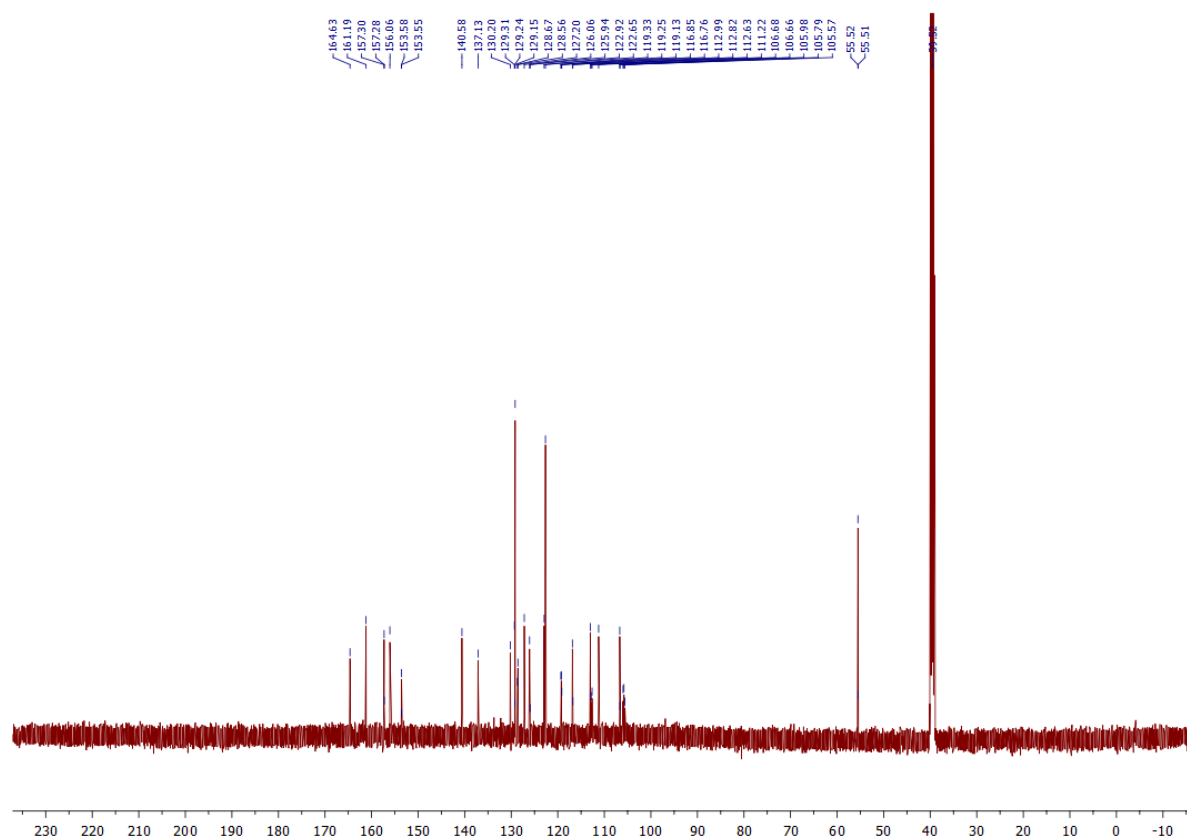

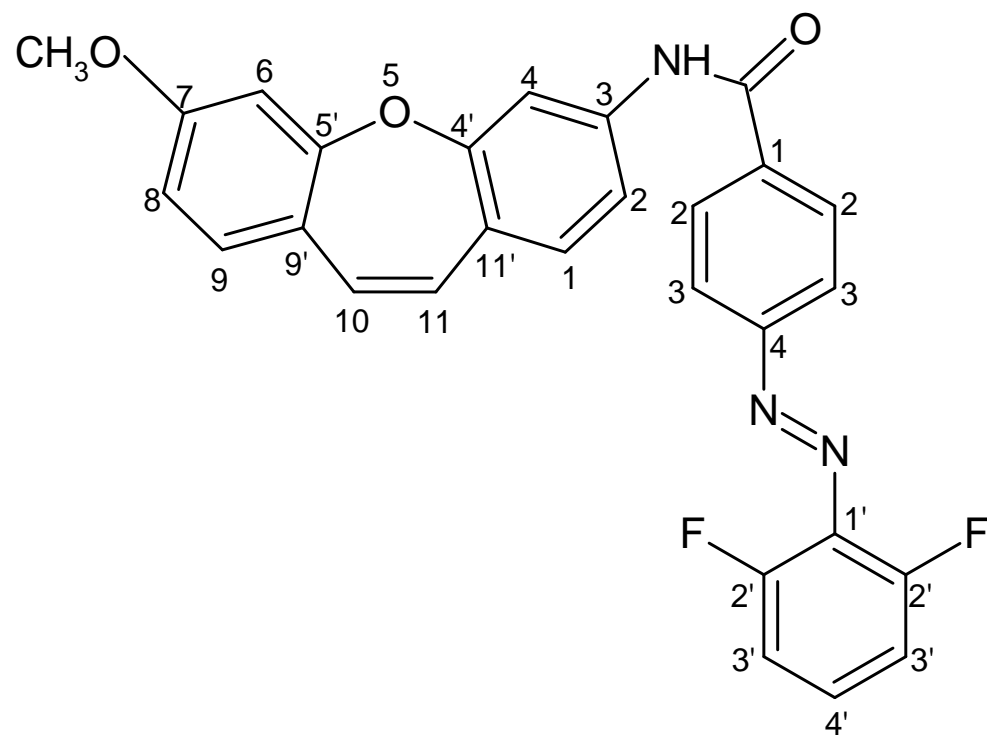

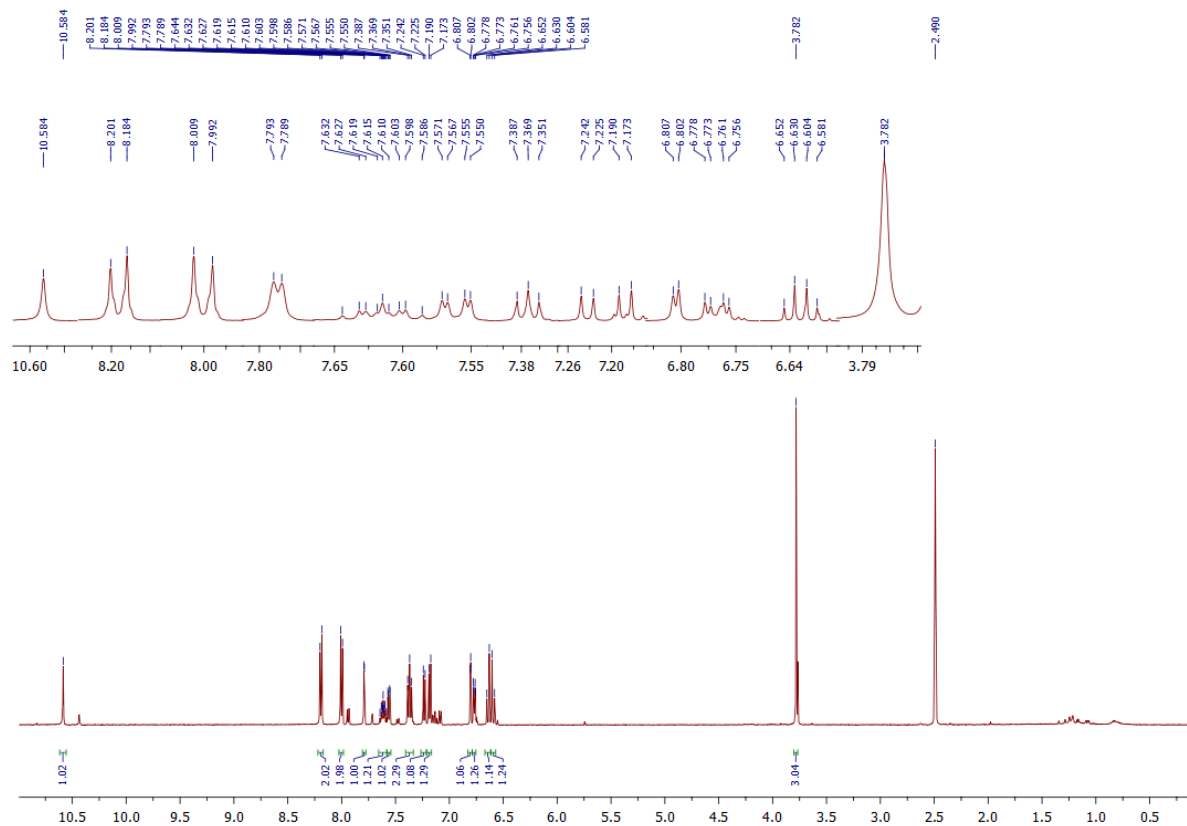

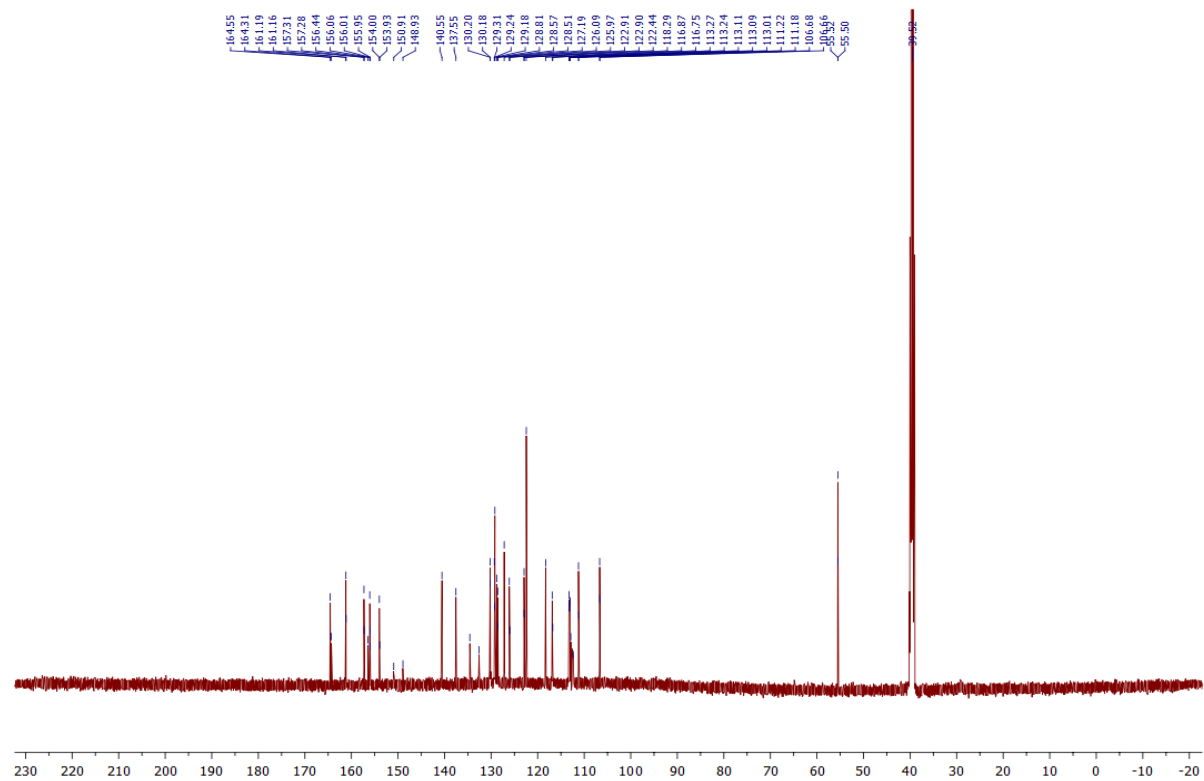

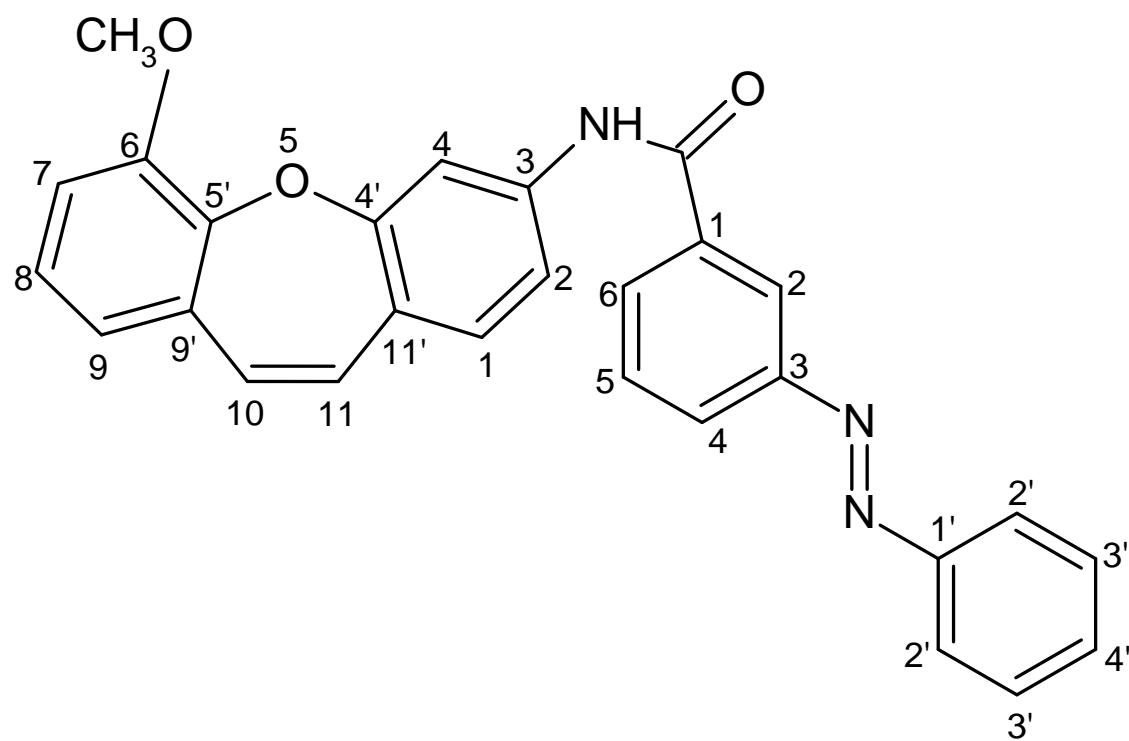

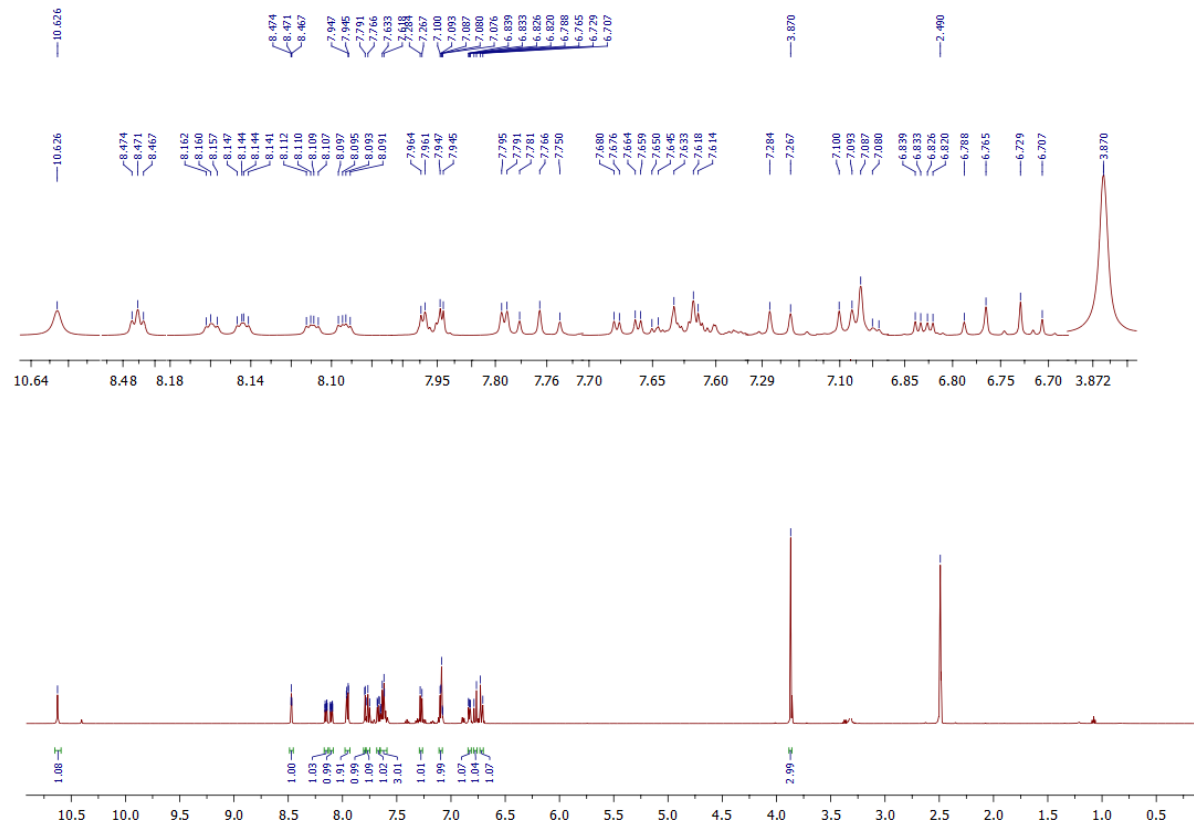

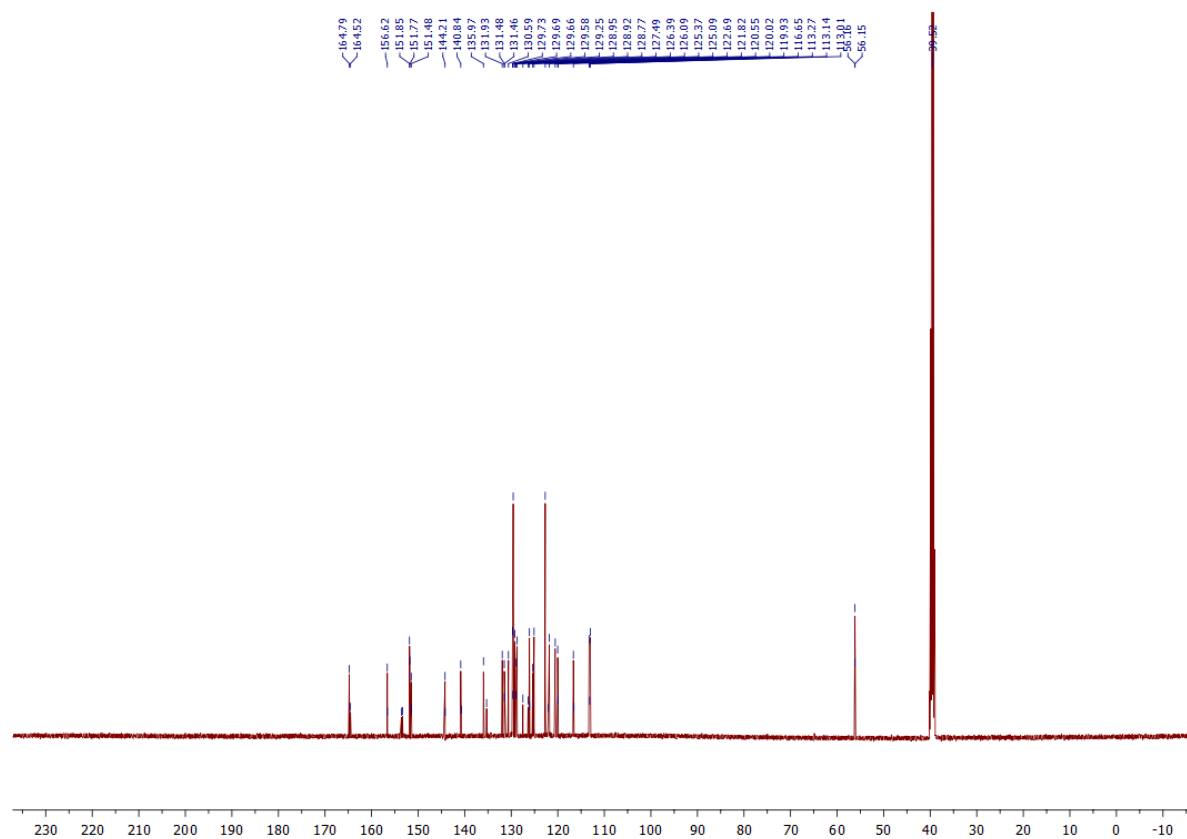

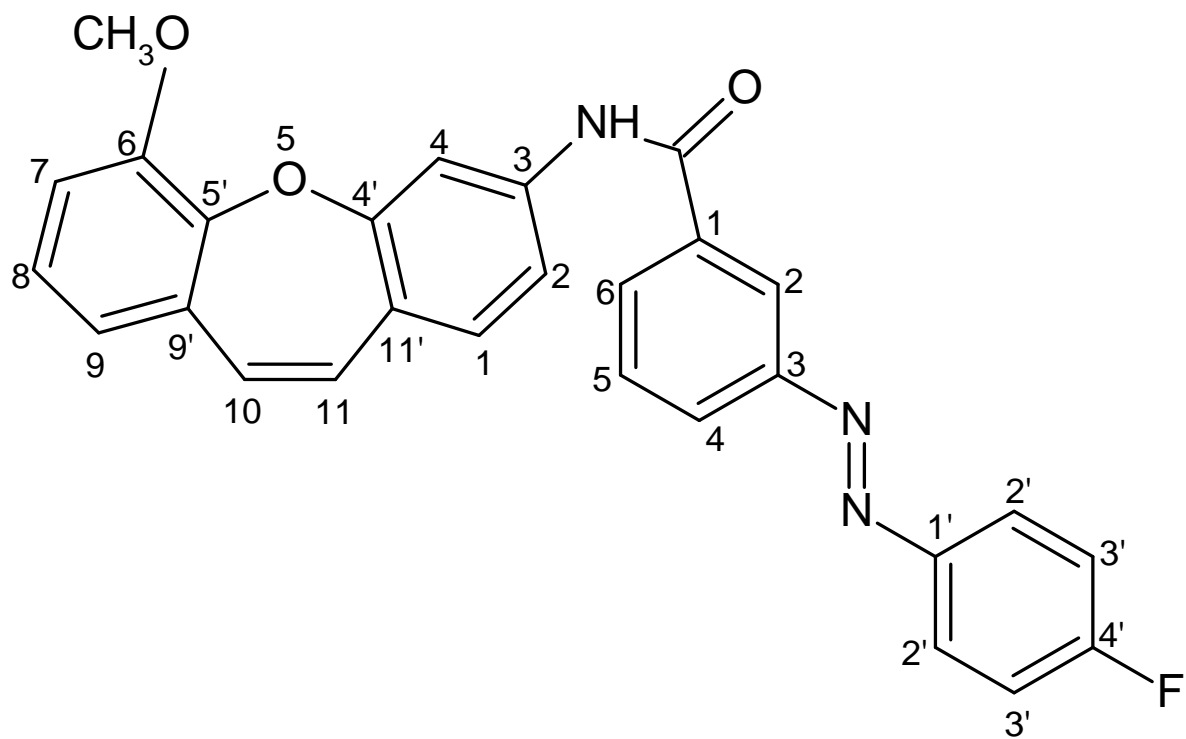

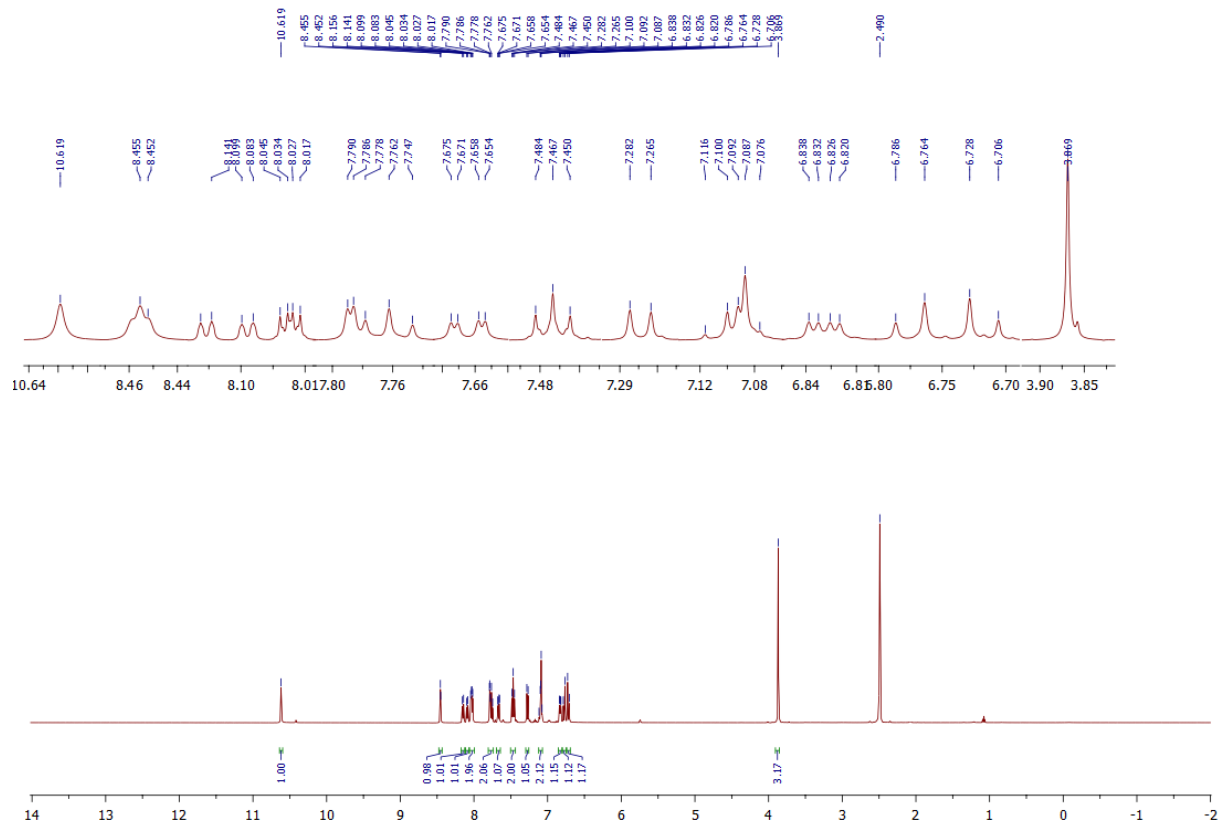

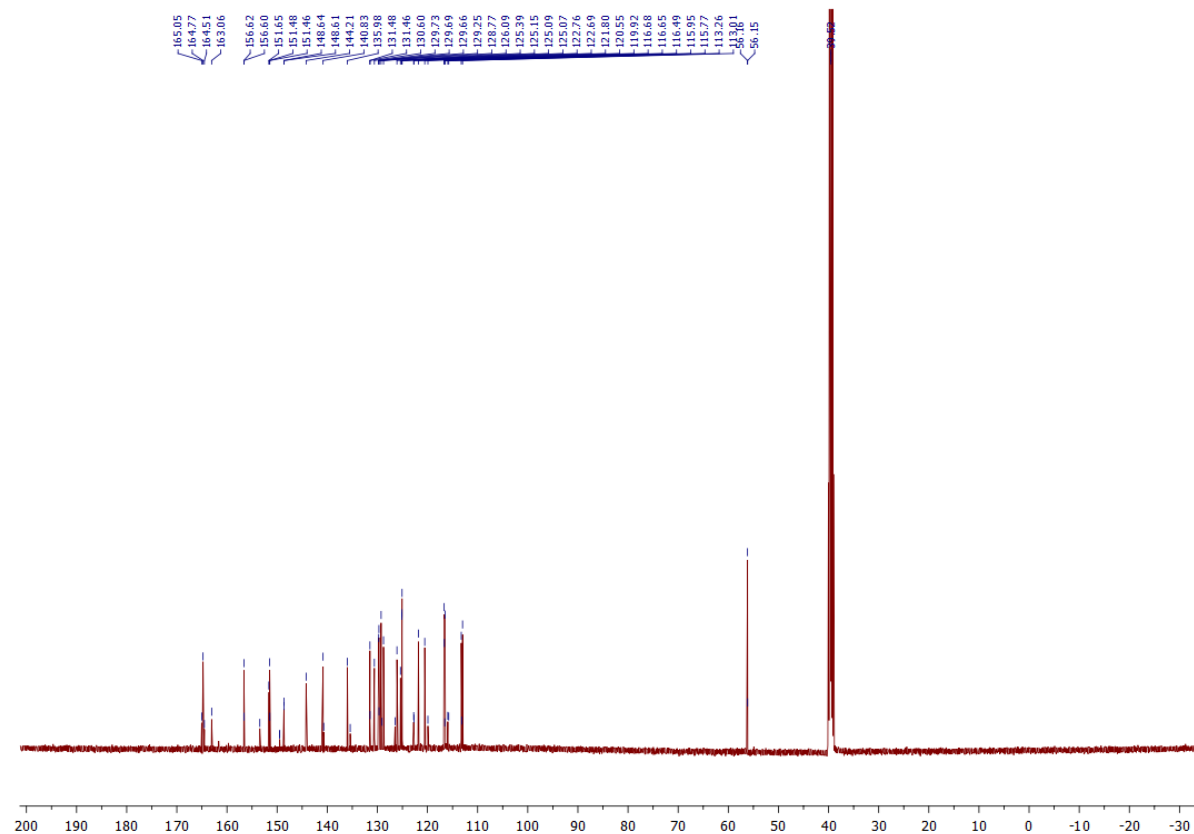

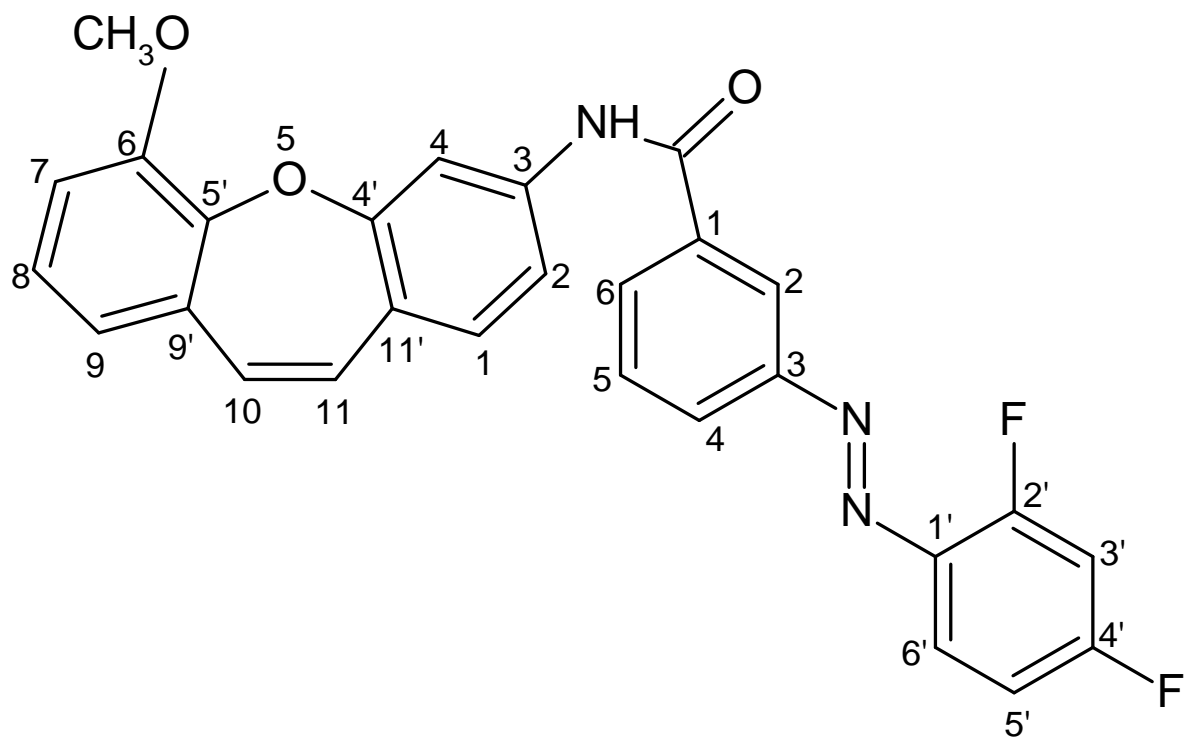

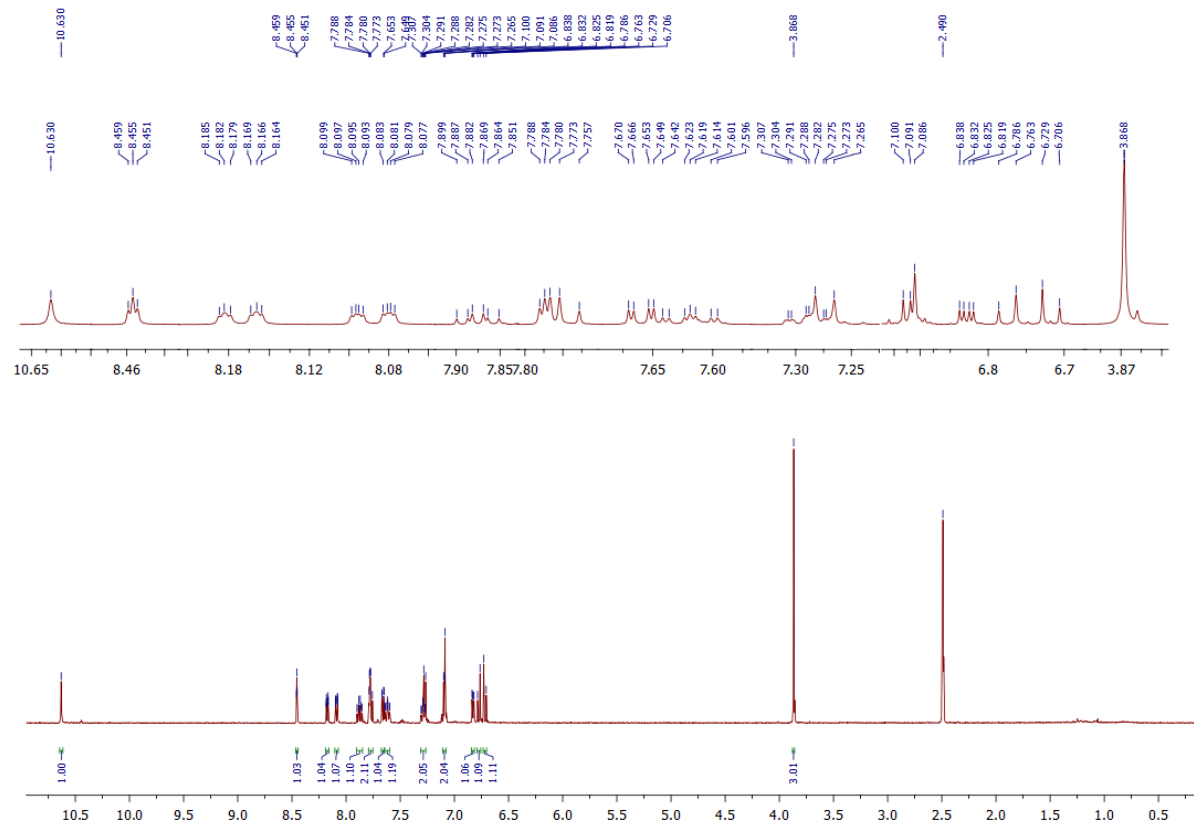

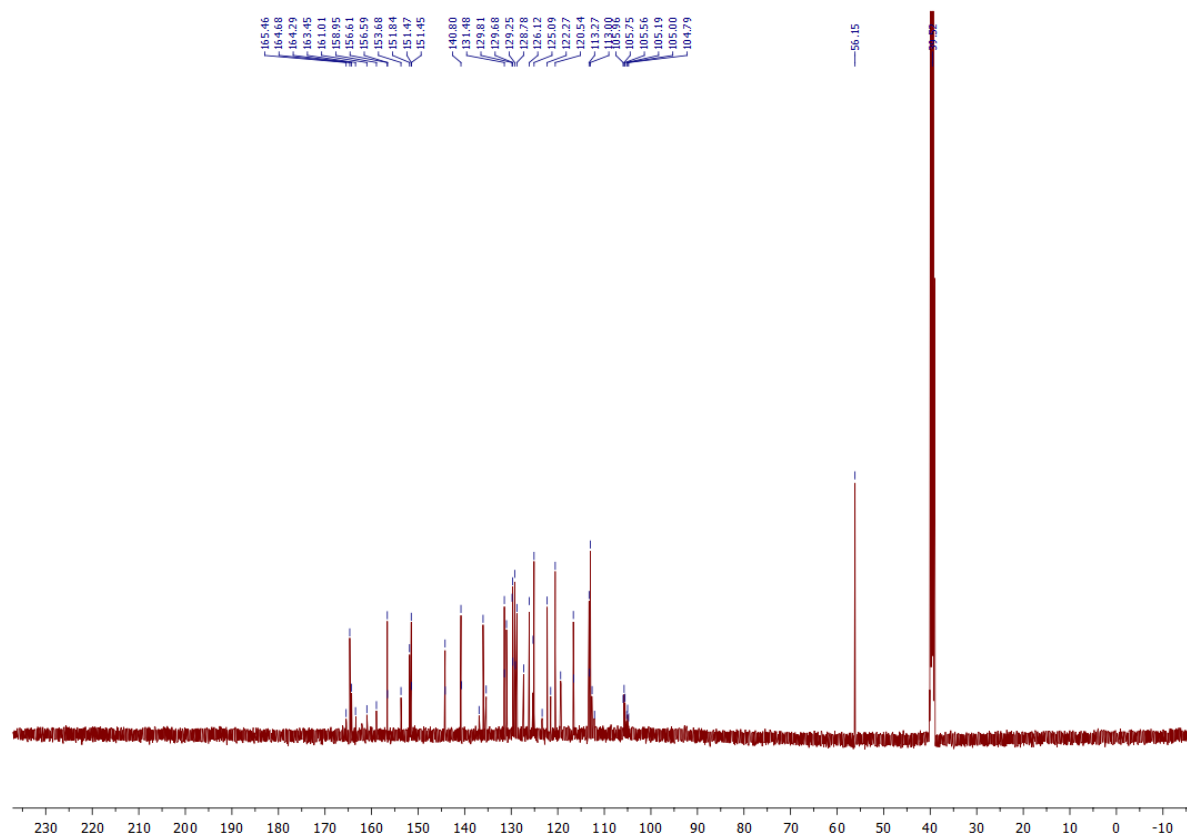

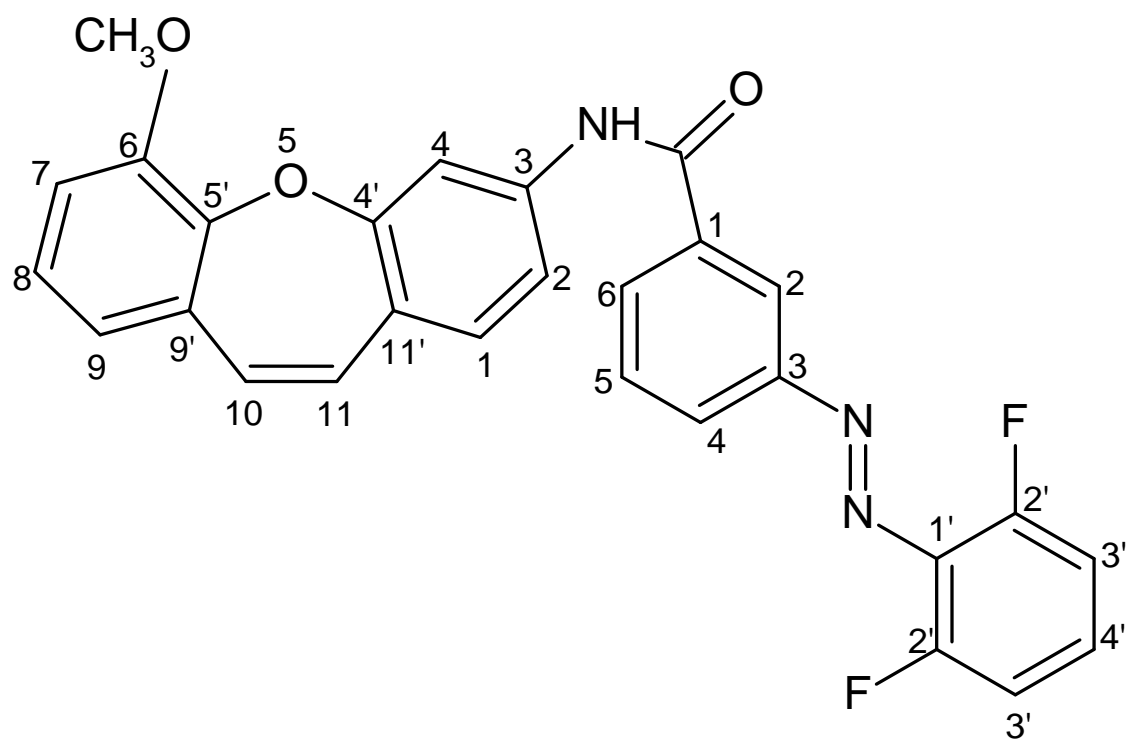

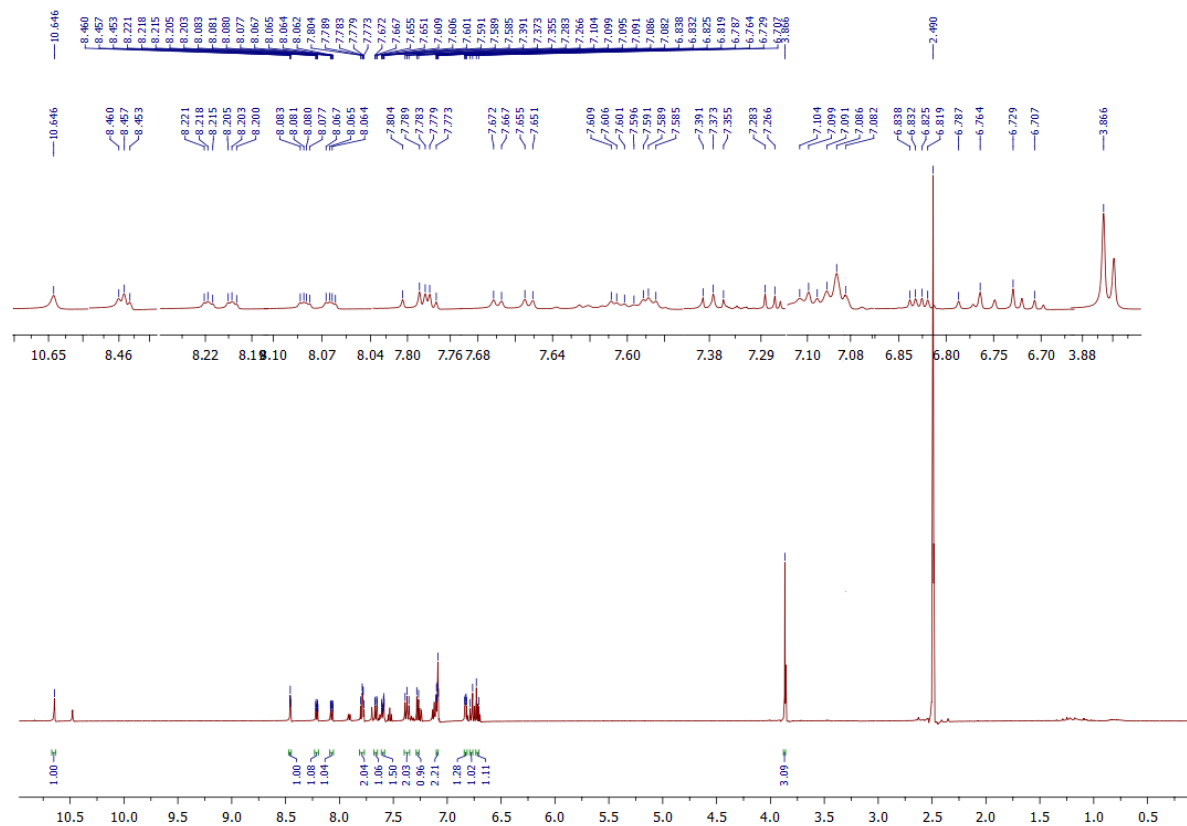

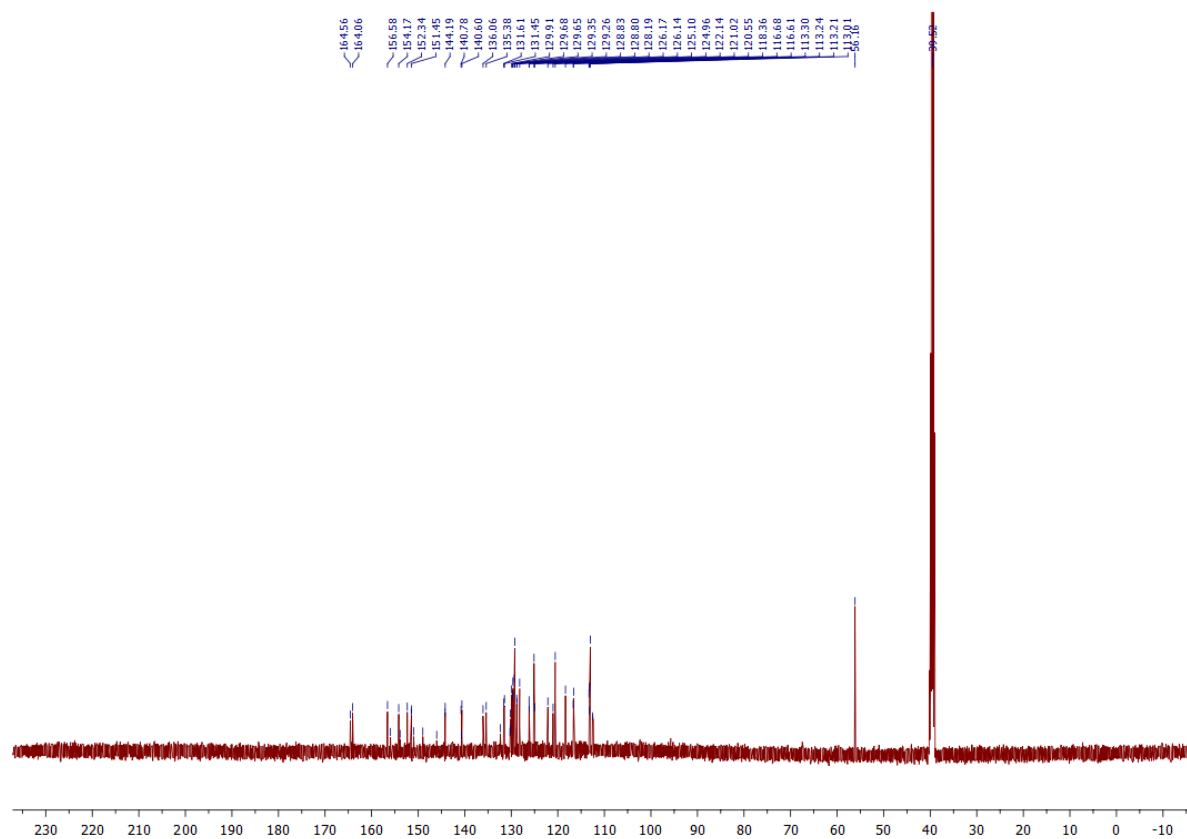

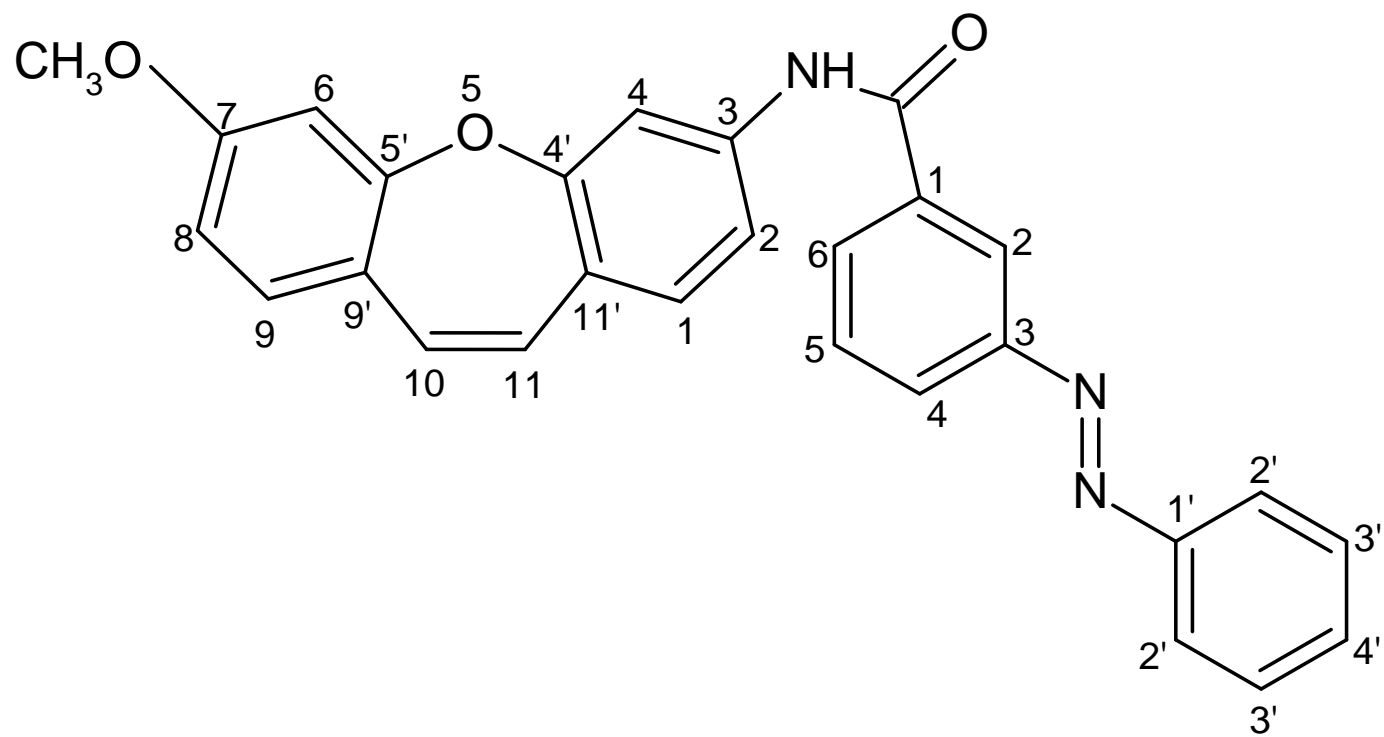

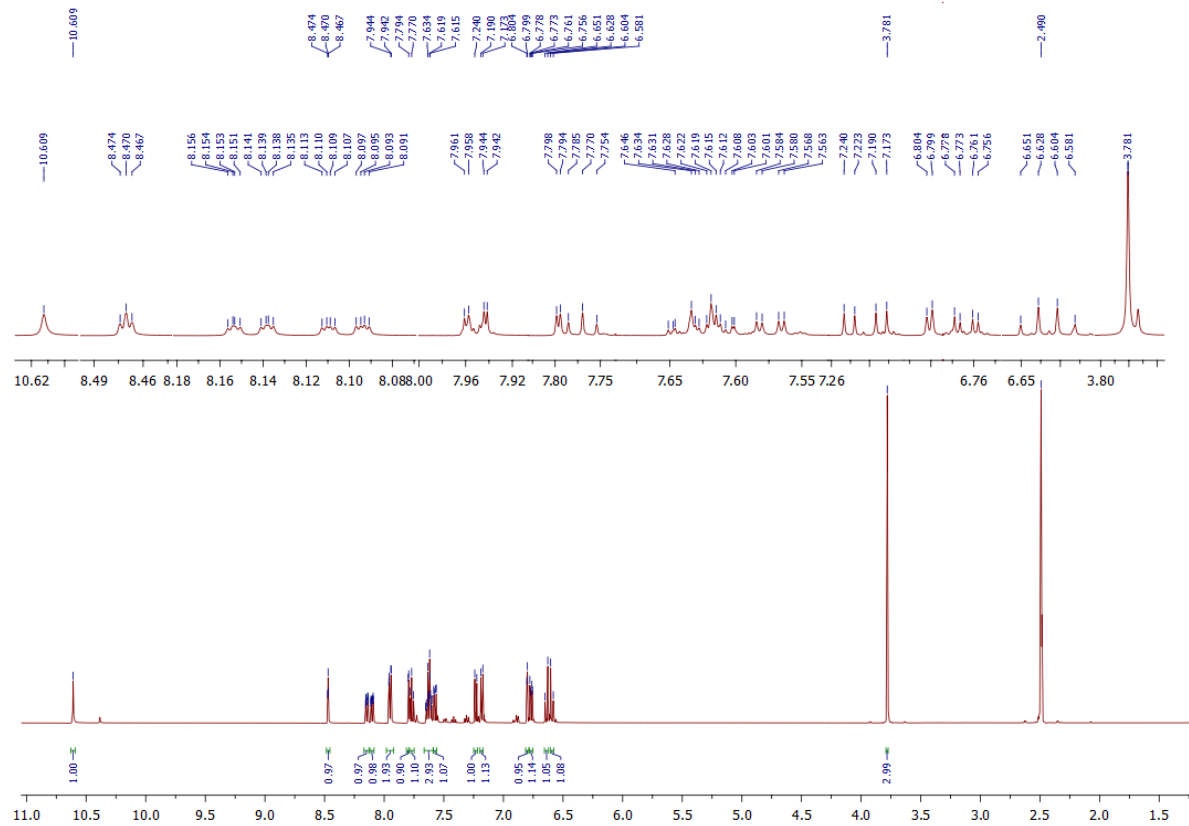

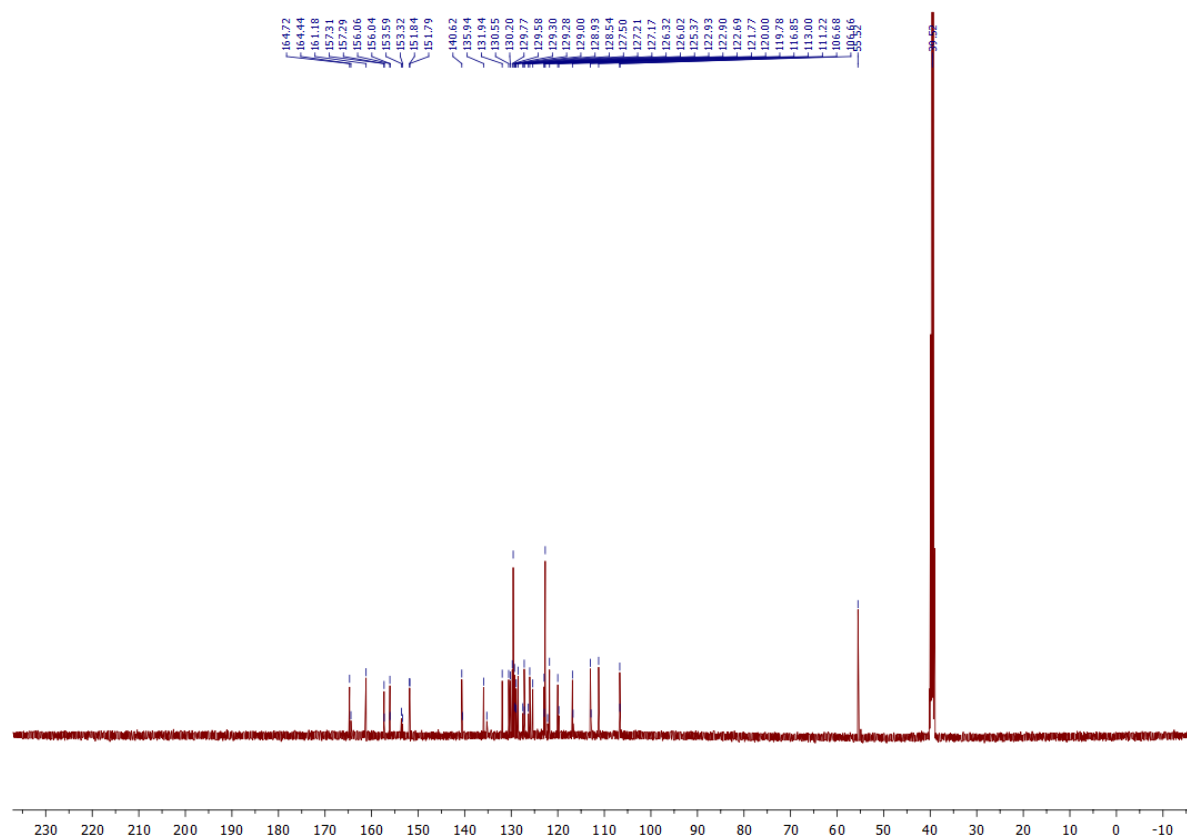

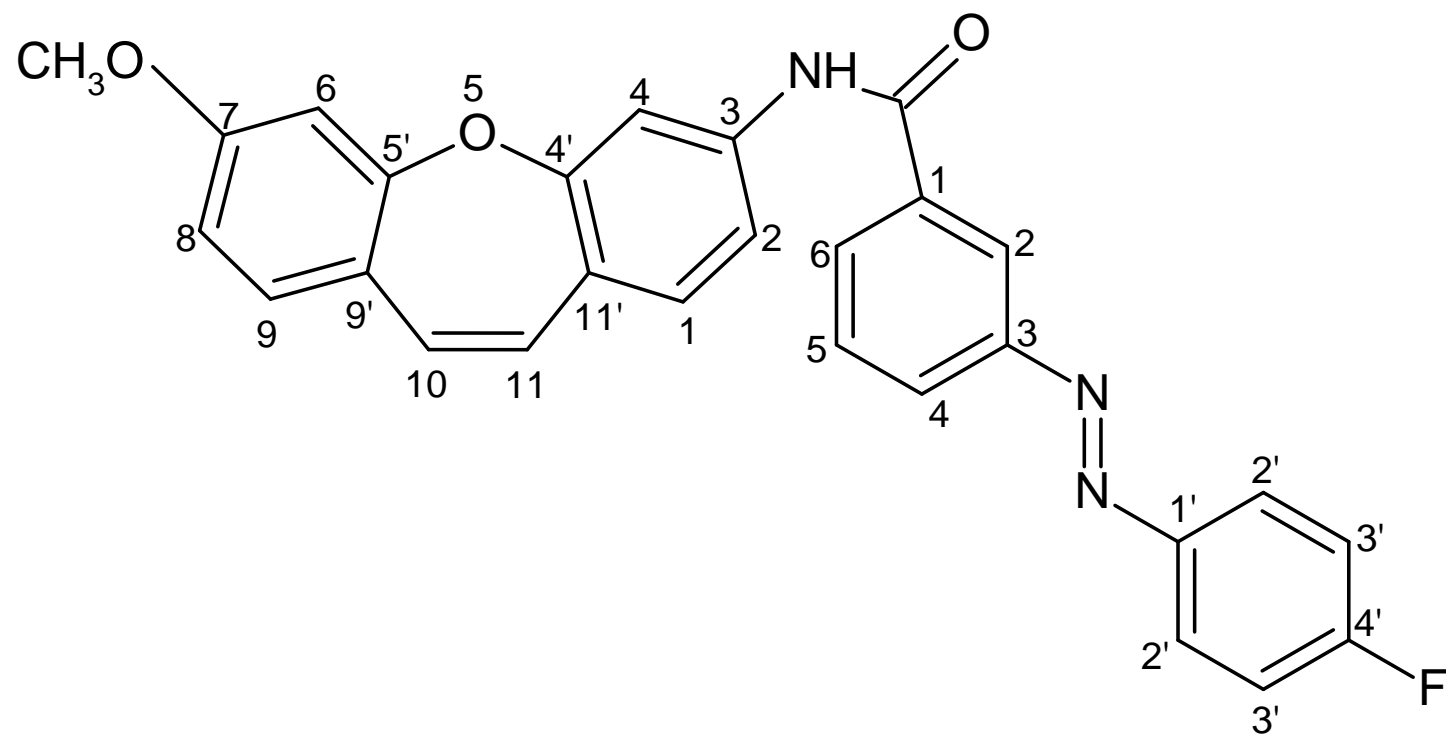

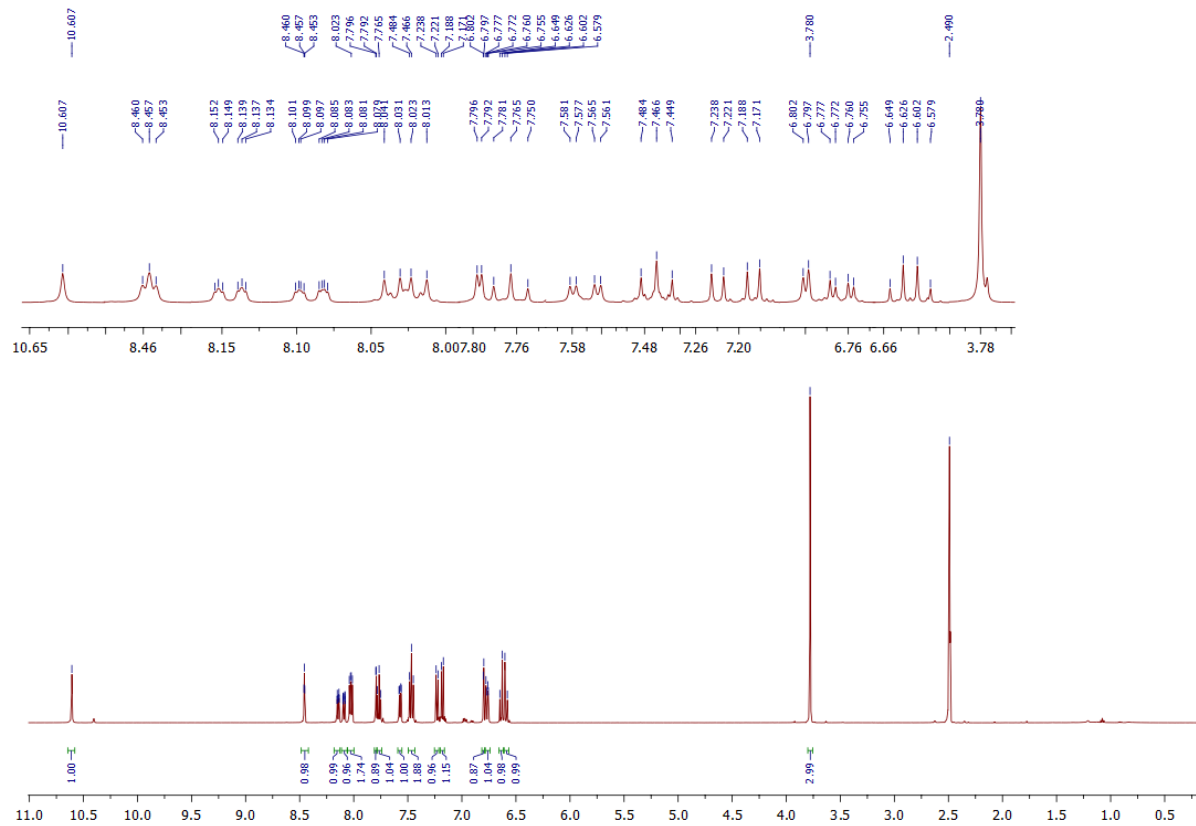

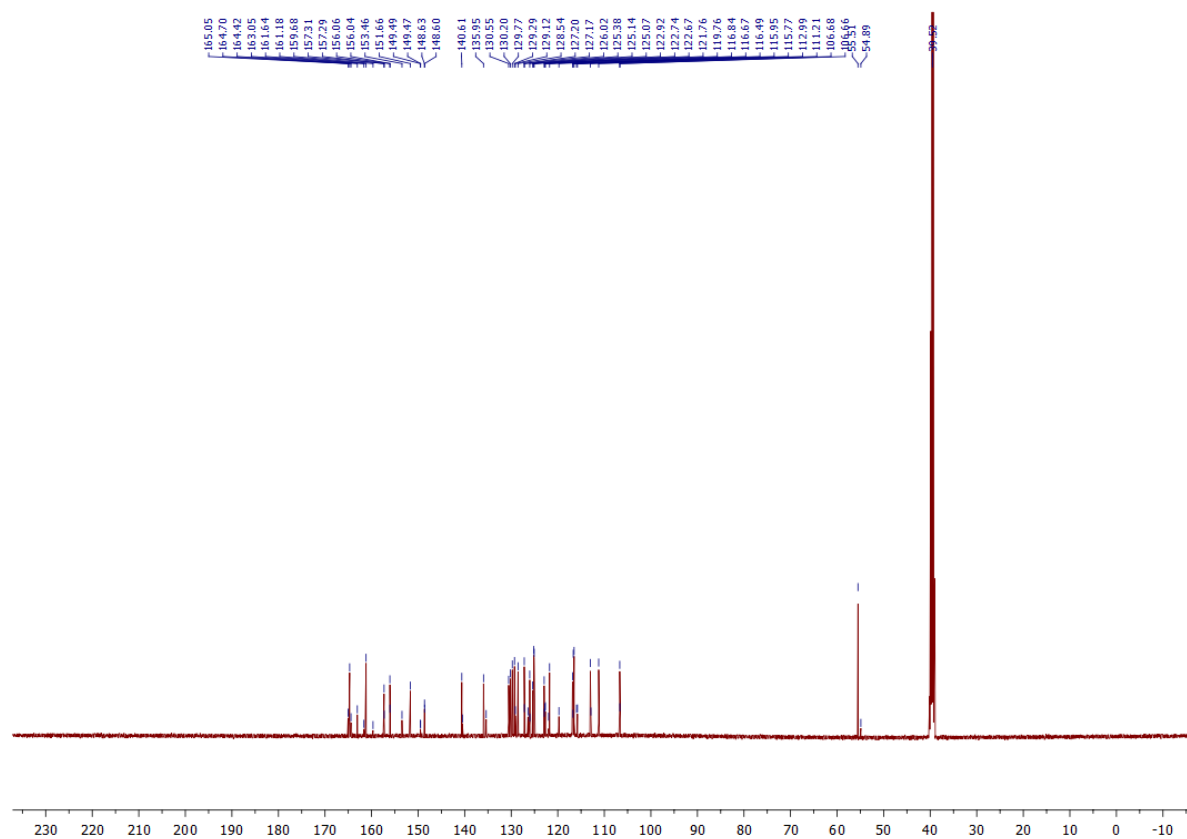

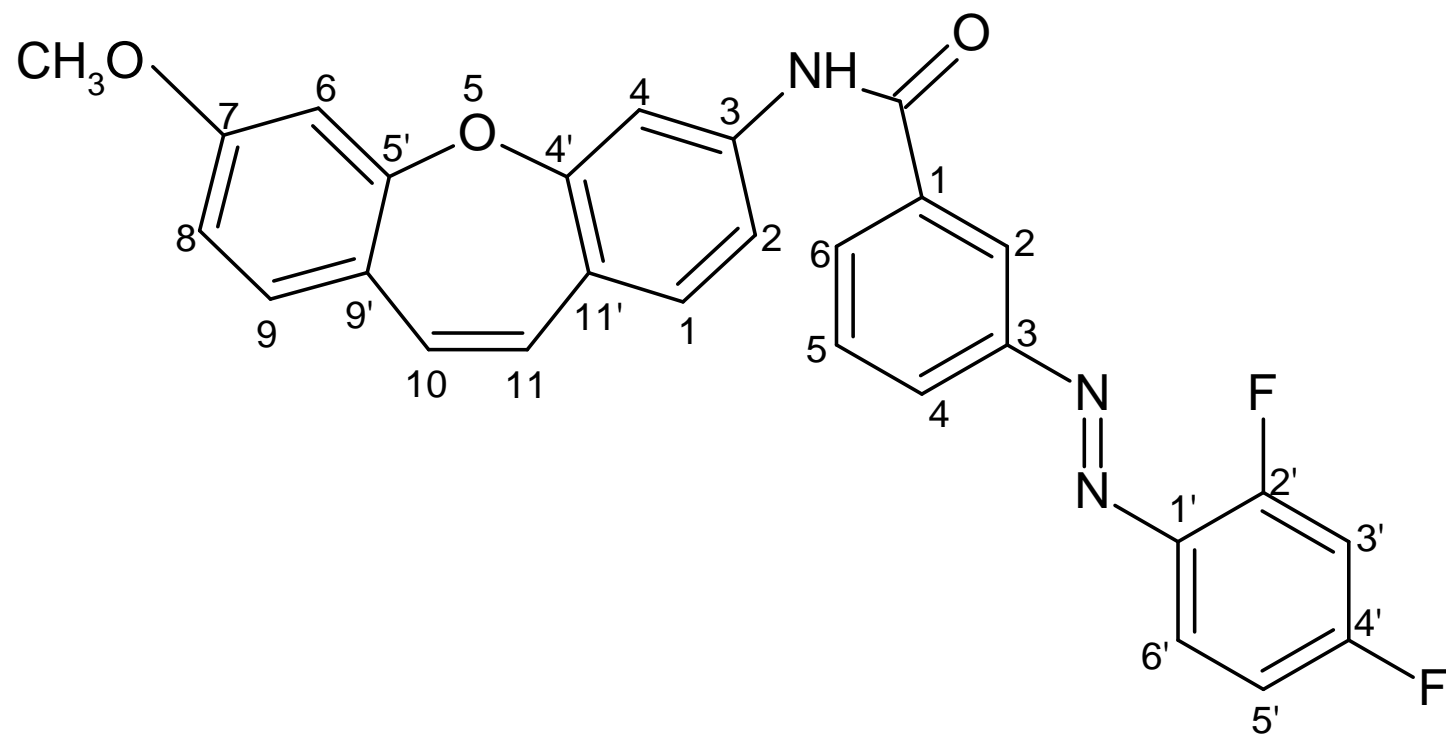

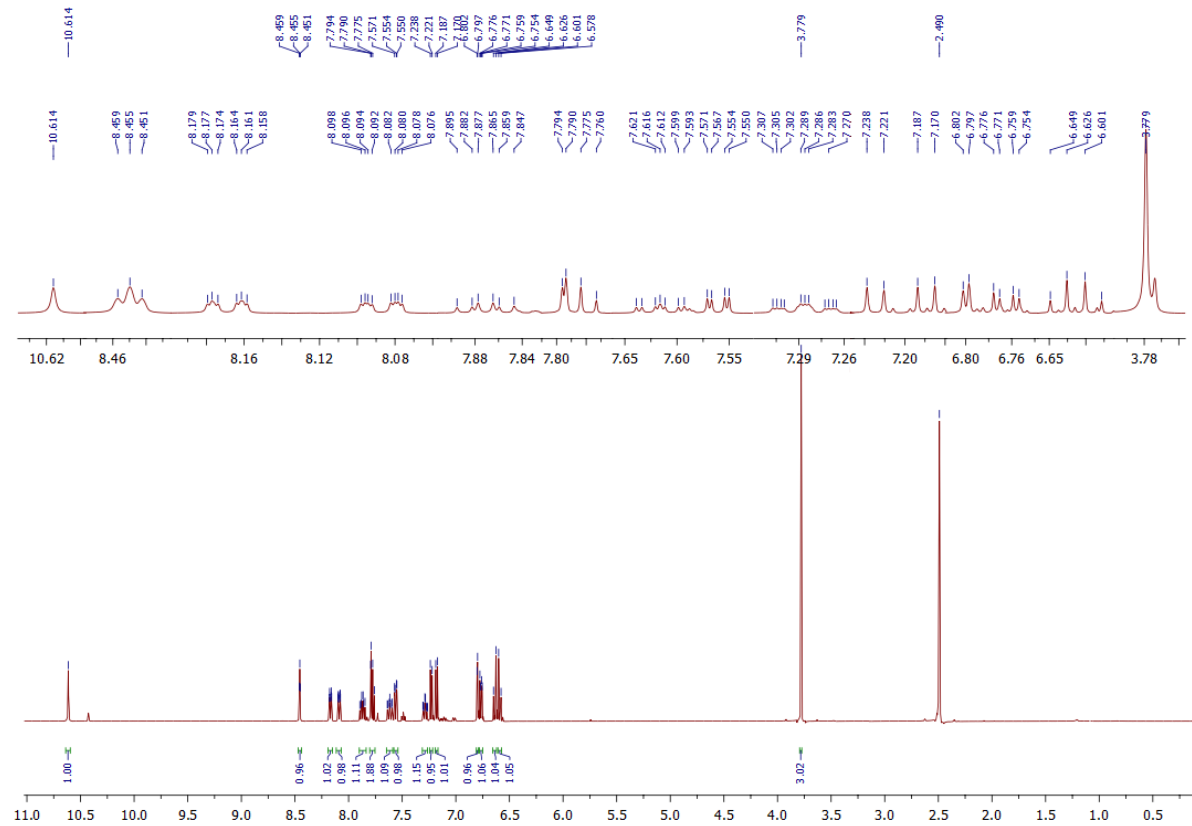

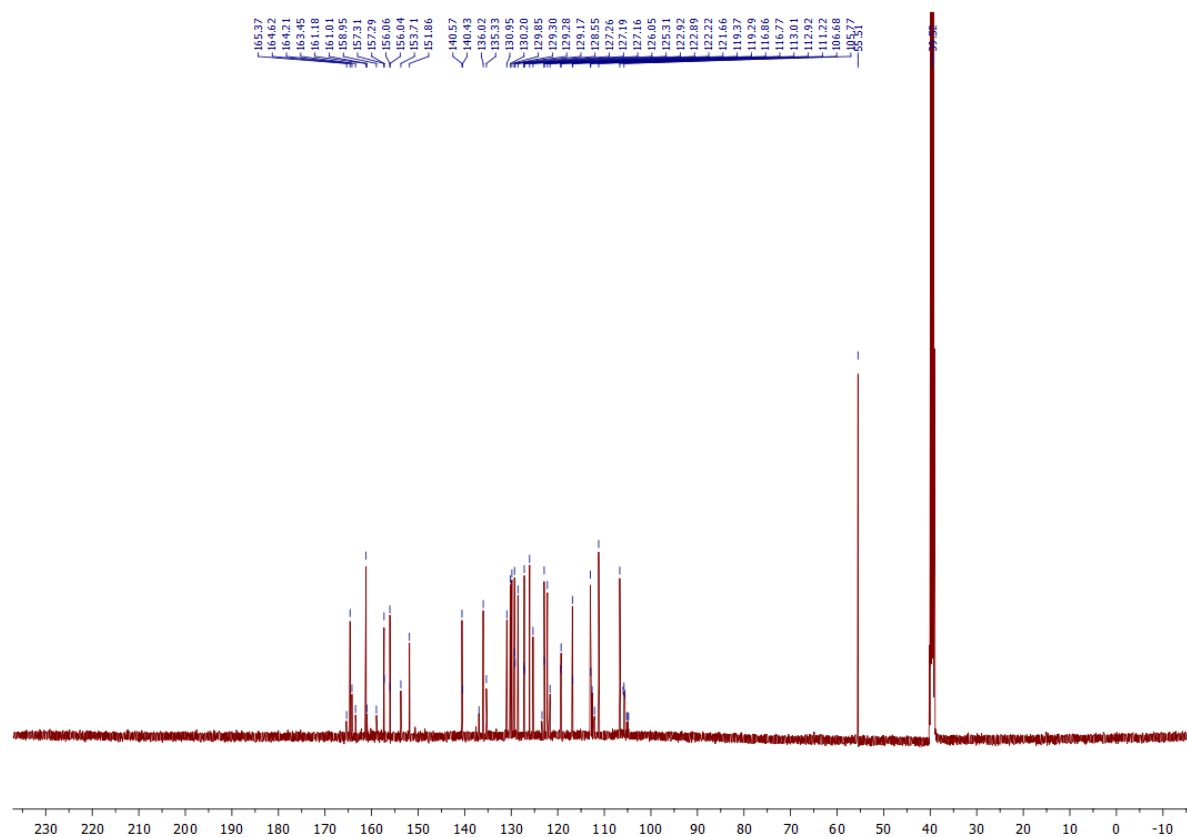

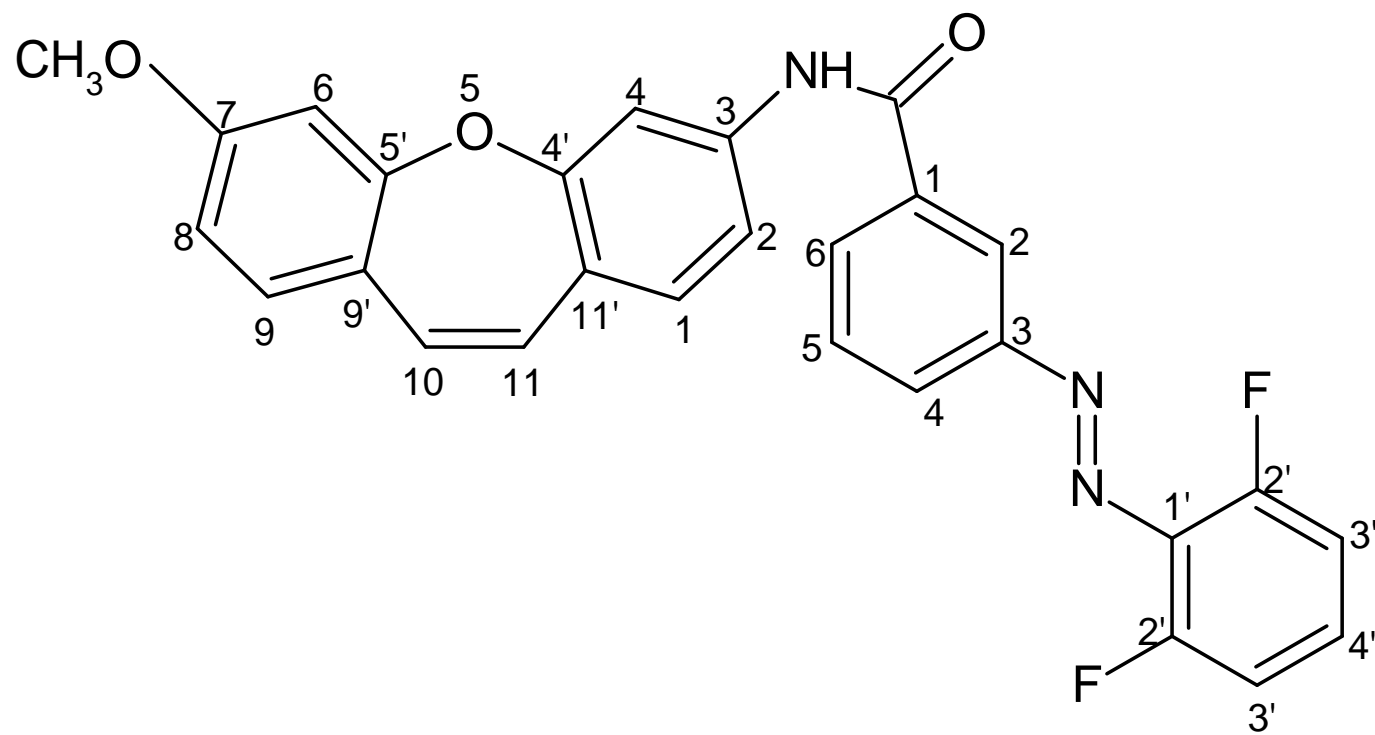

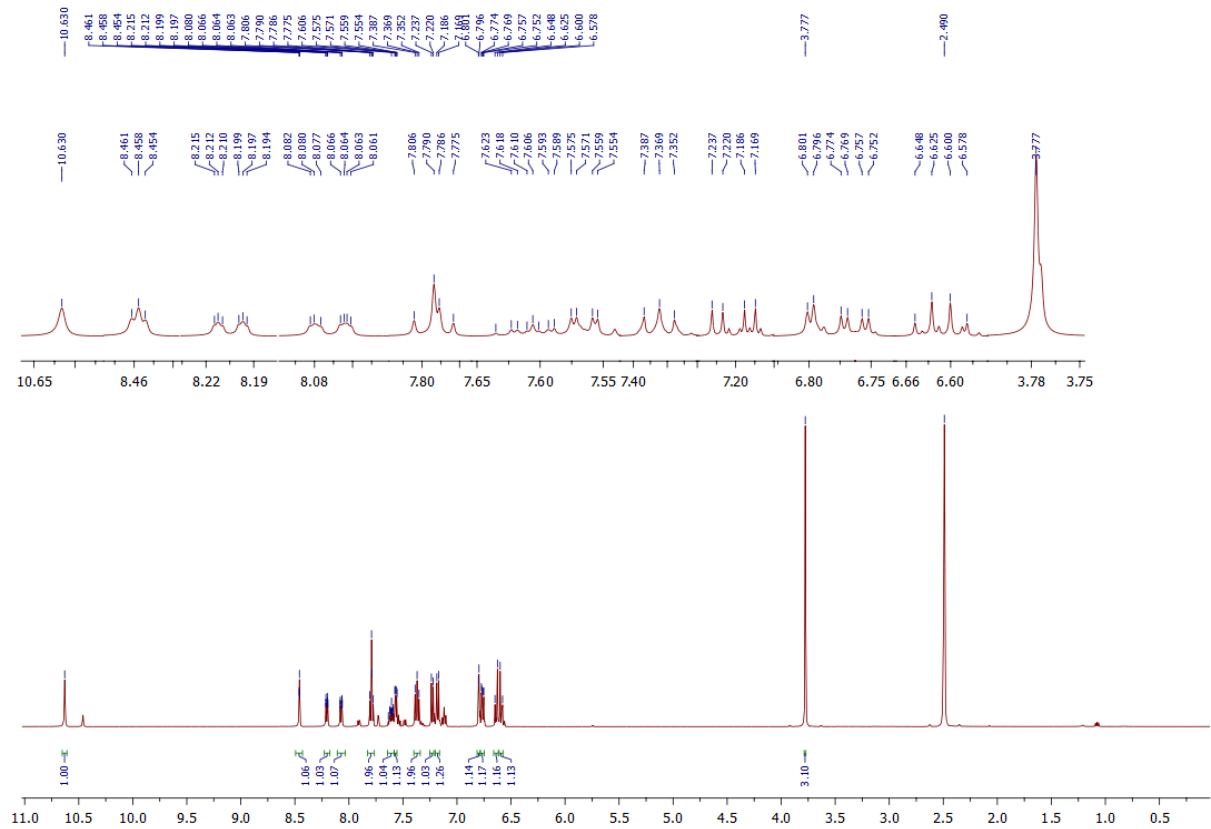

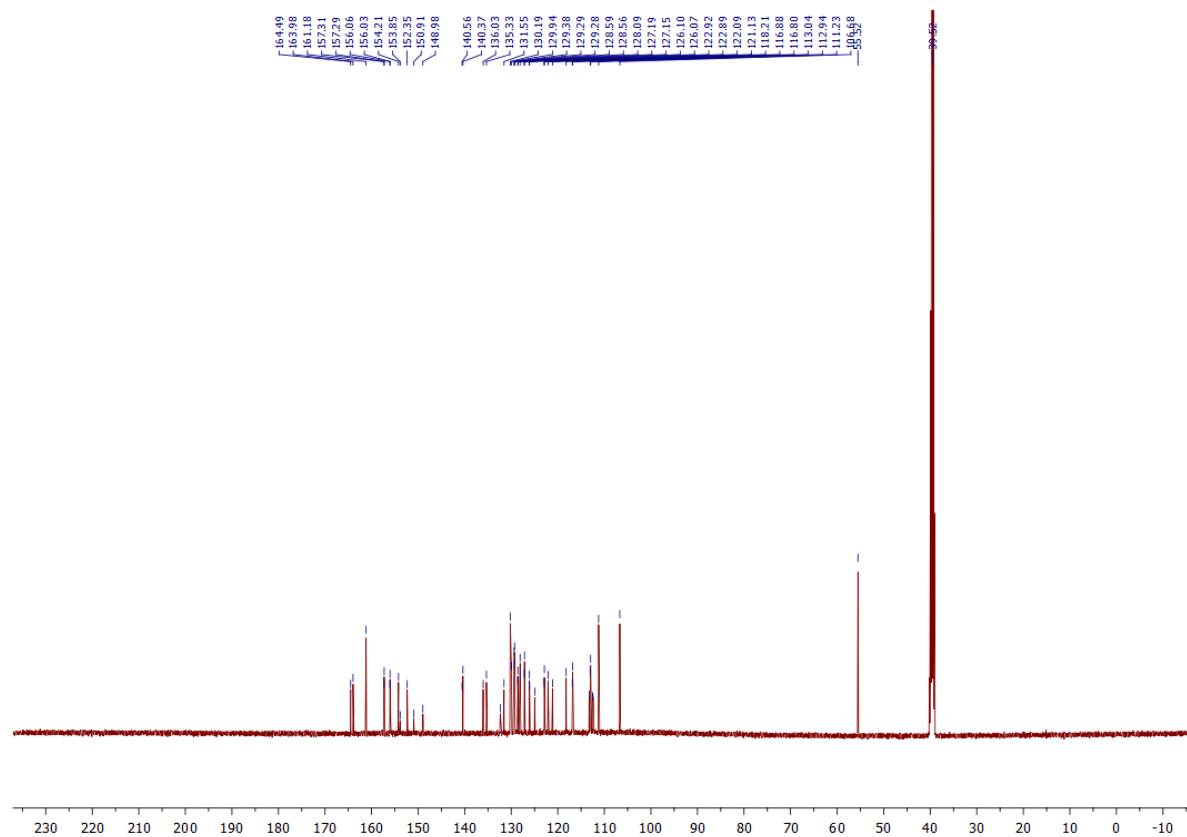

**4. Figure 2S.** a) Scope of olefinic protons spectrum (DMSO-D<sub>6</sub>) of (*5h E*) and (*5h Z*) reaction products measured at different temperatures;  
b) irradiation with light at wavelength  $\lambda = 525$ , 10 min.\*

**a) Temp. 80°C**

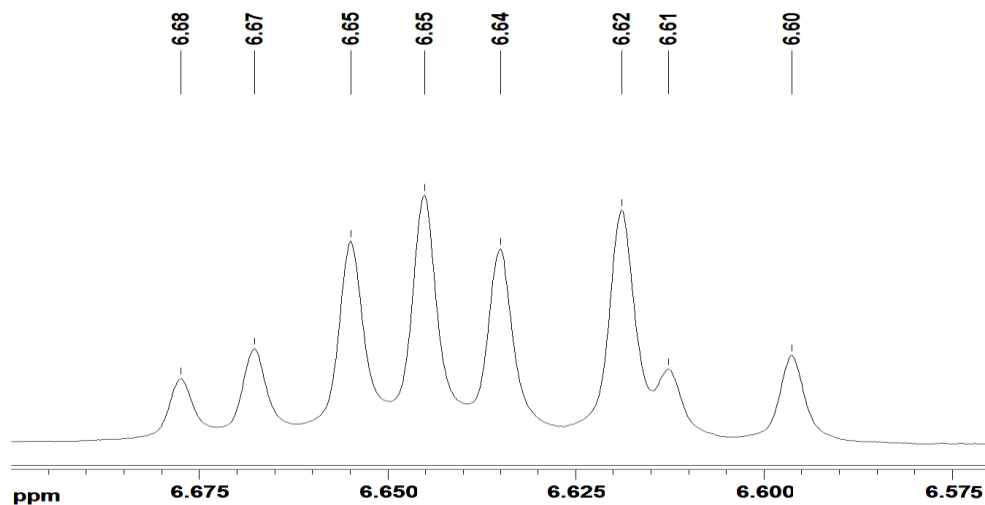

**Temp. 100°C**

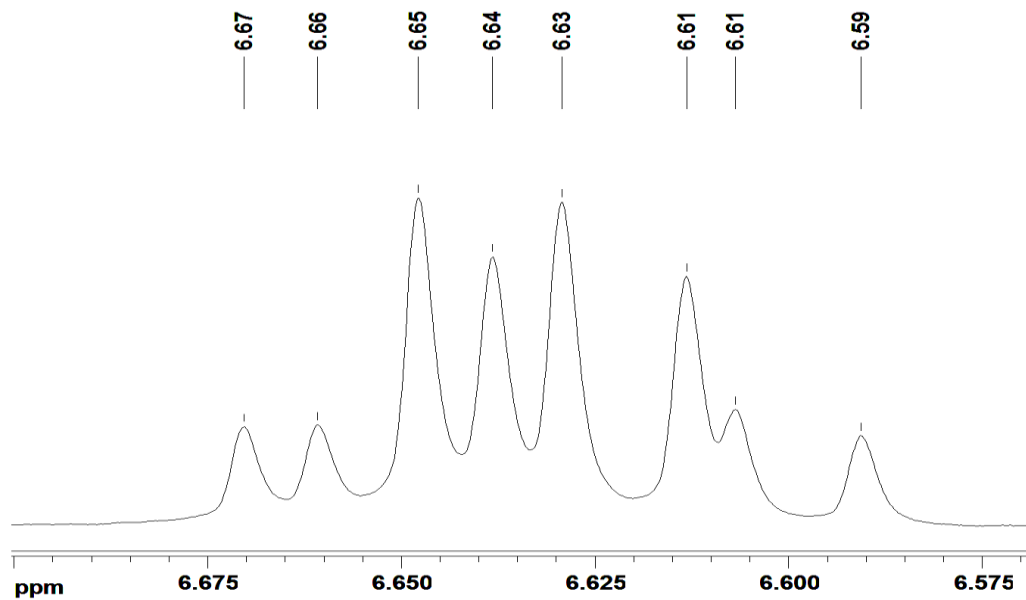

Temp. 110°C

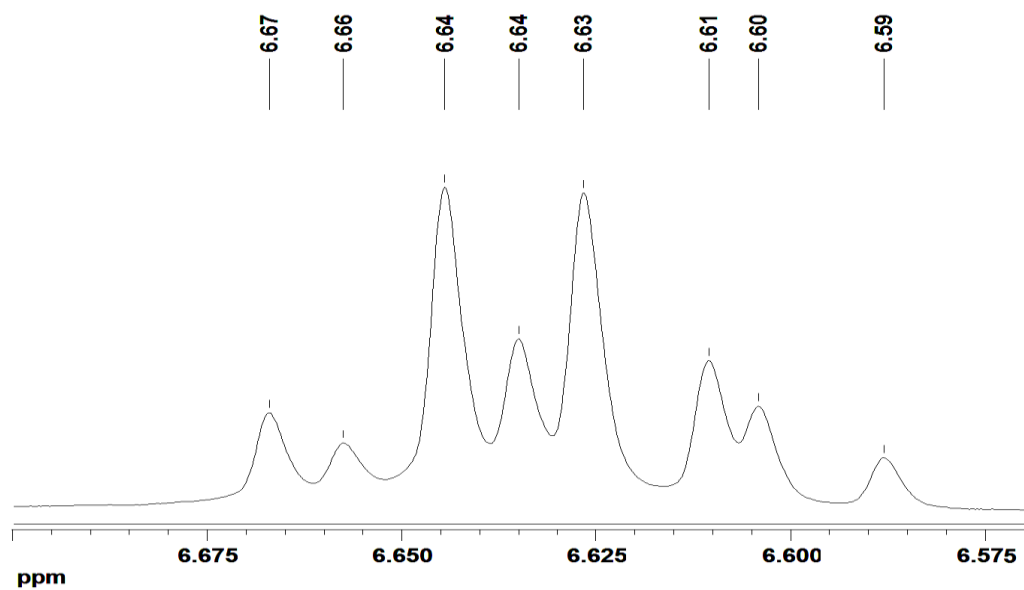

Temp. 150°C

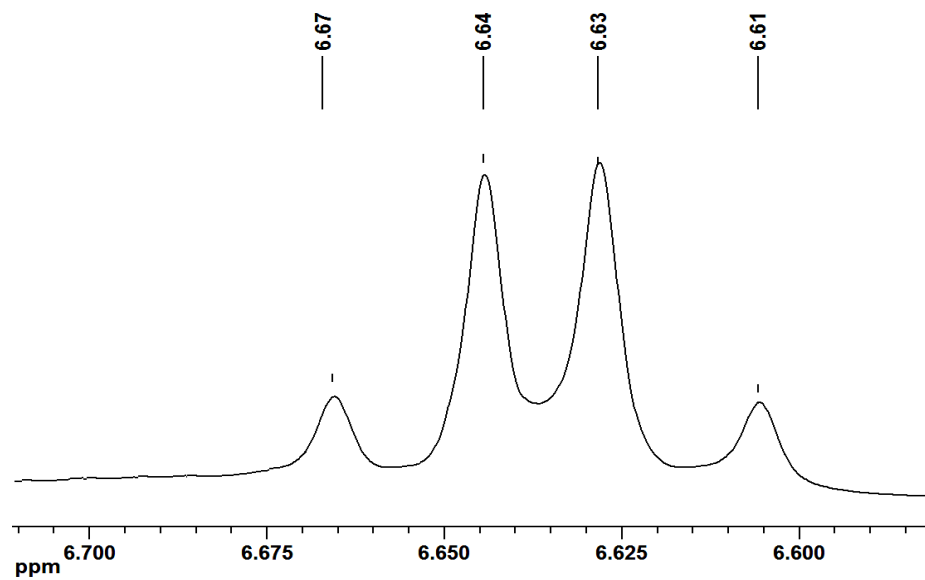

b) irradiation with light at wavelength  $\lambda = 525$ , 10 min (ratio *E/Z* 1:1)

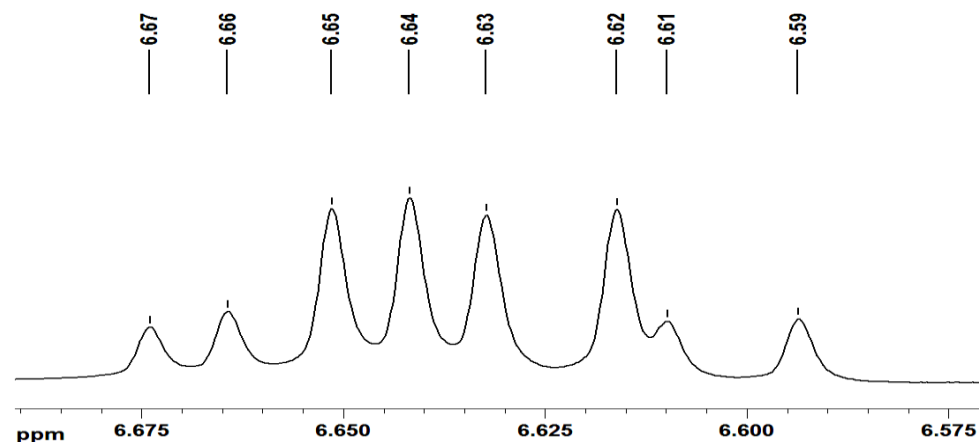

\*NMR spectra after irradiation with light with a wavelength of  $\lambda = 525$ , after 10 min was made to determine the *E/Z* isomer ratio. We presented the spectral range of olefinic protons (DMSO- $D_6$ ) of the reaction products (**5hE**)/(**5hZ**). The *E* / *Z* isomer ratio for (**5dE**)/(**5dZ**) and (**5hE**)/(**5hZ**), after 10 min was 1 : 1.

## 5. References

- [1] M.J. Frisch, G.W. Trucks, H.B. Schlegel, G.E. Scuseria, M.A. Robb, J.R. Cheeseman, J.A. Montgomery, T. Vreven, K.N. Kudin, J.C. Burant, J.M. Millam, S.S. Iyengar, J. Tomasi, V. Barone, B. Mennucci, M. Cossi, G. Scalmani, N. Rega, G.A. Petersson, H. Nakatsuji, M. Hada, M. Ehara, K. Toyota, R. Fukuda, J. Hasegawa, M. Ishida, T. Nakajima, Y. Honda, O. Kitao, H. Nakai, M. Klene, X. Li, J.E. Knox, H.P. Hratchian, J.B. Cross, V. Bakken, C. Adamo, J. Jaramillo, R. Gomperts, R.E. Stratmann, O. Yazyev, A.J. Austin, R. Cammi, C. Pomelli, J.W. Ochterski, P.Y. Ayala, K. Morokuma, G.A. Voth, P. Salvador, J.J. Dannenberg, V.G. Zakrzewski, S. Dapprich, A.D. Daniels, M.C. Strain, O. Farkas, D.K. Malick, A.D. Rabuck, K. Raghavachari, J.B. Foresman, J.V. Ortiz, Q. Cui, A.G. Baboul, S. Clifford, J. Cioslowski, B.B. Stefanov, G. Liu, A. Liashenko, P. Piskorz, I. Komaromi, R.L. Martin, D.J. Fox, T. Keith, M.A. Al-Laham, C.Y. Peng, A. Nanayakkara, M. Challacombe, P.M.W. Gill, B. Johnson, W. Chen, M.W. Wong, C. Gonzalez, J.A. Pople, Gaussian Inc., Wallingford, CT, **2004** (Gaussian 03, Revision E.01).
- [2] J. Tomasi, B. Mennucci, R. Cammi, Quantum mechanical continuum solvation models, *Chem. Rev.* **2005**, *105*, 2999-3094.
- [3] RCSB Protein Data Bank—RCSB PDB. Available online: <http://www.rcsb.org/pdb/home/home.do> (accessed on 23 February **2004**).
- [4] O. Trott, A.J. Olson, AutoDock Vina: Improving the speed and accuracy of docking with a new scoring function, efficient optimization and multithreading. *J. Comput. Chem.* **2010**, *31*, 455–461.
- [5] E.F. Pettersen, T.D. Goddard, C.C. Huang, G.S. Couch, D.M. Greenblatt, E.C. Meng, T.E. Ferrin, UCSF Chimera—a visualization system for exploratory research and analysis. *J. Comput. Chem.* **2004**, *25*, 1605–1612.
- [6] The PyMOL Molecular Graphics System, Version 1.3, Schrödinger LLC, 2010.
- [7] S. Salentin, S. Schreiber, V.J. Haupt, M.F. Adasme, M. Schroeder, PLIP: fully automated protein-ligand interaction profiler, *Nucleic Acids Res.* **43** (2015) W443–W447.
